# Supplementary material for: Effects of Undaria pinnatifida-derived brown algae polysaccharide (UPS) on the nutritional composition, digestive capacity, immune performance and intestinal microbiota of juvenile sea cucumber (Apostichopus japonicus)
Source: PeerJ. 2025 Aug 19;13:e19944. doi: 10.7717/peerj.19944 (PMC12372788; doi:10.7717/peerj.19944)
Supplement: Supplemental Information 5 — Raw data of the growth indicators including Final body weight (W0), Initial body weight (WT), Body wall weight (WB), Body wall length (L), Intestinal tract length (LI), Intestinal tract weight (WI). [file peerj-13-19944-s005.xlsx]

## Sheet: Sheet1
Final body weight (W0, g)	1	2	3	4	5	6	7	8	9	10	11	12	13	14	15	16	17	18	19	20	21	22	23	24
HS0-1	6.7	7.4	7.5	7.8	7.8	8.2	8.9	8.9	12.7	12.7	12.7	13.3	13.4	13.5	13.6	13.7	22.6	24.5	24.6	25	25.6	26.2	27.9	29.9
HS0-2	8.9	9.2	9.4	9.4	10.3	10.6	10.7	10.7	13.7	14.3	14.3	14.5	14.8	14.9	14.9	15	18.3	18.9	20	20.1	20.5	20.7	21.2	22.2
HS0-3	10.8	11.1	11.4	11.5	11.6	11.7	11.9	12.4	15.1	15.2	15.2	15.3	15.3	15.5	15.5	15.6	15.6	15.6	16	16	16.1	17	17.5	18.3
HS1-1	6.8	7.7	7.7	7.8	8	8.3	8.4	8.5	12.5	12.7	13	13	13.2	13.3	13.6	13.8	24.4	24.4	24.6	27	27.9	29.7	29.7	31.7
HS1-2	9.3	9.5	9.6	10.2	10.4	10.7	10.7	10.7	13.8	13.9	14.2	14.2	14.3	14.4	14.5	16.3	20.2	20.3	20.5	21	21.3	21.5	22	23.5
HS1-3	10.9	11.5	11.8	11.9	12	12.2	12.3	12.3	16.3	16.3	16.6	16.6	16.9	17.5	17.7	17.8	17.9	18.3	18.5	18.6	19.4	19.6	19.7	20
HS2-1	15.2	15.4	15.6	6.3	6.4	6.8	6.9	7.3	11.2	11.6	11.6	12.5	12.6	12.6	13.2	13.4	23.6	24.4	25.5	25.8	26.1	26.6	26.8	29.4
HS2-2	17.8	8.5	18.5	8.8	8.9	8.9	9.2	9.3	13.6	14.9	15	15.1	15.1	15.1	15.4	15.4	19.6	19.9	20.3	21.9	22.9	23.1	23.3	23.5
HS2-3	19.3	19.4	19.4	9.7	9.8	10.6	10.9	11.2	15.7	15.8	16.4	16.4	16.7	16.9	17	17.2	17.6	17.6	18	18	18.2	18.2	19.4	19.5
HS3-1	5.2	5.6	5.7	5.9	6.6	7.5	8.3	13.2	13.7	13.8	14.6	14.7	14.9	15	22.4	22.5	22.7	23.1	23.2	23.4	23.9	23.9	28
HS3-2	8.7	9.1	9.8	10.7	10.7	10.8	11	15.1	15.5	15.7	16.4	17.2	17.2	17.7	20.4	21	21	21.3	21.4	21.8	22.1	24.8	28.6
HS3-3	11	11.3	11.5	11.8	11.8	12	13.2	17.9	18.3	18.3	18.5	18.6	18.8	19	19.7	19.8	19.8	19.9	20.1	20.3	20.3	25.2	29.1
HS4-1	4.5	6.6	6.7	6.7	7	8.5	8.5	12.7	12.7	12.8	12.8	13.2	13.3	13.5	23.9	24.2	24.3	24.4	26.2	26.7	26.8	27.3	30.4
HS4-2	8.9	9.2	9.4	9.6	9.7	10.6	10.8	14	14.2	14.2	14.3	14.3	14.4	15.1	20.3	20.4	20.7	20.8	20.9	21.8	22.1	29.9	31.5
HS4-3	11.7	11.8	11.9	12	12	12.2	12.5	15.5	15.6	15.6	15.9	16.1	16.5	17.1	17.1	18	18.3	18.5	19	19.1	20	30.3	39.3
HS5-1	5.1	5.9	6.7	7	7.9	8.5	9	13.2	13.3	13.4	13.7	14.5	15	15.3	24.4	24.5	26.3	26.4	27.4	27.7	29.9	31.3
HS5-2	9.1	9.2	9.9	10.5	10.6	11.6	11.8	15.4	15.5	15.5	15.5	15.8	16	16.2	22	22.3	22.8	23.3	23.7	24.1	24.3	31.1
HS5-3	11.8	12	12.2	12.3	12.4	12.8	13	16.7	17.1	17.5	17.6	17.7	17.7	18.3	18.6	19.2	20.3	20.4	20.6	21.4	21.5	30.3
Initial body weight (WT, g)	1	2	3	4	5	6	7	8	9	10	11	12	13	14	15	16	17	18	19	20	21	22	23	24
HS0-1	6.9	7.5	7.6	7.9	8.5	8.8	8.8	8.9	11	11.2	11.4	11.5	11.5	11.6	11.6	14.2	18.3	18.6	18.7	19	19.3	19.5	19.7	15.4
HS0-2	8.9	9	9.4	9.4	9.6	9.6	9.7	9.8	12	12.1	12.3	12.6	12.7	12.7	12.8	12.9	15.4	15.5	15.7	16	17.2	17.5	17.7	18
HS0-3	9.8	9.8	10	10.1	10.1	10.5	10.5	10.8	13.1	13.2	13.3	13.5	13.6	13.7	13.7	11.9	14.3	14.6	14.9	15	15.1	15.2	15.2	22.3
HS1-1	7	7.8	7.9	8.7	9.1	9.4	9.4	9.5	11.5	11.6	11.8	11.8	11.8	12	12	12.1	17.8	18.7	19.2	19.3	20.2	20.8	21	22.7
HS1-2	9.6	9.7	9.9	10	10	10.1	10.2	10.3	12.1	12.3	12.3	12.6	13.2	13.2	13.5	13.5	15.7	15.8	15.8	15.8	16.3	16.9	17.1	17.7
HS1-3	10.3	10.4	10.7	10.8	11.1	11.1	11.3	11.4	13.6	13.6	13.8	13.8	14	14	14.2	14.3	14.4	14.4	14.4	14.5	14.7	14.9	15.1	15.2
HS2-1	6.3	7.9	8.1	8.4	8.4	8.6	8.9	9.4	11.8	12	12.2	12.3	12.3	12.3	12.6	12.8	18.2	18.5	18.9	19.7	20.2	22.8	22.8	23.7
HS2-2	9.5	9.7	9.8	10.3	10.3	10.7	10.8	10.9	12.8	13.1	13.3	13.4	13.7	13.7	13.8	13.9	15.9	16.3	16.3	16.5	16.8	17.8	17.9	18.1
HS2-3	11	11	11.1	11.2	11.2	11.2	11.3	11.8	13.9	14.1	14.4	14.4	14.6	14.7	14.7	14.8	14.9	14.9	15.1	15.4	15.5	15.6	15.6	15.8
HS3-1	7.5	8.1	8.3	8.9	9.1	9.2	9.4	11.6	11.7	12.2	12.5	12.6	12.6	12.6	17.6	17.7	17.7	18.8	19	19.1	20.8	21	24.4
HS3-2	9.6	10	10.4	10.6	10.7	11	11	12.6	12.8	12.8	13.3	13.4	13.5	13.6	16.5	16.5	16.9	17	17.2	17.2	17.3	22.5	26.4
HS3-3	11	11.1	11.1	11.2	11.2	11.3	11.4	13.7	14.2	14.4	14.6	14.6	14.8	15	15.2	15.5	15.5	15.5	16	16	16.4	23.8	36
HS4-1	7.4	8	8.1	8.6	8.6	9	9.6	12	12.4	12.6	12.6	12.7	12.9	13.2	19.1	19.8	20.8	21	21.1	21.1	21.3	21.4	24.7
HS4-2	9.7	9.8	9.9	9.9	10	10.4	10.5	13.3	13.3	13.4	13.4	13.7	14	14.1	17	17	17.7	18.1	18.6	18.8	19.1	23.4	19.4
HS4-3	10.6	10.6	10.6	10.7	11.1	11.9	12	14.1	14.3	14.5	14.5	14.7	14.7	14.7	14.9	15.1	15.2	15.3	16	16.2	16.7	24	19.4
HS5-1	8.4	8.5	8.7	8.7	8.9	9.2	9.2	12.8	12.9	13	13.2	13.3	13.4	13.5	19.7	20.5	21.4	22.3	22.9	23.4	23.8	29.2
HS5-2	9.3	9.4	9.5	10	10.5	10.9	10.9	13.6	13.7	13.7	13.7	13.8	14	14.1	17.6	18	18.2	18.4	18.5	18.9	19	28.8
HS5-3	10.9	11.4	11.5	12.3	12.3	12.4	12.5	14.4	14.5	14.9	14.9	14.9	15	15	15.1	15.5	15.8	16.7	16.9	17.1	17.3	24.4
Sample	Body wall weight（WB/g)	Body wall length（L/cm)	Intestinal tract length（LI/cm)	Intestinal tract weight（WI/g)
HS0-1	16.61	5.8	23	0.66
HS0-2	14.88	6.9	23.1	0.4
HS0-3	15.77	7.2	17.7	0.35
HS0-4	15.15	5.9	22.7	0.43
HS0-5	14.24	5.2	24.2	0.64
HS1-1	18.63	6.8	27	0.67
HS1-2	15.54	6.3	23.7	0.54
HS1-3	16.24	7	29.7	0.76
HS1-4	13.83	5.9	23	0.85
HS1-5	15.15	6.8	26.4	0.62
HS2-1	10.65	5.1	17.9	0.46
HS2-2	18.79	7.1	26.9	0.66
HS2-3	12.87	6.2	28.2	0.6
HS2-4	17.32	8.1	22.5	0.68
HS2-5	15.06	6.9	20.4	0.39
HS2-6	15.75	6.9	25.8	0.67
HS3-1	16.6	6.6	21.6	0.48
HS3-2	18.67	7.1	20	0.55
HS3-3	18.43	6.2	22.4	1
HS3-4	18.07	8.2	18.7	0.53
HS3-5	16.64	5.8	21.6	0.48
HS4-1	20.47	7.4	25.8	0.85
HS4-2	15.3	6.8	24.8	0.56
HS4-3	18.27	6.9	27.6	0.85
HS4-4	19.19	7.3	29.2	0.81
HS4-5	18.43	6.8	29	0.81
HS5-1	18.67	7	26	0.82
HS5-2	14.12	5.8	21.8	0.56
HS5-3	21.56	6	25.8	1
HS5-4	20.57	6.8	28.88	0.7
HS5-5	17.06	7	24.6	0.81
