# Supplementary material for: Effects of Undaria pinnatifida-derived brown algae polysaccharide (UPS) on the nutritional composition, digestive capacity, immune performance and intestinal microbiota of juvenile sea cucumber (Apostichopus japonicus)
Source: PeerJ. 2025 Aug 19;13:e19944. doi: 10.7717/peerj.19944 (PMC12372788; doi:10.7717/peerj.19944)
Supplement: Supplemental Information 7 — Raw data of microbial functional analysis in KEGG Level1, Level2 and Level3. [file peerj-13-19944-s007.xlsx]

## Sheet: KEGG LEVEL1
Level1	HS0-2	HS0-1	HS0-3	HS1-1	HS1-2	HS1-3	HS2-1	HS2-2	HS2-3	HS3-1	HS3-2	HS3-3	HS4-1	HS4-2	HS4-3	HS5-1	HS5-2	HS5-3
Cellular Processes	6.96471e+06	5.80068e+06	7.0675e+06	8.20874e+06	7.54933e+06	7.55596e+06	7.74416e+06	6.56135e+06	5.5957e+06	8.95504e+06	6.37596e+06	6.03497e+06	6.02281e+06	7.04119e+06	5.73332e+06	8.06043e+06	7.0089e+06	6.45955e+06
Environmental Information Processing	8.73903e+06	7.45381e+06	8.99774e+06	1.04396e+07	9.40856e+06	9.50299e+06	9.27685e+06	8.33703e+06	6.9482e+06	1.09316e+07	7.64582e+06	7.3845e+06	7.14655e+06	8.46798e+06	7.17007e+06	1.01008e+07	9.6895e+06	8.13927e+06
Genetic Information Processing	1.04855e+07	9.03352e+06	1.1018e+07	9.45754e+06	10018185	1.01888e+07	1.08822e+07	8.88606e+06	9.69194e+06	1.0022e+07	1.04297e+07	9.81572e+06	1.01145e+07	1.01898e+07	1.02062e+07	1.07714e+07	9.06567e+06	1.19556e+07
Human Diseases	6.83183e+06	5.58647e+06	7.0591e+06	8.60041e+06	6.72964e+06	5.99326e+06	7.56622e+06	6.4134e+06	5.09708e+06	8.71902e+06	6.11027e+06	5.74157e+06	5.53797e+06	6.98102e+06	4.91809e+06	6.61363e+06	6.89065e+06	6.34908e+06
Metabolism	1.17921e+08	1.00084e+08	124472751	1.28866e+08	1.13724e+08	1.10204e+08	1.29189e+08	107694376	1.01141e+08	1.32702e+08	1.13564e+08	1.0643e+08	1.08112e+08	1.19478e+08	1.02971e+08	1.21576e+08	1.16864e+08	122655710
Organismal Systems	2.85891e+06	2.45765e+06	3.06703e+06	2.96722e+06	2.99274e+06	2.9116e+06	3.07532e+06	2.53244e+06	2.63931e+06	3.21679e+06	2.86768e+06	2.57712e+06	2.80524e+06	2.89397e+06	2.56236e+06	3.16588e+06	2.77606e+06	3.04962e+06

## Sheet: KEGG LEVEL2
	Level2	Aging	Amino acid metabolism	Biosynthesis of other secondary metabolites	Cancers: Overview	Cancers: Specific types	Carbohydrate metabolism	Cardiovascular diseases	Cell growth and death	Cell motility	Cellular community - eukaryotes	Cellular community - prokaryotes	Circulatory system	Digestive system	Drug resistance: Antimicrobial	Drug resistance: Antineoplastic	Endocrine and metabolic diseases	Endocrine system	Energy metabolism	Environmental adaptation	Excretory system	Folding, sorting and degradation	Global and overview maps	Glycan biosynthesis and metabolism	Immune diseases	Immune system	Infectious diseases: Bacterial	Infectious diseases: Parasitic	Infectious diseases: Viral	Lipid metabolism	Membrane transport	Metabolism of cofactors and vitamins	Metabolism of other amino acids	Metabolism of terpenoids and polyketides	Nervous system	Neurodegenerative diseases	Nucleotide metabolism	Replication and repair	Sensory system	Signal transduction	Signaling molecules and interaction	Substance dependence	Transcription	Translation	Transport and catabolism	Xenobiotics biodegradation and metabolism
1	HS0-2	570753	1.2052e+07	2.20968e+06	922488	338826	1.39483e+07	365198	1.45163e+06	1.43358e+06	0	3.53828e+06	61400.6	273488	1.30981e+06	499313	365624	1.00158e+06	6.4867e+06	257451	37670.4	2.02344e+06	6.08449e+07	2.31521e+06	71579.4	291575	1.3493e+06	107644	499349	3.30747e+06	4.98639e+06	6.46253e+06	2.37674e+06	1.5054e+06	364999	964638	3.91599e+06	3.88775e+06	0	3.75264e+06	0	38062.6	203223	4.37106e+06	541214	2.49564e+06
1	HS0-1	461054	9.8615e+06	1.97089e+06	766361	247600	1.2348e+07	291160	1.22003e+06	1.28559e+06	0	2.80546e+06	39720	222927	1.17616e+06	402076	291054	888909	5.59876e+06	223806	38826.4	1.7409e+06	5.1526e+07	2.18925e+06	58897.6	276653	1.13434e+06	89853.8	364757	2.69696e+06	4.17483e+06	5.41331e+06	1.99811e+06	1.25733e+06	305746	730562	3.37996e+06	3.38343e+06	5	3.27898e+06	0	33643.5	170885	3.7383e+06	489603	1.84435e+06
1	HS0-3	606598	1.26569e+07	2.38346e+06	945927	337535	1.4937e+07	358045	1.56002e+06	1.51822e+06	12.5	3.41641e+06	59920.4	288847	1.35363e+06	512581	379406	1.07634e+06	6.84101e+06	271135	42385.7	2.09716e+06	6.42338e+07	2.38675e+06	74610.6	301227	1.40159e+06	105399	522257	3.48482e+06	5.08701e+06	6.84285e+06	2.43381e+06	1.60973e+06	418209	1.00529e+06	4.12874e+06	4.13138e+06	2368	3.91036e+06	360	62824.5	211697	4.57775e+06	572838	2.53387e+06
2	HS1-1	635796	1.43035e+07	2.27634e+06	1.15986e+06	559792	1.47048e+07	482681	1.68357e+06	1.54758e+06	0	4.42701e+06	89516.3	298700	1.11828e+06	606337	413792	970359	7.25536e+06	237147	49439.3	1.92671e+06	6.58884e+07	1.80699e+06	65196.7	211808	1.62665e+06	170346	928096	3.71944e+06	6.28376e+06	6.72671e+06	2.82672e+06	1.65536e+06	474256	1.40392e+06	4.00831e+06	3.44469e+06	196	4.15586e+06	0	65456.2	184084	3.90205e+06	550581	3.6938e+06
2	HS1-2	626721	1.09171e+07	1.98038e+06	823147	273482	1.36654e+07	299029	1.28287e+06	1.75322e+06	0	3.98567e+06	83692.2	335555	1.53006e+06	440632	356360	959786	6.56196e+06	320266	34610.7	2.0172e+06	5.84509e+07	2.43595e+06	104571	336871	1.41115e+06	121666	337506	3.28941e+06	5.14473e+06	6.54181e+06	2.30579e+06	1.39722e+06	294649	994233	3.98531e+06	3.75953e+06	588	4.26383e+06	0	37798	187632	4.05382e+06	527574	2.19265e+06
2	HS1-3	566928	9.88682e+06	1.84667e+06	680718	173315	1.37845e+07	223839	1.1638e+06	1.73561e+06	39	4.14256e+06	63967.5	320885	1.68986e+06	360370	336567	970547	6.39661e+06	321061	33458	2.03245e+06	5.70062e+07	2.61496e+06	111672	375029	1.35308e+06	111353	191590	3.03762e+06	5.25395e+06	6.48331e+06	2.12275e+06	1.26159e+06	259039	755851	4.15575e+06	3.89372e+06	688	4.24904e+06	0	5052.59	181350	4.08133e+06	513950	1.60727e+06
3	HS2-1	627193	1.37259e+07	2.38882e+06	1.04372e+06	429114	1.48043e+07	419521	1.61345e+06	1.50817e+06	0	4.04811e+06	74285.3	299815	1.25129e+06	561064	387836	1.08084e+06	7.12474e+06	255082	47183.6	2.15776e+06	6.63209e+07	2.23468e+06	70953.4	265214	1.44097e+06	130393	635979	3.75907e+06	5.36965e+06	7.21314e+06	2.72903e+06	1.71614e+06	425669	1.13293e+06	4.1144e+06	4.03282e+06	44	3.9072e+06	0	62452.2	208634	4.48297e+06	574429	3.05791e+06
3	HS2-2	548304	1.1452e+07	2.02721e+06	881137	372370	1.26851e+07	367895	1.37515e+06	1.31311e+06	0	3.40748e+06	56868.9	232519	1.02889e+06	492580	323459	870393	5868840	215968	30765.6	1.71815e+06	5.51425e+07	1.86496e+06	68733.1	213639	1.22821e+06	108484	544818	3.09578e+06	5.03291e+06	5.79681e+06	2.2783e+06	1.42695e+06	363704	931375	3.49118e+06	3.31242e+06	281	3.30412e+06	0	65451.6	173700	3.68179e+06	465615	2.56475e+06
3	HS2-3	524494	9.66744e+06	2.04114e+06	728281	186162	1.24505e+07	261146	1.18432e+06	1.37298e+06	0	2.53873e+06	31405.5	248469	1.27716e+06	380253	282177	919654	5.56107e+06	257167	29655.2	1.81303e+06	5.21207e+07	2.43436e+06	70690	313688	1.03983e+06	58002.8	182397	2.73718e+06	3.68143e+06	5.61632e+06	1.98485e+06	1.35424e+06	314026	593482	3.42247e+06	3.65591e+06	749	3.26485e+06	1933	37505	179948	4.04305e+06	499670	1.7509e+06
4	HS3-1	689022	1.44349e+07	2.22395e+06	1.1639e+06	526048	1.49827e+07	465106	1.65907e+06	1.91603e+06	0	4.82087e+06	99956.3	361733	1.30575e+06	624341	409819	1.01528e+06	7.35841e+06	289033	50743.4	2.10582e+06	6.79015e+07	2.04604e+06	85288.5	261452	1.70728e+06	182075	796167	4.04409e+06	6.3364e+06	7.25801e+06	2.94974e+06	1.76104e+06	449261	1.38411e+06	4.1276e+06	3.70939e+06	316	4.59522e+06	0	69141.5	190720	4.0161e+06	559059	3.61398e+06
4	HS3-2	571244	1.16395e+07	2.21927e+06	846167	285158	1.32976e+07	332057	1.36983e+06	1.34684e+06	0	3.14504e+06	44978	297139	1.18205e+06	455555	311873	1.03537e+06	6.41014e+06	239230	36941.8	2.04701e+06	5.8505e+07	2.18492e+06	74803.5	298674	1.21177e+06	113443	395464	3.09643e+06	4.13088e+06	6.27649e+06	2.28947e+06	1.53912e+06	343195	853946	3.81343e+06	3.91563e+06	911	3.51494e+06	0	47981.1	191725	4.27535e+06	514249	2.29213e+06
4	HS3-3	509489	1.06027e+07	1.97597e+06	800982	267823	1.28253e+07	303220	1.28031e+06	1.26193e+06	0	3.0244e+06	47394.9	261829	1.2015e+06	438163	306388	910084	5.97126e+06	228402	32354.9	1.85246e+06	5.46269e+07	2.151e+06	68164.6	264548	1.11233e+06	80315.2	351537	2.98733e+06	4.13965e+06	5.8606e+06	2.16817e+06	1.42175e+06	322874	779042	3.63596e+06	3.67851e+06	148	3.24485e+06	0	32108.2	189548	4.0952e+06	468334	2.20295e+06
5	HS4-1	550547	1.00347e+07	2.03359e+06	689996	201772	1.31752e+07	251196	1.304e+06	1.06092e+06	0	3.07147e+06	43970.7	329813	1.33419e+06	391178	305814	1.00224e+06	6.39863e+06	258686	28729.8	1.97392e+06	5.55541e+07	2.65285e+06	91891.4	319911	1.16665e+06	104641	257387	2.86862e+06	3.80551e+06	6.26934e+06	2.12662e+06	1.3333e+06	270605	726515	3.9294e+06	3.84114e+06	740	3.34103e+06	0	16746	175140	4.12426e+06	586410	1.7354e+06
5	HS4-2	586143	1.25339e+07	2.16963e+06	962263	389237	1.39775e+07	385154	1.48139e+06	1.39311e+06	0	3.64938e+06	62567.4	287386	1.18143e+06	522373	353041	1.0189e+06	6.77279e+06	231046	46555.1	1.99645e+06	6.14865e+07	2.04839e+06	74063.7	268893	1.32593e+06	129507	581278	3.31362e+06	4.81908e+06	6.52406e+06	2.47801e+06	1.53667e+06	392007	1.0229e+06	3.90599e+06	3.79092e+06	471	3.64891e+06	2	53836	192248	4.21017e+06	517306	2.7305e+06
5	HS4-3	489695	9.68866e+06	1.95464e+06	667978	150606	1.27501e+07	226087	1.13815e+06	1.1256e+06	0	2.99811e+06	31494.5	255325	1.31463e+06	349945	288754	944780	5.77713e+06	236815	29470.1	1.90809e+06	5.32505e+07	2.37813e+06	74834.1	295882	1.04291e+06	64193.5	167838	2.752e+06	3.95296e+06	5.84476e+06	1.96287e+06	1.30485e+06	278524	554060	3.70093e+06	3.84945e+06	377.17	3.21711e+06	0	16252	195621	4.25308e+06	471475	1.60647e+06
6	HS5-1	626546	1.11354e+07	2.06616e+06	759125	222383	1.50174e+07	259099	1.29045e+06	1.83804e+06	0	4.36299e+06	65191.2	360389	1.71749e+06	404732	366734	1.05691e+06	7.01279e+06	332869	39471.7	2.17722e+06	6.28034e+07	2.73124e+06	112797	379786	1.4992e+06	125761	275364	3.3814e+06	5.49437e+06	7.11922e+06	2.4283e+06	1.4553e+06	302913	846311	4.39392e+06	4.10861e+06	1808	4.60639e+06	0	24637	191631	4.29399e+06	568957	2.03153e+06
6	HS5-2	596147	1.20972e+07	2.11338e+06	923528	375278	1.42432e+07	353527	1.40984e+06	1.39191e+06	0	3.66905e+06	50918.2	266097	1.27336e+06	450378	340335	955149	6.60914e+06	244947	33832.2	1.7746e+06	5.93812e+07	1.91909e+06	69044.3	234900	1.38077e+06	99296.4	578985	3.27103e+06	5.52615e+06	6.06619e+06	2.47512e+06	1.5984e+06	393819	1.00134e+06	3.79028e+06	3.36431e+06	245	4.16335e+06	0	44793	180432	3.74634e+06	538102	3.29933e+06
6	HS5-3	593981	1.17156e+07	2.5102e+06	880711	238192	1.51117e+07	317222	1.48207e+06	1.33866e+06	0	3.03101e+06	39199.7	261865	1.53853e+06	464275	350118	1.11723e+06	6.84627e+06	291076	39889.9	2.21624e+06	6.3102e+07	2.92621e+06	82022	334893	1.3123e+06	73226.5	297751	3.27339e+06	4.43035e+06	6.79177e+06	2.36643e+06	1.59209e+06	371304	736902	4.29939e+06	4.50214e+06	176	3.70892e+06	0	57822	227620	5.00958e+06	607804	2.12067e+06

## Sheet: KEGG LEVEL3
Level3	HS0-2	HS0-1	HS0-3	HS1-1	HS1-2	HS1-3	HS2-1	HS2-2	HS2-3	HS3-1	HS3-2	HS3-3	HS4-1	HS4-2	HS4-3	HS5-1	HS5-2	HS5-3
2-Oxocarboxylic acid metabolism	1.19401e+06	979352	1.19557e+06	1.24754e+06	1.00967e+06	965295	1.28494e+06	1.01633e+06	1.00642e+06	1.27541e+06	1.12763e+06	972831	990687	1.16164e+06	983329	1.11583e+06	1.09939e+06	1.1838e+06
ABC transporters	3.83212e+06	3.11823e+06	3.91338e+06	5.21247e+06	3.73371e+06	3.82523e+06	4.1438e+06	4.01987e+06	2.63923e+06	4.92829e+06	3.08155e+06	3.09152e+06	2.67439e+06	3.78919e+06	2.8443e+06	4.02742e+06	4.57129e+06	3.22362e+06
AMPK signaling pathway	98337.6	93534.17000000001	109062.86000000002	96064.4	117747	132467.08000000002	101192	71624.9	99002.25000000001	97413.79000000001	113096.12000000001	87046.4	107959.93000000001	98584.8	108311.73000000001	130270.62000000001	116560	117168.57999999999
Acarbose and validamycin biosynthesis	103981.76000000001	106170	113771.23000000001	97307.1	86441	75243	113630	99147.98999999999	114426.12000000001	89543.57999999999	117934	100219	92301.70999999999	95350.67000000001	99116.1	87884.15000000001	89237.01999999999	129872.52000000002
Adipocytokine signaling pathway	135798	111763	151895	127760	125271	132123	158095	125707	118203	143975.91999999998	127853	115211	147527.69000000003	139198.48000000004	120382	149849	98352	145479.86000000002
Adrenergic signaling in cardiomyocytes	0	0	592	108.4	147	381	11	75.67	18.5	79	224	32	185	109	566	452	60	44
African trypanosomiasis	10068.5	12195.8	9441	10245	28645.6	33923.590000000004	10180.9	6398.51	12384.2	23438.2	25409.4	9679.66	32340.7	17356.6	13744.2	38437.07000000001	8156.75	11001.8
Alanine, aspartate and glutamate metabolism	1.32741e+06	1.13852e+06	1.40368e+06	1.24342e+06	1.29374e+06	1.37707e+06	1.36567e+06	1.10981e+06	1.20989e+06	1.37122e+06	1.24444e+06	1.19827e+06	1.3121e+06	1.27878e+06	1.23623e+06	1472844.7100000002	1.17379e+06	1.43559e+06
Alcoholism	12687.529999999999	11214.5	21138.8	21835.1	12648.3	1741.5300000000002	20821.1	21837.2	12506.3	23073.5	16068.4	10713.4	5643.67	17981.7	5446.67	8363	14951	19288.7
Aldosterone synthesis and secretion	0	0	592	49	147	172	11	75.67	14	79	224	32	185	109	88	452	60	44
Aldosterone-regulated sodium reabsorption	0	0	0	0	0	0	0	15.67	0	0	0	0	0	0	0	0	0	0
Alzheimer's disease	221962	161865	224877.55000000002	338983	212710	167504.68000000002	273205	222203.86000000002	115879	337608	191151	175465	153143.63999999998	242866	122599	188670	210901.72999999998	162824
Amino sugar and nucleotide sugar metabolism	1.42584e+06	1.35607e+06	1.53389e+06	1286756.3900000001	1.54416e+06	1.70658e+06	1.41253e+06	1.27915e+06	1.38639e+06	1.39673e+06	1.39805e+06	1.30239e+06	1.53041e+06	1.36354e+06	1.45408e+06	1.80223e+06	1.3753e+06	1.68448e+06
Aminoacyl-tRNA biosynthesis	1.32413e+06	1.12669e+06	1.39463e+06	1.21717e+06	1.20857e+06	1.19618e+06	1.36558e+06	1.13345e+06	1205618.6500000001	1.22718e+06	1.28033e+06	1.23726e+06	1.20596e+06	1.29111e+06	1.25807e+06	1265933.1600000001	1.15645e+06	1.49479e+06
Aminobenzoate degradation	139410	97223.6	119566.92000000001	267726	117793	70438.4	203552	159624	102004	234648	145036	128531	90168.5	176267	88910.81999999999	98696.65000000001	266261	115755.54000000001
Amoebiasis	24734.1	19333	20461.4	25428.1	25247.8	25189.7	25730.5	24278.1	14488.6	29690.879999999997	12858.4	17125.2	10531.3	16819.730000000003	20471.8	19642.739999999998	10044	17457.9
Amphetamine addiction	12687.529999999999	11214.5	21138.8	21835.1	12648.3	1741.5300000000002	20821.1	21837.2	12506.3	23073.5	16068.4	10713.4	5643.67	17981.7	5446.67	8363	14951	19288.7
Amyotrophic lateral sclerosis (ALS)	180737	138227	196445	259741	204689	154528.68000000002	207166	169643	126221	258618.34000000003	163802	147755	149392	185104	109336.17000000001	174564	213963	138952
Antifolate resistance	261189	232082	276282	224003	259963	261764	265433	229097	254369.55000000002	253083	252321	249462	267556	253626	251606	271623	208460.24000000002	303873
Antigen processing and presentation	38882.3	36657.4	39264.4	22303.7	39563.8	48016.9	35362.4	24680.2	43206.8	27769.5	38966.740000000005	37147.3	45031	34699.6	42805.240000000005	45096.9	24514.300000000003	46329.4
Apelin signaling pathway	0	0	592	108.4	147	381	11	60	18.5	79	224	32	185	109	566	452	60	44
Apoptosis	96860.2	78946.01000000001	104822	139835.00999999998	70304.7	58109.5	113422	94749.7	65343.7	123185	83119.1	83683.9	85858.01000000001	106121	60893.5	65209.2	97015.6	81227.9
Apoptosis - fly	99927.95999999999	83086.5	105395	147689	94786.70999999999	80664.7	121738	97656	61281.1	143597	100404	82326.4	92088.1	120450	63021.3	94706.8	105549	85062.1
Apoptosis - multiple species	62730.8	44967	65795.8	123940	39159.8	17817.5	82725.4	71013.1	18011.8	105426	48434.6	42302.2	28190.2	75054.5	15549.2	29103.5	73052	33099.9
Arachidonic acid metabolism	46198.9	41649.7	46877.7	29395.790000000005	63325.759999999995	72852.6	48897.6	30564.5	55993.3	53031.9	52670.3	48779	73659.01000000001	41517.2	57149.9	81286	46921.880000000005	46637.8
Arginine and proline metabolism	770055	632599	774908	1.12406e+06	680765	560846.9500000001	930279	815065	574657.9400000001	1.02125e+06	734610	683819	582454	825356	565809.1900000001	636207.8500000001	954862	710086
Arginine biosynthesis	774642	630803	811636	873584	699135	692829	832622	672601	615624	888572	687169	644478	638648	755302	629154	771794.2200000001	746838	752370
Arrhythmogenic right ventricular cardiomyopathy (ARVC)	0	0	0	59.4	0	209	0	0	4.5	0	0	0	0	0	478	0	0	0
Ascorbate and aldarate metabolism	200160	167480	196003	247585	319074	360008	216628.28999999998	182212	163359	316372.10000000003	179726	160612	248692.05000000002	184724	188991	398320	239056	184581
Atrazine degradation	67383.23999999999	41421.5	70530.2	130375	67822	70799.18000000001	79105.4	66817.6	26278.5	110360	46914.100000000006	48565.9	45149	66823.4	38499.5	77575	117828	31503.8
Autophagy - yeast	19583.8	13744.4	20057.9	32356.230000000003	10382.5	1645.45	24338.7	20168	10085	30515.9	22881.5	15202.5	9849.5	25262.050000000003	6563.5	7113.5	18358.2	10502
Bacterial chemotaxis	552626	533870.0700000001	592934	552437.4400000001	686311.6699999999	731844	568486	547402	586333	713575	581666	493669	452520	544223	467468	778961	612068	563954
Bacterial invasion of epithelial cells	2127	4677.88	32.04	5478.9	3840.38	748	421.78000000000003	114.7	1839.3799999999999	221.66	1057.8200000000002	1425.02	42	5356.88	3711.96	0	0	10559
Bacterial secretion system	941584	796217	1.00751e+06	924738	996812	921444	1.04409e+06	807452	841846.7100000001	1.11447e+06	872593	830311	879533	901242	834816	986147	728303	983653
Basal transcription factors	2453	1038	3400.33	2102	872	716	2783	930.67	1592	4890.67	2157.33	2062	950.5	2161	2187	2418	1812.5	858
Base excision repair	530747	444898.70999999996	561230	493474	511299	493918	560820	470114	491121	525319	525312	490134	496463	527277	501191	544687.2100000001	467143	589223
Benzoate degradation	463279	334827	483574	756047	347707.07999999996	191300.83000000002	614868	477292	303169	725944	467696	427283	261478	555232	274029	296755	678502	347232
Betalain biosynthesis	15854.6	13486.130000000001	22215.6	30027.230000000003	12483.5	2194.58	18247.7	17252	17020	21104.5	14478.939999999999	12134	6040	14073.060000000001	5213.16	7261	38254.8	21116.9
Bile secretion	3275.83	866.17	618	3641.5	11581.5	16271.8	4433.51	107.67	804.5	15639	1996.83	2270.5	8503	1383.17	5145	17008.8	7	1318.16
Biofilm formation - Escherichia coli	505625	439429	479309	541874	680630	748103	524037.98000000004	422938	444593	671330	432116	453860	529062	456230.97000000003	466038.97000000003	763670	469122	453520
Biofilm formation - Pseudomonas aeruginosa	236217	198488.86000000002	233850	253930	318898	308375	306040	233948	219482	350589	223881.30000000002	214128	228073	248508	220191	289409	147099	209160
Biofilm formation - Vibrio cholerae	448478	344136	387864	369150	972068	1.16509e+06	507500.97000000003	283081	381936.16000000003	801933	463543	382916	709195	384396	559608	1184064.9100000001	329002	421813
Biosynthesis of amino acids	5.6065e+06	4.70567e+06	5.92435e+06	5.48754e+06	4.91461e+06	4895360.5200000005	5.86709e+06	4.88797e+06	4.89951e+06	5623448.5200000005	5.27337e+06	4.90854e+06	4.79292e+06	5.43496e+06	4.93809e+06	5326214.090000001	4.94291e+06	5.85143e+06
Biosynthesis of ansamycins	82907.9	78166.9	94160.3	71611.2	93107.9	126863	77149.8	68227.3	79009.8	84659.19999999998	93418.8	72006.4	88366	88101.7	87887.4	134159	80113.12999999999	100772
Biosynthesis of enediyne antibiotics	0	0	0	24	0	0	0	0	0	0	0	0	0	0	0	0	0	0
Biosynthesis of secondary metabolites	1.2895e+07	1.09895e+07	1.3646e+07	1.30171e+07	1.23593e+07	1.21087e+07	1.38396e+07	1.1424e+07	1.14723e+07	1.36374e+07	1.25898e+07	1.16081e+07	1.20315e+07	1.27594e+07	11657507.620000001	1.3271e+07	1.20414e+07	1.38242e+07
Biosynthesis of siderophore group nonribosomal peptides	28356.6	38403.7	31326.600000000002	38324.3	42763.9	49198.8	31370.690000000002	32042.1	39190.020000000004	34974.6	38950.3	40467.6	52709.2	34018.700000000004	42469.9	57513.4	59041.2	40903.2
Biosynthesis of type II polyketide backbone	0	0	0	0	0	0	0	627	70	0	0	0	0	0	0	0	0	0
Biosynthesis of type II polyketide products	0	0	200	0	0	0	0	209	84	0	0	0	0	0	0	0	0	326
Biosynthesis of unsaturated fatty acids	55566.9	41718	59266.5	68086.18000000001	102012.59999999999	86775.6	75356.3	55329.280000000006	45472.5	105138	73115.2	51910.009999999995	66491.8	60676.9	45966.3	93672.7	44487.1	48203.5
Biosynthesis of vancomycin group antibiotics	54166.4	55122.9	59811.2	48384.9	44430.6	40674.850000000006	58253.3	52872.9	59790.96000000001	45738	62845.6	51837.3	48299.3	49642.8	52231.1	44477.9	47718.8	65866.01000000001
Biotin metabolism	554659	455484	565859	542314	570382	545573.4400000001	625663	485745.12999999995	492222.04000000004	592113	492528	507368.02999999997	507252	520155	496888	582476	532332	575954
Bisphenol degradation	842	181	464	1715	67	0	1930	25	44	4090	249	1182	204	509	535	0	0	0
Bladder cancer	18891.9	12429.2	18372.9	27114	18982.2	18467.8	23483.9	18094.4	10299.3	29905.9	12331.6	14310	11432	20761.5	11125	22668.070000000003	13509.5	9754
Butanoate metabolism	1.11447e+06	882738	1.20259e+06	1.35936e+06	984481	881793	1.26047e+06	1000190.3099999999	927527	1.38291e+06	1.01519e+06	1.05283e+06	912392	1.19737e+06	890885	1.00876e+06	1.22153e+06	1.09371e+06
C5-Branched dibasic acid metabolism	418845	345860	411126	472718	337053	299609	457326	369646.60000000003	336333.16000000003	469669	383316	322936	326000	406271	315232	357365.68000000005	403842	387753
Caffeine metabolism	402	290	1452	379	1124	708.7	3033	2935	1296	676	2887	963	2227	1793	2041	2339	935.5	1721
Calcium signaling pathway	13.5	2.33	592	108.4	150.5	381	11	60	20.5	104.5	282	32	185	178	566	452	60	44
Caprolactam degradation	123519	72980.2	121845.54000000001	185160	106406	65039.4	152606	124950	77575.1	209444.63999999998	107630	97733.3	82162	115074	60091.4	97690.3	162049.66999999998	87972.8
Carbapenem biosynthesis	91953.9	77403.2	93600.3	86913	73781.4	67862.9	91432.5	78577.3	74027.5	88144.8	86026.7	70491	64343.4	86181.70999999999	76513.8	81040.48000000001	67981.8	91405
Carbohydrate digestion and absorption	15269.3	19110.5	10677.5	9579.73	47202.8	60463.5	12793.9	8745.01	25918.2	26893	22192.8	18649.3	48099.990000000005	15301.5	28767.3	61803.15000000001	9127.16	19719.239999999998
Carbon fixation in photosynthetic organisms	743713	650195.1799999999	801509	767906	717350	760417	776617	661582	669270	780039	735383.3200000001	695645	735780	746167	698024.3200000001	811561	725982	829261
Carbon fixation pathways in prokaryotes	1.39614e+06	1.18705e+06	1.44558e+06	1.51682e+06	1.32171e+06	1.23048e+06	1.54158e+06	1.22626e+06	1.20126e+06	1531971	1.38858e+06	1294566.8800000001	1.34714e+06	1.49792e+06	1.23011e+06	1362902.6700000002	1296702.6300000001	1490929.6099999999
Carbon metabolism	4.26849e+06	3.61171e+06	4.50316e+06	4.81524e+06	4.11236e+06	3.93565e+06	4.74798e+06	3.91988e+06	3.5469e+06	4.96451e+06	4.17586e+06	3.92762e+06	3.909e+06	4.518e+06	3.69859e+06	4.35105e+06	4.13972e+06	4.39186e+06
Cardiac muscle contraction	61400.630000000005	39720	58736.40000000001	89358.9	83398.2	63414.52000000001	74263.3	56733.2	31372.989999999998	99798.31000000001	44530	47330.9	43600.649999999994	62349.4	30840.5	64287.2	50798.2	39111.7
Carotenoid biosynthesis	13963.4	20443.8	19143.3	17014.7	25293.3	17138.2	10041.7	11712.2	19723.8	25427	40376.8	17303.5	29772.9	24047	10471.2	27694.5	46364	31368.2
Cationic antimicrobial peptide (CAMP) resistance	390756	388132	371744	348086	552239	624362	406880.52999999997	281208	407875	460898	356581.16000000003	361752	453422.22000000003	344721	423287	637630	397299	480924
Cell cycle - Caulobacter	723783	621271	772054	719481	689965	639330	755629	644010	652139	745484	701602	662011	677493	684596	626908.3400000001	686054	690651	813622
Cellular senescence	0	0	592	49	147	172	11	60	14	79	224	32	185	109	88	452	60	44
Central carbon metabolism in cancer	298456	277519	307635	318414	276717	254021	321932	259397.47999999998	253446.18000000002	310172	300904.97000000003	274220	244439	306153	273596.66000000003	273717	293733	335448.58999999997
Chagas disease (American trypanosomiasis)	10038.5	13182	9475	10347	28612.5	34421.850000000006	11686.9	6730.51	13097.2	23370.7	26614.6	11096.7	33566.1	19287.260000000002	14428.3	38577.82000000001	8036.75	11641.8
Chemical carcinogenesis	154150	105704	151961	243404	132650	70077.74000000002	197951.87999999998	176283	92911.1	259544.19999999998	118954	128251.98999999999	79387.9	166652	60356.840000000004	92574.2	158473.08000000002	108717.68000000001
Chloroalkane and chloroalkene degradation	200209	134035	205957	297106	180638	144072	233512	211019	116831	279658	159839	166657	124915.59999999999	206753	123237	176636.52000000002	274833	156861.91999999998
Chlorocyclohexane and chlorobenzene degradation	88438.62000000001	56041	87590.1	136693	60592.8	39315.8	89290.5	77531.9	55673.46000000001	118465	72069.5	72298.2	43838	86429.5	44289.7	64203.5	133374	70699.62999999999
Choline metabolism in cancer	26214.7	17759.969999999994	23137.3	24774.8	26857.3	27986.240000000005	23212.450000000004	10258.5	15815.3	25211.4	23473.7	14694.9	23256.8	19167.9	16405.4	24289.6	18640.6	17448.6
Cholinergic synapse	0	0	0	0	0	0	0	0	0	0	8.25	0	0	0	171	0	0	0
Circadian entrainment	0	0	592	108.4	147	381	11	60	18.5	79	224	32	185	109	566	452	60	44
Citrate cycle (TCA cycle)	963807	847259	1013288.7300000001	1.04949e+06	981442	913598	1.11472e+06	839099	840998.4400000001	1.09508e+06	1.04023e+06	889045	1.01239e+06	1.06341e+06	892671.2000000001	1.02089e+06	894295	1.07291e+06
Cocaine addiction	12687.529999999999	11214.5	20546.8	21786.1	12501.3	1569.5300000000002	20810.1	21777.2	12492.3	22994.5	15844.4	10681.4	5458.67	17872.7	5358.67	7911	14891	19244.7
Colorectal cancer	62730.8	44967	65795.8	123940	39159.8	17817.5	82725.4	71013.1	18011.8	105426	48434.6	42302.2	28190.2	75054.5	15549.2	29103.5	73052	33099.9
Cyanoamino acid metabolism	309840	308191	359951	282844	312220	318304	309072	272161.91000000003	364874	281205	338189	291866	372395.38000000006	310693	313663.29000000004	353917	350745	390296
Cysteine and methionine metabolism	1.39633e+06	1.20226e+06	1.46212e+06	1.4259e+06	1.31585e+06	1.34967e+06	1.45645e+06	1.25296e+06	1.27032e+06	1.48877e+06	1.37534e+06	1.29543e+06	1.30182e+06	1.39023e+06	1.27956e+06	1.43179e+06	1.28852e+06	1498402.8800000001
Cytokine-cytokine receptor interaction	0	0	0	0	0	0	0	0	14	0	0	0	0	0	0	0	0	0
D-Alanine metabolism	136374	115629	136787.90000000002	124662	119032.09000000001	104434.15000000001	138418	121163	114299.23000000001	124926	126275	126041.51000000001	111929	131462	125000	111774.15000000001	117555	143771
D-Arginine and D-ornithine metabolism	17744.879999999997	11776.3	17404	28879.4	10516.8	698.7800000000001	22529.2	17704	6099.83	25978.4	10770.3	11773.5	4871.17	18366.940000000002	5096.17	3209	20838.3	10391.7
D-Glutamine and D-glutamate metabolism	191190.22000000003	174219.96999999997	203914	187741	181224	180176	207076	166021	174672.22000000003	192310	191196	179448.80000000002	179300.40000000002	194631	180984.12000000002	192484.46000000002	167511	223065
DNA replication	821365	720911.2699999999	863165	748460.2100000001	805025	831502	858602	702319	754972	811099	841777	780652	823586.4400000001	808674	811785	877219.8500000001	710101	943698
Degradation of aromatic compounds	340083	249542	354629	520082	265509	181425	393761	341943	209948	477478	256047	270746	183009	327334	187774	243314.36000000002	484941	256323
Dilated cardiomyopathy (DCM)	0	0	0	59.4	0	209	0	0	4.5	0	0	0	0	0	478	0	0	0
Dioxin degradation	33960.310000000005	25755.4	36309.729999999996	42042.3	24849.489999999998	8277.2	39659.7	38604.2	30692.8	43245.2	28151.2	32244.909999999996	13476.2	27991	18135.9	13970.2	45280.4	29734.1
Dopaminergic synapse	12687.529999999999	11214.5	21138.8	21835.1	12648.3	1741.5300000000002	20821.1	21837.2	12506.3	23073.5	16068.4	10818.4	5643.67	17981.7	5446.67	8363	15182.5	19288.7
Drug metabolism - cytochrome P450	180839.87000000002	125578.59999999999	187367	265903.88999999996	159207	78712.03000000001	226046.59999999998	209431.99000000002	126053.30999999998	278386	138280	150512	98158.1	188273	84530.8	113046	209940.33000000002	153548
Drug metabolism - other enzymes	626102.8500000001	530049	647448	705317	565266	528636	699972	611047.5299999999	517125	707849	595318.0700000001	582701	562012	659743	526688	568091	587647	639225
ECM-receptor interaction	0	0	360	0	0	0	0	0	1919	0	0	0	0	2	0	0	0	0
Endocrine and other factor-regulated calcium reabsorption	0	0	0	0	0	0	0	15.67	0	0	0	0	0	0	0	0	0	0
Endocytosis	100	269.07	226	5692.33	0	0	18.33	3.67	0	91	5	13.33	32	982	0	20	10656	19
Epithelial cell signaling in Helicobacter pylori infection	107553	88753.91999999998	119352.20000000001	105889	110901	140321	99851.2	87675.4	105579.59000000001	109966	83865.9	92420.40000000001	108822	87769.51999999999	106868	142671	120328	119103
Epstein-Barr virus infection	62730.8	44967	65795.8	123940	39159.8	17817.5	82725.4	71013.1	18011.8	105426	48434.6	42302.2	28190.2	75054.5	15549.2	29103.5	73052	33099.9
Estrogen signaling pathway	38882.3	36657.4	39856.4	22352.7	39710.8	48188.9	35373.4	24740.2	43220.8	27848.5	39190.740000000005	37179.3	45216	34808.6	42893.240000000005	45548.9	24574.300000000003	46373.4
Ether lipid metabolism	19385.8	12192.1	17738.1	10508.3	28283.6	33372.409999999996	15652.6	12364.5	22378.8	23708.1	15395.4	11997.869999999999	22842.100000000002	12547.7	20120.1	40355.8	27695.9	22763.9
Ethylbenzene degradation	15668.7	16081.2	16663.9	24640.660000000003	41043.8	40054.630000000005	28244.5	15232.3	17231	38128.8	31529.4	22769.9	31806.9	35311.2	20057.3	43524.810000000005	16895.2	13260.4
Fat digestion and absorption	135217	90792.8	145103	187935	96309.8	30066.7	168699	138734	87461	184446	121374	119816	57454.1	145347	71871.2	57135.240000000005	158916	106476
Fatty acid biosynthesis	823009.5599999999	680586	846070.1900000001	880606	804876	765526	932242	741251	692623	935496	848657	751644	783570.4400000001	846286.0900000001	731462	854533	750392	852597
Fatty acid degradation	651972	469731	681272	911113.9400000001	594504	409303.66000000003	862094	694393	446904	988131	613130	567064	465208	723856	425536	524931	717270	547620
Fatty acid elongation	0	488.25	3	23	0	0	207.25	672.25	0	157.75	186.5	237	0	151	2	0	0	0
Fatty acid metabolism	1.14343e+06	898371	1168990.4000000001	1.36199e+06	1.11725e+06	940493	1.38842e+06	1085358.0699999998	913592	1.49411e+06	1.1741e+06	1.03973e+06	992369.7000000001	1.23058e+06	923758	1.09316e+06	1.12052e+06	1.11081e+06
Fc gamma R-mediated phagocytosis	92	157.67	226	5692.33	0	0	18.33	3.67	0	91	5	13.33	32	982	0	20	10656	19
Ferroptosis	151122.96000000002	128833	167140	136048	141290.16999999998	153528	170181.69999999998	137405.30000000002	140554	155224.99999999997	145592	133822	179535.52000000002	155734.05000000002	139835	166580	108522	174346
Flagellar assembly	880958	751720.8400000001	925282.0100000001	995142.8200000001	1.06691e+06	1.00377e+06	939683	765704	786650.0499999999	1.20246e+06	765174	768257.0499999999	608401	848886	658128	1059078.6500000001	779842	774701.4400000001
Flavone and flavonol biosynthesis	7799.75	8447.5	6979.92	5366.18	7753.42	4333.25	6081.610000000001	6874.92	9254.17	4083.75	9996.08	5863.58	10400.5	9417.92	5510.74	4543.5	7614.25	9827.75
Flavonoid biosynthesis	5.6	75.4	595.4	1127.8	4834.8	3282.4	244	755.07	21.8	234.73	339.93	116.8	381.8	267	127	471	1165.4	55
Fluid shear stress and atherosclerosis	302449	244884	291756	358452	259683.22999999998	204897	334009	296546.51999999996	242370	359562	282096	259486.84999999998	221184.52000000002	308149.80999999994	208141.16000000003	229820	280104	283482
Fluorobenzoate degradation	44386.3	30063.370000000003	44186.6	55816.719999999994	31005.7	18530.8	50892.6	42866.280000000006	25970	54479.2	37173.8	31910.2	25440.379999999997	36286.9	19797.510000000002	34720.2	50030.8	38246.4
Folate biosynthesis	791590	668269	830981	821864	932388	939399.1900000001	915590	675514	686323	974113	823861	714233	912320	799021.0900000001	757224.8400000001	1.0243e+06	780121	854968
FoxO signaling pathway	73381.4	55989.4	78296.3	65267	90592.73000000001	90776.6	66119.6	53558.3	73044.5	70499	71585.26000000001	61130.5	80475.45999999999	67437.4	72243.7	100516.47000000002	82062.4	75925.42000000001
Fructose and mannose metabolism	774201	786759	866246	706624	781590	888362	759248	711963	768334	729037	745198.2100000001	759843	828076	726694.6900000001	788916	908474.5800000001	758050.9500000001	925909
Furfural degradation	1273.3200000000002	376	541.3199999999999	122.68	21.32	136	55.68	224	473.32	0	0	396	46.68	83.78	254.68	1036	260	1042.68
GABAergic synapse	176469.27999999997	147015.02000000002	192263	214832	147086	146136	197281.24999999997	163680.46000000002	152056	209676.97999999998	159336	154889	139905	180764	142669	163349.72000000003	178886	175899.33000000002
Galactose metabolism	760617	741809	840680	605225	665056	746390	703042.6699999999	664865	782733	555154	648986	699200	715128	659269	793639	769673	711158	966364
Gastric acid secretion	0	0	592	49	147	172	11	75.67	14	79	224	32	185	109	88	452	60	44
Geraniol degradation	114223	73461.5	104114	163362	130251	93181.3	166576	114177	92071.8	225945	128917	112572	104974	135884	78549.2	119557.70000000001	138014	79402.2
Glioma	0	0	592	49	147	172	11	60	14	79	224	32	185	109	88	452	60	44
Glucagon signaling pathway	258870	239689	271954.66000000003	244735.40000000002	232995.02000000002	235689.78999999998	248711	209744	238275.05000000002	216431	272227	241442.55000000002	230977	251648	257469.59000000003	246035	276026	301665
Glucosinolate biosynthesis	128823	110150.51999999999	125659	155838	99458.4	87995	146249	121884	103671.42000000001	151338	131080	110535.86000000002	103037.65000000001	138585	102961.15000000001	102675.90000000001	123888	125701.51000000001
Glutamatergic synapse	163011	135939	182624.33000000002	214932	122118.73999999999	109248	185624.26999999996	156161	136897.78999999998	193020.72999999998	151226	146242	119201.29999999999	173188	124434	122377.48000000001	184715.09999999998	156728.66999999998
Glutathione metabolism	573406	446497	553464	772692	580533.1900000001	464577.11000000004	710197	581063	415650	833265	527891	505102	459916.72000000003	604271	400555	543435	598580	485306
Glycerolipid metabolism	431699	372290	476701	460861	431876.52999999997	429189	464637	429660	356553	475635.48000000004	382076	383644.23000000004	336140	407583	375518	452338	443267	430171.04000000004
Glycerophospholipid metabolism	662753	559741	703599	677011	688951	702289	702057.5499999999	578241	582287	740773	595666	618192	611637	632762	608926	753915	643729	691287
Glycine, serine and threonine metabolism	1.61375e+06	1.31899e+06	1.67114e+06	1.94499e+06	1.44905e+06	1.36886e+06	1.84206e+06	1572569.8599999999	1254865.8800000001	1.91081e+06	1.50585e+06	1.42461e+06	1.36659e+06	1.69034e+06	1.3226e+06	1520911.9300000002	1.60329e+06	1.57106e+06
Glycolysis / Gluconeogenesis	1.58198e+06	1.39801e+06	1.71629e+06	1.57861e+06	1.52394e+06	1.53715e+06	1.68349e+06	1.44327e+06	1.46279e+06	1.59005e+06	1.53112e+06	1.50582e+06	1.52718e+06	1.56837e+06	1.5109e+06	1.66321e+06	1.55184e+06	1.78428e+06
Glycosaminoglycan degradation	135096	132058	134156	87009.20000000001	142892.97999999998	155659.02000000002	117740.23999999999	101448.20999999999	152151	102133	104418	110603	154933	104361	131809	171964	108607	184875.08000000002
Glycosphingolipid biosynthesis - ganglio series	75395.48999999999	78333.1	69075.5	35911.1	89116.2	110338	60467.5	48134.1	95101.3	52767.7	58653.6	64806.6	107555	49060.4	89949.8	124687.70999999998	60047.3	125053
Glycosphingolipid biosynthesis - globo and isoglobo series	131510	130719	135626	70425.4	140051	179787	105359	94237.7	157476	93304.4	93640.4	109987	160972	88031.26999999999	143725	194299.20999999996	86066.8	184096
Glycosphingolipid biosynthesis - lacto and neolacto series	0	0	9	90.4	0	0	0	0	0	0	0	192.4	0	0	0	0	0	0
Glyoxylate and dicarboxylate metabolism	1.571e+06	1.25069e+06	1633564.9000000001	2.05999e+06	1.38988e+06	1.22013e+06	1.83238e+06	1.51511e+06	1.13728e+06	2.00832e+06	1428854.4000000001	1.34368e+06	1.24605e+06	1.66267e+06	1.12129e+06	1.4144e+06	1.68373e+06	1.41319e+06
GnRH signaling pathway	92	157.67	818	5741.33	147	172	29.33	63.67	14	170	229	45.33	217	1091	88	472	10716	63
HIF-1 signaling pathway	340530	299061	360062	377545	295376	277419	378066	314651	270721	362986	355707	316584.54000000004	281969	359406	304198.94000000006	293343	314039	372788
Hematopoietic cell lineage	310	0	743	5	166	102	3	36	1919	128	0	0	8	41	0	251	88	0
Hepatitis B	62730.8	44967	65795.8	123940	39159.8	17817.5	82725.4	71013.1	18011.8	105426	48434.6	42302.2	28190.2	75054.5	15549.2	29103.5	73052	33099.9
Hepatitis C	62730.8	44967	65795.8	123940	39159.8	17817.5	82725.4	71013.1	18011.8	105426	48434.6	42302.2	28190.2	75054.5	15549.2	29103.5	73052	33099.9
Hepatocellular carcinoma	129252	89178.82999999999	120469	220334.62999999998	104317	48746.70000000001	170941.94999999998	162708.69999999998	79710.5	219630	104989	106776	64347.8	145641.00999999998	47721.8	68942.1	155064	92351.9
Herpes simplex infection	62730.8	44967	65795.8	123940	39167.8	17817.5	82725.4	71013.1	18011.8	105426	48434.6	42302.2	28190.2	75054.5	15549.2	29103.5	73052	33099.9
Histidine metabolism	687763	559071	706991	777778	661232	599581	770918	641013	576686	804454.0900000001	663699	560612	552521	695995	544851	658638	645509	698717.7999999999
Homologous recombination	1.12722e+06	998372	1211245.1300000001	983788.9600000001	1.10116e+06	1.16221e+06	1.16875e+06	959700	1.07561e+06	1.07534e+06	1.1441e+06	1.08243e+06	1.14437e+06	1.1098e+06	1137868.1300000001	1.21174e+06	951003	1.31568e+06
Human papillomavirus infection	60161.7	49808.7	60868.7	54766.200000000004	63232	66695.9	56801.9	47598.899999999994	56279.5	57957.6	56072.1	55286.5	59857.7	54798.7	58906.07000000001	71184.1	56897.7	65982.5
Huntington's disease	216903.77000000002	168334	226022.80000000002	296047.33999999997	237175.66999999998	192449.15000000002	249710	197430	150322	299055	198192	184313	193647.16999999998	224871	142900.58000000002	210690.52000000002	234374	172863
Hypertrophic cardiomyopathy (HCM)	18	1308.62	493	170.4	185.92	707.26	2786	335	755.5	118.5	1527	1431	1821.38	1949.17	1440.17	175.75	371	640
IL-17 signaling pathway	38954.3	36833.4	39490.4	22690.1	39571.8	48016.9	35431.8	24744.5	43227.8	27919.5	39092.9	37236.7	45044	35688.6	42805.240000000005	45096.9	24521.300000000003	46354.4
Indole alkaloid biosynthesis	7087.25	6553.25	9883.75	17832.4	3208	154.75	14626.1	10647.7	634.5	17015.8	5165.28	4921.15	795	11345.5	1035.5	651	327.75	5246
Inflammatory mediator regulation of TRP channels	0	0	592	49	147	172	11	60	14	79	224	32	185	109	88	452	60	44
Influenza A	62730.8	44970.7	65795.8	129255	39159.8	17817.5	82743.8	71016.8	18011.8	105426	48434.6	42315.6	28190.2	75054.5	15549.2	29106.5	83708	33099.9
Inositol phosphate metabolism	217383	173486.97000000003	263177	230360.55000000002	174379	140476	237004	240667	181334	218611	175526	174613.86000000002	165963	211247	161687	181068.34000000003	185187.69999999998	214550
Insect hormone biosynthesis	84163.8	56574.2	90699.3	147052	71522.6	49738	118120	105207	42264.8	132237	76682	67575.5	47438.4	97884	46848.8	65890.6	123093	59374.1
Insulin resistance	110766	95384.7	123976.26000000001	86149.7	94361.5	100909	104756	93431.3	108968.29999999999	79901.64000000001	99847.7	99229.5	101081	99520.9	110542.79000000001	104645	95178.45000000001	126440
Insulin secretion	0	1.5	0	59.4	0	209	0	15.67	4.5	0	0	0	0	0	478	0	0	0
Insulin signaling pathway	61960.4	67457	67184.4	55036.9	60570.7	71418.5	50063.4	44107.6	62228	45571.9	73350.1	57204.8	68652.3	64796.6	64914.7	71282.7	76780	72961.7
Isoflavonoid biosynthesis	0	0	0	0	0	0	946	0	0	43	0	0	0	0	275	4	9	0
Isoquinoline alkaloid biosynthesis	96026.07999999999	89435.8	108345.81000000001	124002.93000000001	93155.98000000001	83239.1	113211	95488	82947	119245	103580	90609.48000000001	98525.4	107872	83827.8	94521.3	108824	113259
Kaposi's sarcoma-associated herpesvirus infection	62802.8	45143	66613.8	124375.32999999999	39306.8	17989.5	82805.82999999999	71137.3	18046.8	105655	48784.8	42423.7	28388.2	76152.5	15637.2	29555.5	73119	33168.9
Legionellosis	279136	231121	301324.92000000004	329723	298203	275104	300782	253950.72999999998	226197	352549.04000000004	260229	230608.18000000002	248853.52000000002	280068.32999999996	212514.74000000002	312893	287072	272379
Leishmaniasis	72	176	226	386.4	0	0	69.4	64.2	21	150	126.2	89.4	13	989	0	0	7	25
Limonene and pinene degradation	148441	91659.51000000001	144697	234005	135367	94559.4	207948.41999999998	165244	90104.4	258713	136007	125631	99573.31999999999	155283	89395.43000000001	128763	203179.75999999998	105215
Linoleic acid metabolism	15077.1	11789.8	11893.6	9267.83	23685.7	32830.009999999995	13109	7899.25	14159.8	25615.2	19665.8	11373.7	25248.7	16067.9	15416.8	35679.2	4054.33	9854.59
Lipoic acid metabolism	77549.4	73068.4	72614.98000000001	85209.79000000001	77944.09999999999	70166.1	89308.95000000001	69347.95000000001	55963.3	92187.8	78273.2	69043.3	75150.7	83494.62000000001	74424.9	75810.6	73442.9	92652.2
Lipopolysaccharide biosynthesis	564390	527557	549402	549447.6900000001	715304	686784.9199999999	614088	471183	567164	665374	582011	544885	724532	562766	541205	704223.9700000001	425387.60000000003	635575
Long-term potentiation	0	0	592	49	147	172	11	60	14	79	224	32	185	109	88	452	60	44
Longevity regulating pathway	65706	50982.4	69606.6	61798.3	87842.40000000001	87398.1	61407.9	51313.630000000005	67293.6	69240.5	65888.01000000001	55050.5	77609.29000000001	59667.6	65519.1	95355.47000000002	75707.9	71194.8
Longevity regulating pathway - multiple species	134074	115737	150559	144658	156573.33000000002	147275	147929	138142.55000000002	136123.96000000002	157246	149662	128424	149762	150969	128688.11000000002	162616.30000000002	145539.90000000002	151733
Longevity regulating pathway - worm	370973.72000000003	294334	386432	429340.27999999997	382306	332254.16000000003	417856	358848	321077	462536	355694	326015	323176.16000000003	375506	295487.79000000004	368574	374899.37000000005	371053
Lysine biosynthesis	734201	620129.6900000001	772924	674023	648752	669901	758083	649184	654539	695851	691228	668865	647524	699675	687418	697559	604812.3300000001	805573
Lysine degradation	535766	393141	580806.2000000001	759997	451415.01999999996	305008	678743	558989	345985	775221	513884	497739.22000000003	359417	628650	360338	403195	598968.6900000001	428809
Lysosome	180280	195373	173536	92235.68000000001	169336	193287	141131.22999999998	123960	201499	96933	149967.03999999998	155046	235273	131541	185054	203643.70999999996	144210	265472.83999999997
MAPK signaling pathway - fly	51660	40754.5	49950	49130.3	60448.5	62710.3	51977.5	39582.8	45710.8	54933.9	50139.3	46660.4	60953.1	49742.7	49567.2	65877.23000000001	48218.8	52869.670000000006
MAPK signaling pathway - plant	93823.45999999999	76218.1	100591	102901	102187	86919.65000000001	91933.48000000001	78527.6	66527.6	104715	105254	74552.6	79906.31999999999	96082.8	78505.3	95852.7	93808.8	85585.7
MAPK signaling pathway - yeast	14046.1	10227.9	19656.6	12668	27393.890000000003	24687.840000000004	9430.44	11730.8	21582.800000000003	14306.6	15748.8	8390.04	16656.2	9924.88	15951.8	29478.2	27489	18325.1
Malaria	0	0	0	0	0	0	0	0	0	0	0	22	0	0	0	0	0	0
Measles	62730.8	44967	65795.8	123940	39159.8	17817.5	82725.4	71013.1	18011.8	105426	48434.6	42302.2	28190.2	75054.5	15549.2	29103.5	73052	33099.9
Meiosis - yeast	10352	11183.5	11711.8	26756.1	11858.4	2644.01	28556	37567.28999999999	12072	33182.3	23791	15135.6	15587.4	29986.6	9817	11971.8	14523.2	13306.8
Melanogenesis	1354	818.67	2732	5448.33	2406	195	250.33	1638.67	3400	866	2486.25	909.33	882	389	597	1787	15093	3516
Metabolic pathways	2.79013e+07	2.38485e+07	29474526.720000003	3.0323e+07	2.73931e+07	26959486.490000002	3.03726e+07	2.54499e+07	2.40714e+07	31221388	2.67438e+07	2.51992e+07	2.59728e+07	2.81657e+07	2.46315e+07	2.9491e+07	2.75422e+07	2.91172e+07
Metabolism of xenobiotics by cytochrome P450	175239.59000000003	120917.34999999999	176704	261950	149914	77297.25000000001	219863	198302.49000000002	114216	272431	127615	144752	93507.45999999999	181684.28999999998	80207.6	105786	195384.08000000002	139555.27000000002
Methane metabolism	1.11066e+06	966648	1.19672e+06	1.25563e+06	1.08409e+06	1.11368e+06	1.22017e+06	1.05138e+06	974687	1.27997e+06	1.01575e+06	1.04233e+06	1.02491e+06	1.14973e+06	1.00556e+06	1207851.1500000001	1.1123e+06	1.15964e+06
MicroRNAs in cancer	72145.1	78840.9	92451.73000000001	62232.840000000004	58852.509999999995	74938.6	65740.5	58768.530000000006	101441	71574.6	69354.5	66525.2	69970	70953.4	81879	74062.6	59571.4	94091.1
Microbial metabolism in diverse environments	7.49618e+06	6.24346e+06	7.96655e+06	9.11593e+06	7.27907e+06	7.01981e+06	8.42647e+06	7.01713e+06	6.00065e+06	9.20779e+06	7.16444e+06	6.70016e+06	6.6818e+06	7.88885e+06	6.22995e+06	7911809.600000001	8.01012e+06	7.36638e+06
Mineral absorption	64027.5	45685.8	75670.2	60337.5	60751.18000000001	58544.030000000006	59210.2	47732.4	43050.9	64010.53999999999	65194	49994.4	59213.7	61042.520000000004	52672.7	67021.9	51724.2	49186.4
Mismatch repair	945576	827853.5299999999	999276	829147	920815	971754	965680.8099999999	789698	887354.3400000001	896309	937278	892733.4600000001	929234	902036.6599999999	939032.1000000001	1.00315e+06	823545	1.1012e+06
Monobactam biosynthesis	326389	291746	330211	306981	337071.54000000004	363404	343223	273240	281475.97000000003	347529	353826	301206	348761	329542	315581	381090	274952.97000000003	375714
Monoterpenoid biosynthesis	0	0	0	0	0	0	0	0	0	0	0	0	34	0	0	0	0	0
N-Glycan biosynthesis	35405.8	36926.8	44331.6	17957.260000000002	31770	44012.1	27798.2	31456.5	44617.8	25655.4	37370.5	32331.6	51107.3	35608.5	39528	45610	22364.9	44376.2
NF-kappa B signaling pathway	72	176	226	386.4	0	0	69.4	64.2	21	150	126.2	89.4	13	989	0	0	7	25
NOD-like receptor signaling pathway	172429.41999999998	163304	177984.83000000002	136971	217786	230495	157994	137481.27999999997	178292	176715	181415	150638	183428	159064	166800	241590	149152	193655
Naphthalene degradation	68185.1	52250.6	70527.1	79444.4	79501.1	69467.7	73847.7	67947.6	48780.1	90921.04000000001	44024	55975.4	51805.979999999996	56122.4	53643.2	74291.6	81375.1	61319.9
Necroptosis	244120	206775.47999999998	266121	265786	196049	193544.78999999998	258446.73999999996	221619.52000000002	216879.28999999998	247391	218003.91000000003	218661.84999999998	196691.09999999998	234179	206395	206816	247354.65999999997	248222
Neomycin, kanamycin and gentamicin biosynthesis	65869.1	58691.5	70073.1	46305.770000000004	42158.3	42536.9	62962.2	60269.9	65284.8	34888.9	51125.6	59223.8	55511	51263.5	65428.32000000001	46781.5	51947.2	83878.51000000001
Neurotrophin signaling pathway	0	0	592	49	147	172	11	60	14	79	224	32	185	109	88	452	60	44
Nicotinate and nicotinamide metabolism	789918	652653	839729	812796	774369	799915	851547	694396	688682	859949	744210	707080	788955	779987	699175	875736.9400000001	688242	817596
Nitrogen metabolism	588158	490250	654195	664085	587634	594345	638622	556033.0700000001	533466	685956	583090	535384	587534	628339	509816	664913	607269	596709
Nitrotoluene degradation	36971.7	42919.9	37007.770000000004	52541.7	66874.4	84618.1	30936.6	16998.4	48112.020000000004	48183.130000000005	44215.1	43332.8	62747.130000000005	58397.6	43198.9	88657.4	75450.6	50912
Non-alcoholic fatty liver disease (NAFLD)	124131	84687.04000000001	124532.22000000002	213239	122558	81023.02000000002	157015	127731	49381.3	205225	92976.6	89633.2	71790.8	137408	45911.7	93394.20999999999	123852	72216.7
Non-homologous end-joining	9184.16	6676.5	13882.2	2134.34	13245.7	6893.0599999999995	13031.3	12584.3	15055.2	5329.01	20850.2	8606	9617.34	9415	12582.3	13409	14238	20092.3
Nonribosomal peptide structures	12311.6	10587.5	11489.1	15527.5	20884.2	22748.969999999998	13181.6	12068.2	14190.5	22898.8	13525.8	16767.3	14852.1	16763	12411	22782.1	23137	14918.1
Notch signaling pathway	0	64	0	55	0	0	0	181	0	0	0	0	0	0	0	0	0	0
Novobiocin biosynthesis	193265	168515	205343	213863	192307	185220	212899.93999999997	172775.88999999998	162373	217018	199128	170137	187941	200086	174432	201434.96000000002	179117	211811.59999999998
Nucleotide excision repair	453657	384718	482579	387687	407983	427435	465936	378008	431799	395991	446317	423956	437873	433720	446988.92000000004	458396.42000000004	398276.92000000004	532251
Olfactory transduction	0	0	592	49	147	172	11	60	14	79	224	32	185	109	88	452	60	44
One carbon pool by folate	709325	618144	736036.7000000001	694382	668702	680875	741180	618327.7000000001	644018.4600000001	724723	685745	662965	699955	706840	662457.8700000001	712052	633523.7300000001	797995
Oocyte meiosis	0	0	592	49	147	172	11	60	14	79	224	32	185	109	88	452	60	44
Other glycan degradation	281164	320679	297637	143868.05000000002	270087	346490	220610	198874	326613	152593	237681	258959	372287	196524	322598	345408	239982	449624.35000000003
Ovarian steroidogenesis	72	176	226	386.4	0	0	69.4	64.2	21	150	126.2	89.4	13	989	0	0	7	25
Oxidative phosphorylation	1.63474e+06	1387313.8900000001	1.67832e+06	1.8256e+06	1.78152e+06	1.6754e+06	1.82648e+06	1.45625e+06	1.3656e+06	1.82491e+06	1.60279e+06	1.45545e+06	1.67394e+06	1.64844e+06	1.45477e+06	1.82167e+06	1.69621e+06	1.74252e+06
Oxytocin signaling pathway	72	176	818	494.79999999999995	147	381	80.4	124.2	39.5	229	350.2	121.4	198	1098	566	452	67	69
PI3K-Akt signaling pathway	46579.6	41697.4	47966.07000000001	26033.339999999997	42316.2	51395.4	40074.119999999995	26924.9	48984.7	29156	44871.990000000005	43227.3	47911.1	43075.5	49540.9	50257.9	30872.800000000003	51060.1
PPAR signaling pathway	310610	239349.40000000002	317309	363906.32999999996	287108.83999999997	248963	384587	313201	233840	410714	287185.91000000003	263439	269404	324260.80000000005	233432	289437	270818	297254
Pancreatic cancer	92	157.67	226	5692.33	0	0	18.33	3.67	0	91	5	13.33	32	982	0	20	10656	19
Pancreatic secretion	14155.3	16259	10631.5	8954.73	46465.8	60444.5	11535.9	8111.01	25869.2	26442	22181.8	17434.3	48075.990000000005	15288.5	28767.3	60922.15000000001	8331.16	17273.239999999998
Pantothenate and CoA biosynthesis	904546	750258	959816	1.01323e+06	810904.1699999999	761718	1.03693e+06	852342	781479	1.01584e+06	863746	799677.1900000001	789394	924980	774542.2000000001	866624.6300000001	895003	920536
Parkinson's disease	213724	167985	219511	286990	205137	151883.27000000002	242193.34999999998	208548	139361	276733.72000000003	197511	173364	152524	226720	127754	174609.44999999998	200249	180438
Pathogenic Escherichia coli infection	160180	122548	165069.49000000002	250026	129444.06000000001	104025	199122.22999999998	165569.78999999998	84486	237595.78999999998	146376	129338	109527.98999999999	180209	92148.58000000002	123676	159946.97999999998	125100
Pathways in cancer	257203	190204	253291.21000000002	408738	215150	137029	322714	283262.69999999995	157851	390716	224391	211210.38999999998	161587	293420.94999999995	123932	170591	288717	195338
Penicillin and cephalosporin biosynthesis	37997.700000000004	29883.5	38060.7	43648.700000000004	19398.3	16006.719999999998	37051.4	37531.369999999995	29098.1	31090.4	29082.8	33409.6	21378.3	38372.7	21646.2	18372.4	39694.7	38552.9
Pentose and glucuronate interconversions	368530	392933	405726	399754	417353.45999999996	473271	364084	344803.95999999996	383687	375266	357678.91000000003	367230	421299	382078	385885	498868	473701.08999999997	457285
Pentose phosphate pathway	963547.6900000001	876656	1.03448e+06	949756	967092	1.0718e+06	985828	855606	856670	1.00488e+06	917711	890483	917153	945965	934093.4400000001	1.12685e+06	973730	1.07247e+06
Peptidoglycan biosynthesis	1016856.7000000001	884626.0499999999	1.08743e+06	866369.8500000001	957608.9400000001	981551	1.02815e+06	871484	996113	901428.4600000001	1.01247e+06	964417	973908	962973	1.01935e+06	1020342.2700000001	916567	1.17756e+06
Peroxisome	341250	280216	379018.51999999996	420297	347856	319017	408941	321483	288086	431520	341396	298072	341256	359520.22000000003	279858	358180.18000000005	364878	331810
Pertussis	76215.8	84709.6	76380.7	53584.270000000004	86273.5	83498.17000000001	65488.659999999996	51220.1	95140.5	70982.2	63167.5	66820	77836.1	56276.7	68289.12000000001	90566.42000000001	59553.990000000005	93707.1
Phenazine biosynthesis	97766.9	78465.9	106962.15000000001	94477.3	89254	84992.54000000001	103723	83386.1	78217.5	96160.8	91721.3	82612.3	84274.6	94954.1	82035.48999999999	86657.5	78957.5	94480.3
Phenylalanine metabolism	585128	476660	665447	937970	498752	347923	784164	654054	406725	890059	620444	514778	433229	710424	376714	464786.30000000005	744350	504323.08999999997
Phenylalanine, tyrosine and tryptophan biosynthesis	1.04261e+06	892681.3500000001	1.11997e+06	991272	975809	957127	1.07989e+06	872674	920208.4800000001	1011138.0499999999	1.01815e+06	907749	951870	1.01925e+06	956040	1010326.2300000001	912142	1.10237e+06
Phenylpropanoid biosynthesis	160308	169379	210983	123910.01999999999	162045.15999999997	152847	151497	143022	219803	115896	173919.50999999998	138209	195434	149067	155193	174119	172536.72999999998	219592
Phosphatidylinositol signaling system	151827	114466.98000000001	156251	154553	134257.28999999998	127449	159453	121000	104941.43000000001	158586	120531	113395	118494.88999999998	131501	108886	138086	112941	135815.58000000002
Phospholipase D signaling pathway	26214.7	17415.969999999994	23092.3	24774.8	26845.140000000003	27871.740000000005	23212.450000000004	10258.2	15812.3	25211.4	23465.4	14694.9	23256.8	19166.6	15306.4	24289.6	17596.6	17447.8
Phosphonate and phosphinate metabolism	151965	140040	127210.23000000001	256632	160014	173694	193590.86000000002	170631	92686.18000000001	255758.80000000002	126137	132467	130054	182353	110603	212268.96000000002	180210.08000000002	128060
Phosphotransferase system (PTS)	212683	260386	166116	146549	414207	507277	181761	205587	200346	293637	176738	217827	251594	128650	273835	480806	226551	223077
Photosynthesis	419003	373290	452830	440917	488678	507222	449211	375660.99000000005	340333.47000000003	466151	452006	412619.85000000003	461219	434551.04000000004	429072	523471	463150	425357
Phototransduction	0	5	592	49	147	172	11	101	707	79	239	52	185	144	113.17	452	65	44
Phototransduction - fly	0	0	592	49	147	172	11	60	14	79	224	32	185	109	88	452	60	44
Plant hormone signal transduction	0	0	0	0	5	0	0	0	0	0	0	0	0	0	0	0	0	0
Plant-pathogen interaction	257451	223806	270543	237038	320119	320680	255071	215908	257149	288953.93000000005	239006	228370	258501	230937	236249	332417	244887	291032
Platelet activation	0	0	360	0	0	0	0	0	1919	0	0	0	0	2	0	0	0	0
Platinum drug resistance	238125	169993	236300	382334	180668.86000000002	98605.97000000002	295632	263483	125883	371258	203235	188701	123621	268748	98338.4	133109	241918	160402
Polycyclic aromatic hydrocarbon degradation	24451.6	21984.8	28132.239999999998	62223.93000000001	10602.7	3661.25	42702.509999999995	33781.8	6888.16	53906.1	27127.5	19070.8	9311.33	40537	7186.51	8786.5	38025	11476.8
Polyketide sugar unit biosynthesis	206573	203711	229187	192460	157180	135789.80000000002	217760	195273	217289.10000000003	182102	221023.22999999998	193558	178093	188363	186185	162581.05000000002	175678	253312
Porphyrin and chlorophyll metabolism	1.05726e+06	861963	1.22187e+06	1.29673e+06	968612	897870	1.26247e+06	1.07379e+06	820329	1283589.1800000002	1.07077e+06	972509	825910.9500000001	1.2053e+06	871838	1050275.9000000001	1.09092e+06	977276
Primary bile acid biosynthesis	31517.6	25408.3	33392.7	24068.870000000003	23793.8	23045.3	26885.8	25154.1	27325.8	30109.670000000002	17503.9	30071.730000000003	20513.8	23718.3	23467.2	19236.9	20111.7	32240.6
Primary immunodeficiency	71542.4	58897.56999999999	74566.6	65196.7	104570	111672	70948.4	68725.1	70644	85233.5	74757.3	68146.6	91851.4	74024.73000000001	74834.15000000001	112796.98000000001	69044.3	80188
Prion diseases	131310	94151.5	138434	222162	134521	89485.22000000002	160660	133550	61699.3	212093.55000000002	103291	98146.2	77807.6	143342	51471.020000000004	97778.1	141855.66999999998	81824.8
Prodigiosin biosynthesis	281177	228211	292747	341992	231401	205852	342427	268464	228973.83000000002	325417.83999999997	275817.67000000004	260940.31999999998	232381.16999999998	297220.22000000003	234319.03999999998	237475	301999	286339.77999999997
Progesterone-mediated oocyte maturation	38882.3	36657.4	39264.4	22303.7	39563.8	48016.9	35362.4	24680.2	43206.8	27769.5	38966.740000000005	37147.3	45031	34699.6	42805.240000000005	45096.9	24514.300000000003	46329.4
Prolactin signaling pathway	14165.8	14979.7	15561.8	9836.33	18265.4	24480.3	15121.9	11772.7	13980.7	12895.3	21776.2	14007.2	18033.5	20946.5	19729.3	26908.6	12634.7	18265.8
Propanoate metabolism	1020403.4500000001	836549	1.05872e+06	1.24937e+06	936530	797462.0800000001	1.16668e+06	936351.7899999999	769630.2100000001	1.24903e+06	987406	959515	804998	1.13062e+06	805906.0900000001	920691	1.11466e+06	979944
Prostate cancer	38882.3	36657.4	39264.4	22303.7	39563.8	48016.9	35362.4	24680.2	43206.8	27769.5	38966.740000000005	37147.3	45031	34699.6	42805.240000000005	45096.9	24514.300000000003	46329.4
Proteasome	3079	2492	7232	956	3985	2668	9896.67	9680.67	6859	2891.67	10070	3701	7216.5	6904.5	7997	8957	4327.5	5618
Protein digestion and absorption	27387.8	33953.619999999995	34331.4	19258.4	26484.2	34514.5	31584.4	20842.2	39472.2	17702.760000000002	41569.7	36166.1	60020.54000000001	33516.8	39636.6	34671.2	29540.4	50530.3
Protein export	790985.1900000001	675180	816493	723991.6000000001	777301	764605	819425	675889	723351	774018	772372.3300000001	715316	749747	751324	747155	813786.2400000001	690225	884649
Protein processing in endoplasmic reticulum	77782.04000000001	68626.9	77688.8	41517.770000000004	70027.8	80973.4	67821.48999999999	51111.8	85604.48000000001	45005.2	79146.6	78849.6	86420.79999999999	69774.4	85275.1	81226.1	49562.96000000001	93617.8
Proteoglycans in cancer	54230.2	46699.8	56808	47916.630000000005	49688.1	49970	55433.1	45631.4	50557.630000000005	48875.5	53142.8	50882.6	51510.3	52106.3	52902.240000000005	52707.240000000005	47502.5	63709.5
Proximal tubule bicarbonate reclamation	37670.4	38826.4	42385.7	49439.3	34610.7	33457.990000000005	47183.6	30734.300000000003	29655.160000000003	50743.4	36941.8	32354.9	28729.8	46555.100000000006	29470.1	39471.740000000005	33832.2	39889.9
Purine metabolism	2.32176e+06	1.9698e+06	2.44611e+06	2.44019e+06	2.42111e+06	2.50648e+06	2.4555e+06	2.09858e+06	1975605	2.536e+06	2.23798e+06	2.12987e+06	2.308e+06	2.29139e+06	2.16451e+06	2.66268e+06	2.3189e+06	2.49295e+06
Pyrimidine metabolism	1.59423e+06	1.41015e+06	1.68263e+06	1.56812e+06	1.5642e+06	1.64927e+06	1.6589e+06	1.3926e+06	1446866.1500000001	1.5916e+06	1.57545e+06	1.50609e+06	1621396.9000000001	1.6146e+06	1536423.9100000001	1.73124e+06	1.47138e+06	1.80644e+06
Pyruvate metabolism	1626807.9000000001	1.32594e+06	1.67272e+06	1.81742e+06	1.64449e+06	1.58092e+06	1.79585e+06	1.46701e+06	1.31745e+06	1.88262e+06	1.54797e+06	1471545.1500000001	1.45354e+06	1.66296e+06	1432303.4100000001	1.74872e+06	1.66085e+06	1.66312e+06
Quorum sensing	2.34796e+06	1.82341e+06	2.31539e+06	3.26205e+06	2.01408e+06	1.92099e+06	2.71054e+06	2.46751e+06	1492715	2.99702e+06	2.0255e+06	1.97349e+06	1605142.9000000001	2.56024e+06	1.75227e+06	2125843.7800000003	2723821.5500000003	1.94652e+06
RIG-I-like receptor signaling pathway	2018.2	2723.79	3882.16	1842.5	219	381.33	1042.33	2012.68	1916	1059.83	228	2365.33	1336.58	3708.25	666.5	2634	142.25	981.5
RNA degradation	765035	688402	819475	752264	737463	763520	820594	652954	692288	783476.0700000001	795136	723239	765989	779641.0499999999	738972.1000000001	797146	692799	877772
RNA polymerase	200733	169847	208297	181982	186752	180634	205851.47999999998	172769	178356	185830	189567.83000000002	187486.30000000002	174190	190087	193434	189213	178620	225253.58000000002
RNA transport	67453.45999999999	70352.2	71307.3	46077.8	66933.81999999999	86198.1	70137.1	50867.7	77982.3	65094.880000000005	73088.6	69803.9	75226.7	63970.8	81706.3	77713.1	48027.2	88550.9
Rap1 signaling pathway	0	0	592	49	147	172	11	60	14	79	224	32	185	109	88	452	60	44
Ras signaling pathway	92	157.67	818	5741.33	147	172	29.33	63.67	14	170	229	45.33	217	1091	88	472	10716	63
Regulation of lipolysis in adipocytes	72	176	226	386.4	0	0	69.4	64.2	21	150	126.2	89.4	13	989	0	0	7	25
Renal cell carcinoma	26174.5	19067	26793.2	36032.2	32152.8	22276.3	33776.2	24732.8	16887	37571.3	31645.9	24849.6	24350.5	35945.8	17767.8	26996.5	25363.5	23469.2
Renin secretion	18	1308.62	1085	160	332.91999999999996	670.26	2797	395	765	197.5	1751	1463	2006.38	2058.17	1050.17	627.75	431	684
Renin-angiotensin system	16524.2	17810.579999999998	24401.8	12902.4	28623	30059.679999999997	24901.5	15706.8	27837	20908.8	36000	20051.7	39107.8	22748.839999999997	25529.839999999997	42746.6	18630	31735.2
Retinol metabolism	45645.3	31841.420000000002	50883.600000000006	51035.1	47926.6	29567.050000000003	49577.7	43971.130000000005	36273.7	53935.6	26165.3	37853.4	31233.1	39109.119999999995	33414.4	38271.490000000005	62932.5	47806.9
Retrograde endocannabinoid signaling	72	187	226	386.4	0	0	1041.4	64.2	24	187	138.2	89.4	13	993.5	269	7.5	17.5	30
Riboflavin metabolism	303148	265148	325882	308589	338888	359917.83999999997	353378	280739	278216.79000000004	358521	310136	279799	345786	312436	299205.92000000004	386943.72000000003	268198	358655.16000000003
Ribosome	2.90999e+06	2487881.3499999996	3.04099e+06	2.58234e+06	2.69248e+06	2.70962e+06	2.97422e+06	2.44582e+06	2.69458e+06	2646381.3400000003	2.85594e+06	2.72533e+06	2770066.2800000003	2.79125e+06	2841989.2600000002	2858139.6900000004	2491313.5900000003	3.35297e+06
Ribosome biogenesis in eukaryotes	69443.9	53381.119999999995	70827.7	56465.950000000004	85840.1	89325.7	73038.3	51649	64861.130000000005	77448.3	65992.7	62806.3	73005	63839.9	71309.90000000001	92203.7	50544.4	71760.2
Salivary secretion	14155.3	16259	11223.5	8944.33	46612.8	60407.5	11546.9	8171.01	25878.7	26521	22405.8	17466.3	48260.990000000005	15397.5	28377.3	61374.15000000001	8391.16	17317.239999999998
Salmonella infection	331433	283703	342618	388809.27999999997	347909	334175	356740	302349	262302	414150	327277.16000000003	279835	292210	340541	258970.13000000003	365121.08999999997	308575	321935
Secondary bile acid biosynthesis	97749.95000000001	80725.9	109722	110874	77070.3	68326.4	102726	94886.26000000001	82244.1	101944	73847.4	81309.2	60126.7	95143.26999999999	69941.3	66627.48999999999	87150.6	97903.7
Selenocompound metabolism	412923	374634	429250	429610	372550	365827	453353.01999999996	392533	371672	442287	450809.22000000003	412154	378852	441383.83999999997	375246.97000000003	404412	400610	456878.91000000003
Serotonergic synapse	12759.529999999999	11390.5	20772.8	22172.5	12501.3	1569.5300000000002	20879.5	21841.4	12513.3	23144.5	15970.6	10770.8	5471.67	18861.7	5358.67	7911	14898	19269.7
Sesquiterpenoid and triterpenoid biosynthesis	85.7	182.5	282	796	86	0	409	458	1.5	296	88	84	99	668.3299999999999	25	130	9	1771
Shigellosis	115728	103475	121681.53000000001	174717	148943	130937	129095	114361.84999999999	80630.2	189780	97456.5	85332.9	90226.9	122344	64656.5	153085	136768	99650.6
Signaling pathways regulating pluripotency of stem cells	0	0	12.5	0	0	39	0	0	0	0	0	0	0	0	0	0	0	0
Small cell lung cancer	62802.8	45143	66021.8	124326.32999999999	39159.8	17817.5	82794.82999999999	71077.3	18032.8	105576	48560.8	42391.7	28203.2	76043.5	15549.2	29103.5	73059	33124.9
Sphingolipid metabolism	211869	209410	222566	173844	222777	283545	189125	167358	224808	193162	156063	185219	249440	151360	224410.15000000002	285559	179846	293257
Sphingolipid signaling pathway	797	246.67	811	6479.33	297	102	976.33	4297.67	1478	1206	1242	270.33000000000004	51.5	2037	0	271	11249	345
Spliceosome	37	0	0	0	8	0	0	0	0	0	0	0	0	0	0	0	0	1508
Staphylococcus aureus infection	24617.7	15652.5	14877.7	19518.129999999997	18852.1	4733.68	13934.2	21549.9	4339.63	8898.15	9805.18	19182.4	1649.72	8562.42	29569.2	2986.33	61126.7	26753.5
Starch and sucrose metabolism	940723	965800.9500000001	1.08855e+06	691741.4400000001	998876	1.16693e+06	815021	835152	1.13593e+06	708959	940594.4700000001	925597	1.06593e+06	812274	1.0736e+06	1.19789e+06	996261	1.21114e+06
Staurosporine biosynthesis	13593	10925.919999999998	22292	1733	23102.3	799.26	11983	13868	34648	11218	24811	14620	9956.38	5743.53	8287.51	13743.2	44127	35344
Steroid biosynthesis	352	242	563	428	209	102	203	414	710	268	44	147	107	543.3299999999999	161	252	97	326
Steroid degradation	17499	6297	9775	25327	6287.69	2238	28428	7438.37	2636	54474.3	11726.5	16877	12831.5	15590.7	8690	6255	3580	9297
Steroid hormone biosynthesis	14433.8	10724	10588.2	7504.110000000001	6652.92	8005.25	10464.8	6964.17	12925.5	12511.1	3976.58	10601.6	7580.5	6447.37	9943.75	9385.5	4583.75	16968.5
Stilbenoid, diarylheptanoid and gingerol biosynthesis	5.6	75.4	595.4	1127.8	4834.8	3282.4	244	755.07	21.8	234.73	339.93	116.8	381.8	267	127	471	1165.4	55
Streptomycin biosynthesis	420321	381442.91000000003	453385	396148	332289	309071.16000000003	439378.89999999997	398050	402333	372976	386324	372926	356798	372537	374474.66000000003	358171	360616.70999999996	491086
Styrene degradation	112280	82361.6	110572.43000000001	250262	120831	86333.15000000001	168115	146703	65924.1	206009	138005	97971.4	88858.7	169420	68291.4	108467	224770	92806
Sulfur metabolism	594282	544013	611860	784400	580972	515067	672061	541674	476445	789416	632543	535259	568107	667649.0900000001	449776	620420	707527	601858
Sulfur relay system	386553.72000000003	306201	376267.04000000004	407982	428421	420683.69999999995	440021.95999999996	328513	304928.77999999997	500426.12000000005	390281	331352.16000000003	364549.52999999997	388805	328691	476101	337684	354578.79000000004
Synthesis and degradation of ketone bodies	216017	155170	235462.78000000003	326588	157812	48812.3	271555	226582	141045	298102	200888	201515	92698.8	247616	105544	81591.5	279686	159342
Systemic lupus erythematosus	37	0	44	0	1	0	5	8	46	55	46.25	18	40	39	0	0	0	1834
TNF signaling pathway	72	176	226	386.4	0	0	69.4	64.2	21	150	126.2	89.4	13	989	0	0	7	25
Taurine and hypotaurine metabolism	242389	191930	245104	293046.41000000003	281646	281062.92000000004	271616	226511	190155.58000000002	326622	226910	214171	239348	254577	210746	302126.41000000003	253822	240082
Terpenoid backbone biosynthesis	693559	569217	751570	673594	614653.1799999999	564704.4299999999	747738	613031	633053	694789	662918.3200000001	656531	593804.9400000001	683309	626097	624371	644229	757784.4299999999
Tetracycline biosynthesis	0	0	84	582	0	0	0	627	56	0	0	0	0	0	0	0	0	0
Th17 cell differentiation	38882.3	36657.4	39264.4	22303.7	39563.8	48016.9	35362.4	24680.2	43206.8	27769.5	38966.740000000005	37147.3	45031	34699.6	42805.240000000005	45096.9	24514.300000000003	46329.4
Thiamine metabolism	585432.3300000001	486037.04000000004	578798	493459	558688	604933.1799999999	596322	473474.48000000004	514371	545046	517831	514384.97000000003	522505	515979	545783	645826	515593	647385
Thyroid hormone signaling pathway	67852	72435	85373.6	42924.659999999996	57216	70474.46999999999	61265	53758.3	80571.6	39727.780000000006	73424.45000000001	62218.030000000006	64518.9	65482.810000000005	77616.1	67568.6	64546.7	101755.00999999998
Thyroid hormone synthesis	56351.04000000001	49295.8	57042.1	55875.1	67281	59333	64048.6	44533.1	54012.8	67591.3	60101.7	59433.5	70255.9	53590.96000000001	57140.8	68647.65000000001	61892.2	50985.2
Toll and Imd signaling pathway	7	319	12	0	0	0	0	0	0	0	0	0	0	8	0	0	1312	1223.75
Toluene degradation	32735.7	20680.8	39638.5	39690.6	25531.9	17121	27256.239999999998	19063.1	30224.1	30791.4	29364.4	24662.450000000004	17618.8	20808	17975.5	32080.2	60218.5	31149.2
Toxoplasmosis	62730.8	44967	65795.8	123940	39159.8	17817.5	82725.4	71013.1	18011.8	105426	48434.6	42302.2	28190.2	75054.5	15549.2	29103.5	73052	33099.9
Tropane, piperidine and pyridine alkaloid biosynthesis	161055	141538	170308	187362	164280	157647	175730	142289	135608	180093.88999999998	161686	146719.86000000002	162717	165688	146490	166450	170030	175137
Tryptophan metabolism	533745	403339	545540	836922.2200000001	482818	300183	718977	608319.0499999999	351990	838187	606970	464919	376618	628908	333617	409505.22000000003	683394	444100.27999999997
Tuberculosis	247536	197935	259515	298183	234354	231140	273787	230806.41999999998	174221	301444	217732.96000000002	206924	213600	243698	194070	259318	247306	239813.41999999998
Two-component system	2.85302e+06	2527318.5500000003	2955946.5700000003	3.22683e+06	3.36371e+06	3.36433e+06	2.9806e+06	2.5682e+06	2.51403e+06	3.67371e+06	2.60721e+06	2.47661e+06	2.51939e+06	2.76297e+06	2.40903e+06	3.6711e+06	3.28436e+06	2.77869e+06
Type I diabetes mellitus	69522.8	58498.5	70209.1	59338.6	75471.3	87710.35999999999	68074.5	54128.4	67515	66433.23000000001	63091.89000000001	61113.490000000005	73073	62289.009999999995	72915.8	96630.48000000001	63618.560000000005	83057.5
Type I polyketide structures	0	0	0	0	0	0	0	209	0	0	0	0	0	0	0	0	231.5	0
Type II diabetes mellitus	61203.7	52484.2	60688.7	55064.200000000004	63969	66923.9	57990.5	48168.7	56312	58258.6	55956.9	56412.1	59868.7	53822.7	59384.07000000001	72065.1	57686.7	68403.5
Tyrosine metabolism	433029	337930	477014	590307	464616.17000000004	402460.05000000005	510197	409415	305299	604745	401773	354217	362299.79000000004	451358.29000000004	310041	461412.94000000006	477717	366956
Ubiquinone and other terpenoid-quinone biosynthesis	368575	311729.58999999997	367030	368691	507262	497569	403606	300275	354001	478830	389000	333044	468544.29000000004	369036	353547	539107	312593	398256
VEGF signaling pathway	72	176	226	386.4	0	0	69.4	64.2	21	150	126.2	89.4	13	989	0	0	7	25
Valine, leucine and isoleucine biosynthesis	703255	565866	710764	769994	554835	514109.72000000003	770052	633343	584030	767893	655160	571550	543646	680444.5599999999	551223	604924	663463	661173.2999999999
Valine, leucine and isoleucine degradation	914315	689507	953911.8400000001	1.35329e+06	740312	441256	1.22785e+06	1001972	596624.4400000001	1.36674e+06	920831	815688	605938	1.0792e+06	535075	591480.1900000001	999527	736082
Vancomycin resistance	318159	276235	353579	265767	282906	286518	307361	268959	306845	260425	307961	305686.22000000003	285165	324178	309289	293159.36000000004	271818	371257
Various types of N-glycan biosynthesis	75395.48999999999	78350.1	69082.5	35916.1	89116.2	110338	60467.5	48141.1	95121.8	52785.7	58682.8	64816.6	107558	49064.9	89965.3	124705.20999999998	60065.8	125055
Vascular smooth muscle contraction	0	0	592	49	147	172	11	60	14	79	224	32	185	109	88	452	60	44
Vibrio cholerae infection	4774.16	1761	739.1600000000001	721.17	32434	48394.3	1747.8400000000001	610	5092.83	21691	4806.83	442.5	23878.2	1101.51	12111.8	48879.490000000005	97.17	3300.67
Viral carcinogenesis	60089.7	49632.7	60642.7	54379.8	63232	66695.9	56732.5	47534.7	56258.5	57807.6	55945.9	55197.1	59844.7	53809.7	58906.07000000001	71184.1	56890.7	65957.5
Viral myocarditis	62730.8	44967	65795.8	123940	39159.8	17817.5	82725.4	71013.1	18011.8	105426	48434.6	42302.2	28190.2	75054.5	15549.2	29103.5	73052	33099.9
Vitamin B6 metabolism	274886	238712	293358.54000000004	238409.21000000002	285742	295802	287568	228893	264437	279163	274229	262639	302329	267725	276258	321793	213292	302689
Xylene degradation	42966.7	32324.989999999998	39463.7	53694.7	30689.5	11226.9	47026.8	39851.7	34999.1	52568.2	40170.6	37525	19866.2	33163.7	28220.5	21258.7	77628.4	39074.6
Zeatin biosynthesis	66648.48000000001	59796.5	72962.2	52619.740000000005	61677.060000000005	66997.3	67593.9	54968.9	67337.45999999999	53256.4	64363.9	67417.79999999999	75285.1	62704.4	72277.5	67380.7	57596.1	81078.67000000001
alpha-Linolenic acid metabolism	29864.989999999998	25090.059999999998	29104.989999999998	29254.820000000003	63581.67999999999	73640.6	43860.770000000004	24050.7	31752	60305.979999999996	43547.7	33622.6	53358	47342.4	38437.9	82038.6	21736.1	24219.3
beta-Alanine metabolism	340912	235191	360726	450613.72000000003	288054	233979.61000000002	423176	330512	254743	467385	291296	295145	249949	340272	240972	304670	385247	288579
beta-Lactam resistance	600892	511798	628309	504428	694917	778981	537051	478725	562436	584425	517503.95999999996	534058	595602	512535.73000000004	582057	786702	604247.4500000001	686350.9700000001
cAMP signaling pathway	2105	1300.67	4814.33	6344.73	1913	1633	3889.33	3065.01	2863.5	1538	4533.25	1844.33	3008.5	4417	4171	4771	13172.5	2578
cGMP-PKG signaling pathway	0	0	592	49	147	172	11	75.67	14	79	224	32	185	109	88	452	60	44
mRNA surveillance pathway	37	0	0	0	0	0	0	0	0	0	0	0	0	0	0	0	0	1508
p53 signaling pathway	62730.8	44967	65795.8	123940	39159.8	17817.5	82725.4	71013.1	18011.8	105426	48434.6	42302.2	28190.2	75054.5	15549.2	29103.5	73052	33099.9
