# Supplementary material for: Effects of Undaria pinnatifida-derived brown algae polysaccharide (UPS) on the nutritional composition, digestive capacity, immune performance and intestinal microbiota of juvenile sea cucumber (Apostichopus japonicus)
Source: PeerJ. 2025 Aug 19;13:e19944. doi: 10.7717/peerj.19944 (PMC12372788; doi:10.7717/peerj.19944)
Supplement: Supplemental Information 8 — Raw data of the nutritional composition including polysaccharide content, protein content, lipid content, moisture and ash. [file peerj-13-19944-s008.xlsx]

## Sheet: Polysaccharide content
Polysaccharide content
	Concentration (0.1mg/ml)
Samle	Content（ug）	OD1	OD2	OD3	average
0	0	0.027	0.007	0.012	0.0153333
1	20	0.139	0.088	0.058	0.095
2	40	0.22	0.261	0.118	0.199667
3	60	0.333	0.373	0.367	0.357667
4	80	0.488	0.528	0.422	0.479333
5	100	0.53	0.599	0.588	0.572333
		浓度
Samle	OD540	Content（ug）	Concentration（ug/ml）	Volume（ml）	Total sugar content（mg）	Body wall weight（g）	Polysaccharide content (% wet weight)	Polysaccharide content (% dry weight)	average
HS0-1	0.146	25.7627	25.7627	100	2.57627	1.2511	0.20592	2.35877
HS0-2	0.191	33.3898	33.3898	100	3.33898	1.4315	0.233251	2.67183
HS0-3	0.187	32.7119	32.7119	100	3.27119	1.1272	0.290205	3.32422	2.78494
HS1-1	0.154	27.1186	27.1186		2.71186	1.0361	0.261738	2.99814
HS1-2	0.166	29.1525	29.1525		2.91525	1.3777	0.211603	2.42386
HS1-3	0.226	39.322	39.322		3.9322	1.5725	0.250061	2.86438	2.76213
HS2-1	0.246	42.7119	42.7119		4.27119	1.0941	0.390384	4.47175
HS2-2	0.332	57.2881	57.2881		5.72881	1.329	0.431062	4.93771
HS2-3	0.219	38.1356	38.1356		3.81356	1.1041	0.3454	3.95647	4.45531
HS3-1	0.215	37.4576	37.4576		3.74576	1.6939	0.221132	2.53302
HS3-2	0.249	43.2203	43.2203		4.32203	1.4316	0.301902	3.45822
HS3-3	0.22	38.3051	38.3051		3.83051	1.4413	0.265768	3.0443	3.01185
HS4-1	0.245	42.5424	42.5424		4.25424	1.6296	0.26106	2.99038
HS4-2	0.205	35.7627	35.7627		3.57627	1.4918	0.239729	2.74603
HS4-3	0.23	40	40		4	1.7035	0.234811	2.6897	2.8087
HS5-1	0.15	26.4407	26.4407		2.64407	1.5053	0.175651	2.01203
HS5-2	0.142	25.0847	25.0847		2.50847	1.0501	0.23888	2.73631
HS5-3	0.197	34.4068	34.4068		3.44068	1.1852	0.290304	3.32536	2.69123

## Sheet: Protein Content
Protein Content
Groups	Protein content (% wet weight)
HS0-1	0.035416	3.5416
HS0-2	0.042542	4.2542
HS0-3	0.040319	4.0319
HS1-1	0.046154	4.6154			Sample	Average	sd
HS1-2	0.044113	4.4113		1	HS0	3.94257	0.364603	b
HS1-3	0.041676	4.1676		2	HS1	4.3981	0.224192	ab
HS2-1	0.047924	4.7924		3	HS2	4.60537	0.16683	ab
HS2-2	0.044719	4.4719		4	HS3	4.98827	0.37646	a
HS2-3	0.045518	4.5518		5	HS4	4.15253	0.440064	b
HS3-1	0.045558	4.5558		6	HS5	4.31803	0.612329	ab
HS3-2	0.051664	5.1664
HS3-3	0.052426	5.2426
HS4-1	0.046341	4.6341
HS4-2	0.040522	4.0522
HS4-3	0.037713	3.7713
HS5-1	0.041073	4.1073
HS5-2	0.038389	3.8389
HS5-3	0.050079	5.0079

## Sheet: Lipid Content
Lipid Content
Sample	Dry weight	before	after	Content（% % dry weight）	Content (% wet weight)	Average
HS0-1	0.2738	1.3076	1.2398	24.7626	2.72389
HS0-2	0.2896	1.3436	1.2812	21.547	2.37017
HS0-3	0.3034	1.3404	1.2796	20.0396	2.20435	2.4328
HS1-1	0.2827	1.3219	1.2521	24.6905	2.71595
HS1-2	0.2764	1.3152	1.2485	24.1317	2.65449
HS1-3	0.3023	1.3398	1.2771	20.741	2.28151	2.55065
HS2-1	0.2825	1.3373	1.2697	23.9292	2.63221
HS2-2	0.2824	1.3192	1.2548	22.8045	2.5085
HS2-3	0.2934	1.326	1.2621	21.7791	2.39571	2.51214
HS3-1	0.2881	1.3261	1.2606	22.7352	2.50087
HS3-2	0.3047	1.3402	1.2751	21.3653	2.35018
HS3-3	0.2566	1.2939	1.2354	22.7981	2.50779	2.45295
HS4-1	0.2515	1.2912	1.2481	17.1372	1.88509
HS4-2	0.2635	1.2519	1.1944	21.8216	2.40038
HS4-3	0.2903	1.2681	1.2172	17.5336	1.92869	2.07139
HS5-1	0.2778	1.2816	1.2166	23.3981	2.57379
HS5-2	0.2722	1.2674	1.2097	21.1976	2.33174
HS5-3	0.2518	1.235	1.1869	19.1025	2.10127	2.3356

## Sheet: Moisture
Moisture
Sample	Sample weight	Wet weight	Dry weight	Moisture (% wet weight)
HS0-1	3.043	33.5494	30.8318	89.3066
HS0-2	3.0511	32.8397	30.1382	88.5418
HS0-3	3.0401	32.7618	30.0394	89.5497
HS1-1	3.1783	31.9329	29.1156	88.6417
HS1-2	3.0167	30.7231	28.1136	86.5018
HS1-3	3.1251	31.1453	28.4059	87.658
HS2-1	3.1526	31.9909	29.1873	88.9298
HS2-2	3.0673	33.6282	30.8678	89.9945
HS2-3	3.0635	32.273	29.5297	89.5479
HS3-1	3.072	33.3791	30.6226	89.7298
HS3-2	3.1695	31.6932	28.8947	88.2947
HS3-3	3.2019	30.8888	28.1783	84.6529
HS4-1	3.1105	34.2637	31.4414	90.7346
HS4-2	3.1524	34.0974	31.2376	90.7182
HS4-3	3.0046	32.372	29.6866	89.3763
HS5-1	3.0267	32.3482	29.6341	89.6719
HS5-2	3.1231	32.8415	30.0555	89.2062
HS5-3	3.1106	31.8605	29.0299	90.9985
Sample	Average	sd
HS0	0.891333	0.30465	ab
HS1	87.6	0.61849	b
HS2	89.49	0.30746	ab
HS3	87.5567	1.51161	b
HS4	90.2767	0.44834	a
HS5	89.96	0.53669	ab

## Sheet: Ash
Ash
Sample	Sample weight	Wet weight	Dry weught	Content	Ash (% wet weight)	Average
HS0-1	5.0385	24.9074	20.0217	0.0303265	3.03265
HS0-2	5.0828	25.8427	20.9408	0.0355906	3.55906
HS0-3	5.0578	26.3326	21.4948	0.0434972	4.34972	3.64714
HS1-1	5.0397	25.9499	21.1346	0.0445265	4.45265
HS1-2	5.1341	27.4406	22.5366	0.044818	4.4818
HS1-3	5.0708	25.4834	20.6331	0.0434843	4.34843	4.42762
HS2-1	5.0594	26.6395	21.8031	0.0440764	4.40764
HS2-2	5.1321	25.2724	20.364	0.0435884	4.35884
HS2-3	5.1821	26.1065	21.0881	0.0315895	3.15895	3.97514
HS3-1	5.0072	25.9446	21.0809	0.0286587	2.86587
HS3-2	5.0522	25.7502	20.8614	0.0323423	3.23423
HS3-3	5.1624	26.0256	21.0311	0.0325236	3.25236	3.11749
HS4-1	5.3517	26.6909	21.5153	0.0329054	3.29054
HS4-2	5.0259	27.3286	22.4805	0.0353767	3.53767
HS4-3	5.3482	25.2264	20.0749	0.0367787	3.67787	3.50203
HS5-1	5.0508	25.976	21.0913	0.0328859	3.28859
HS5-2	5.1056	25.598	20.6432	0.0295362	2.95362
HS5-3	5.0367	25.8324	20.9518	0.0309925	3.09925	3.11382
	Sample	Average	sd
	HS0	3.6471	0.38275	abc
	HS1	4.4276	0.04048	a
	HS2	3.9751	0.40834	ab
	HS3	3.1175	0.12592	c
	HS4	3.502	0.11322	bc
	HS5	3.1138	0.09697	c
