# Supplementary material for: Effects of Undaria pinnatifida-derived brown algae polysaccharide (UPS) on the nutritional composition, digestive capacity, immune performance and intestinal microbiota of juvenile sea cucumber (Apostichopus japonicus)
Source: PeerJ. 2025 Aug 19;13:e19944. doi: 10.7717/peerj.19944 (PMC12372788; doi:10.7717/peerj.19944)
Supplement: Supplemental Information 9 — Raw data of the digestive activities including cellulase, lipase, pepsin and amylase activity. [file peerj-13-19944-s009.xlsx]

## Sheet: Cellulase
Cellulase
Sample	Absorbance（1:1)	Cellulase activity（U/mgprot)	Average	Protein content（g/L)
HS0-1	0.032	3.38303		8.25083
HS0-2	0.053	1.72637		26.779
HS0-3	0.077	2.40416	2.50452	27.937
HS1-1	0.033	2.09325		13.7514
HS1-2	0.082	5.67969		12.5934
HS1-3	0.105	5.5994	4.45745	16.3569
HS2-1	0.256	12.6448		17.6597
HS2-2	0.329	15.9884		17.9492
HS2-3	0.201	14.9534	14.5289	11.7249
HS3-1	0.081	3.90486		18.0939
HS3-2	0.082	3.90486		15.6331
HS3-3	0.041	4.90486	4.23819	9.55359
HS4-1	0.078	5.73206		11.8696
HS4-2	0.049	2.66013		16.0674
HS4-3	0.058	3.92707	4.10642	12.8829
HS5-1	0.089	4.62341		16.7912
HS5-2	0.056	4.01734		12.1591
HS5-3	0.123	6.9271	5.18929	15.4884
	(U/mgprot)
Groups	Cellulase
HS0-1	3.38303
HS0-2	1.72637
HS0-3	2.40416
HS1-1	2.09325		Sample	Average	sd
HS1-2	5.67969		HS0	2.5	0.48	b
HS1-3	5.5994		HS1	4.46	1.18	b
HS2-1	12.6448		HS2	14.53	1	a
HS2-2	15.9884		HS3	4.24	0.33	b
HS2-3	14.9534		HS4	4.11	0.89	b
HS3-1	3.90486		HS5	5.19	0.89	b
HS3-2	3.90486
HS3-3	4.90486
HS4-1	5.73206
HS4-2	2.66013
HS4-3	3.94786
HS5-1	4.62341
HS5-2	4.01734
HS5-3	6.9271

## Sheet: Lipase
			Protein content（g/L)	Lipase activity（U/mgprot)	Average
Sample	A1	A2
HS0-1	0.779	0.751	3.30033	43.2069
HS0-2	0.868	0.787	10.7116	38.5108
HS0-3	0.949	0.81	11.1748	63.3472	48.355
HS1-1	0.813	0.767	5.50055	42.5896
HS1-2	0.797	0.734	5.03735	63.6929
HS1-3	0.87	0.782	6.54276	68.4974	58.26
HS2-1	0.782	0.697	7.06387	61.2814
HS2-2	0.811	0.721	7.17967	63.8396
HS2-3	0.806	0.744	4.68994	67.325	64.1487
HS3-1	0.811	0.766	5.21105	43.9784
HS3-2	0.781	0.708	6.25326	59.4523
HS3-3	0.753	0.703	3.82144	66.634	56.6882
HS4-1	0.826	0.766	4.74785	64.3587
HS4-2	0.852	0.749	6.42696	81.6176
HS4-3	0.828	0.753	5.15315	74.1209	73.3657
HS5-1	0.827	0.734	6.71646	70.5171
HS5-2	0.831	0.748	4.86365	86.9097
HS5-3	0.856	0.764	6.19536	75.6264	77.6844
Groups	Lipase
HS0-1	43.2069
HS0-2	38.5108		Sample	Average	sd
HS0-3	63.3472		HS0	48.36	7.62	c
HS1-1	42.5896		HS1	58.26	7.96	abc
HS1-2	63.6929		HS2	64.14	1.75	abc
HS1-3	68.4974		HS3	56.69	6.68	bc
HS2-1	61.2814		HS4	73.36	5	ab
HS2-2	63.8396		HS5	77.68	4.84	a
HS2-3	67.325
HS3-1	43.9784
HS3-2	59.4523
HS3-3	66.634
HS4-1	64.3587
HS4-2	81.6176
HS4-3	74.1209
HS5-1	70.5171
HS5-2	86.9097
HS5-3	75.6264

## Sheet: Pepsin
Pepsin
Sample	Sample	Control	Protein content（g/L)	Pepsin activity（U/mgprot)	Average
HS0-1	0.73	0.601	8.25083	2.45252
HS0-2	0.861	0.666	26.779	1.14225
HS0-3	0.753	0.644	15.937	1.07285	1.55587
HS1-1	0.749	0.63	13.7514	1.35744
HS1-2	0.738	0.679	12.5934	0.734903
HS1-3	0.745	0.653	12.3569	1.16788	1.08674
HS2-1	0.799	0.645	17.6597	1.36791
HS2-2	0.899	0.715	17.9492	1.60803
HS2-3	0.708	0.65	11.7249	0.775961	1.25063
HS3-1	0.827	0.718	18.0939	0.94496
HS3-2	0.645	0.611	7.23757	0.736896
HS3-3	0.645	0.603	9.55359	0.689608	0.80351
HS4-1	0.724	0.584	11.8696	1.85017
HS4-2	0.821	0.727	16.0674	0.917703
HS4-3	0.723	0.63	12.8829	1.13237	1.30008
HS5-1	0.718	0.633	16.7912	0.794069
HS5-2	0.775	0.684	12.1591	1.17398
HS5-3	0.759	0.68	13.4884	0.918727	0.962257
	Groups	Pepsin
	HS0-1	2.45252
	HS0-2	1.14225
	HS0-3	1.07285
	HS1-1	1.35744
	HS1-2	0.734903		Sample	Average	sd
	HS1-3	1.16788		HS0	1.56	0.45	a
	HS2-1	1.36791		HS1	1.09	0.18	a
	HS2-2	1.60803		HS2	1.25	0.25	a
	HS2-3	0.775961		HS3	0.79	0.08	a
	HS3-1	0.94496		HS4	1.3	0.28	a
	HS3-2	0.736896		HS5	0.96	0.11	a
	HS3-3	0.689608
	HS4-1	1.85017
	HS4-2	0.917703
	HS4-3	1.13237
	HS5-1	0.794069
	HS5-2	1.17398
	HS5-3	0.918727

## Sheet: Amylase
Amylase
Sample	Sample	Protein content（g/L)	Amylase activity（U/mgprot)	Average
HS0-1	0.304	0.165017	1.5946
HS0-2	0.218	0.53558	0.774881
HS0-3	0.245	0.55874	0.657423	1.00897
HS1-1	0.294	0.275028	1.02097
HS1-2	0.301	0.251867	1.06577
HS1-3	0.28	0.327138	0.933914	1.00688
HS2-1	0.312	0.353193	0.705015
HS2-2	0.257	0.358983	0.964214
HS2-3	0.225	0.234497	1.71707	1.12877
HS3-1	0.244	0.361878	1.01994
HS3-2	0.269	0.312663	1.03928
HS3-3	0.277	0.191072	1.6267	1.22864
HS4-1	0.263	0.237392	1.41344
HS4-2	0.252	0.321348	1.10462
HS4-3	0.259	0.257657	1.32969	1.28258
HS5-1	0.214	0.335823	1.25684
HS5-2	0.285	0.243182	1.22003
HS5-3	0.228	0.309768	1.28274	1.2532
Groups	Amylase
HS0-1	1.5946
HS0-2	0.774881			Sample	Average	sd
HS0-3	0.657423			HS0	1.01	0.29	a
HS1-1	1.02097			HS1	1.01	0.04	a
HS1-2	1.06577			HS2	1.13	0.3	a
HS1-3	0.933914			HS3	1.23	0.2	a
HS2-1	0.705015			HS4	1.28	0.09	a
HS2-2	0.964214			HS5	1.25	0.02	a
HS2-3	1.71707
HS3-1	1.01994
HS3-2	1.03928
HS3-3	1.6267
HS4-1	1.41344
HS4-2	1.10462
HS4-3	1.32969
HS5-1	1.25684
HS5-2	1.22003
HS5-3	1.28274
