# Supplementary material for: Effects of Undaria pinnatifida-derived brown algae polysaccharide (UPS) on the nutritional composition, digestive capacity, immune performance and intestinal microbiota of juvenile sea cucumber (Apostichopus japonicus)
Source: PeerJ. 2025 Aug 19;13:e19944. doi: 10.7717/peerj.19944 (PMC12372788; doi:10.7717/peerj.19944)
Supplement: Supplemental Information 10 — Raw data of the immune performance including T-SOD, T-AOC activity, H 2 O 2 and MDA content. [file peerj-13-19944-s010.xlsx]

## Sheet: T-SOD
T-SOD
Sample	Absorbance	T-SOD(U/ml)	Average
HS0-1	0.386	246.727
HS0-2	0.371	226.125
HS0-3	0.357	242.875	238.576				吸光度
HS1-1	0.342	294.975
HS1-2	0.369	265.368
HS1-3	0.324	282.357	280.9
HS2-1	0.276	367.349
HS2-2	0.324	314.714
HS2-3	0.283	331.411	337.824
HS3-1	0.311	328.969
HS3-2	0.286	356.383
HS3-3	0.289	324.232	336.528
HS4-1	0.312	327.872
HS4-2	0.34	297.169
HS4-3	0.296	315.857	313.633
HS5-1	0.351	285.106
HS5-2	0.311	297.911
HS5-3	0.349	252.446	278.488
Groups	T-SOD
HS0-1	246.727
HS0-2	226.125
HS0-3	242.875		Sample	Average	sd
HS1-1	294.975		HS0	238.58	6.32	c
HS1-2	265.368		HS1	280.9	8.58	b
HS1-3	282.357		HS2	337.82	15.53	a
HS2-1	367.349		HS3	336.53	10.02	a
HS2-2	314.714		HS4	313.63	8.93	ab
HS2-3	331.411		HS5	278.49	13.54	b
HS3-1	328.969
HS3-2	356.383
HS3-3	324.232
HS4-1	327.872
HS4-2	297.169
HS4-3	315.857
HS5-1	285.106
HS5-2	297.911
HS5-3	252.446

## Sheet: T-AOC
T-AOC
Sample	Absorbance	T-AOC(U/mL)	Average
HS0-1	0.115	2.81533
HS0-2	0.144	2.97933
HS0-3	0.109	2.02267	2.60578
HS1-1	0.116	2.84267
HS1-2	0.129	3.198
HS1-3	0.129	2.56933	2.87
HS2-1	0.108	2.624
HS2-2	0.154	3.25267
HS2-3	0.129	2.56933	2.81533
HS3-1	0.15	3.772
HS3-2	0.162	4.1
HS3-3	0.148	3.08867	3.65356
HS4-1	0.146	3.66267
HS4-2	0.161	3.444
HS4-3	0.173	3.772	3.62622
HS5-1	0.179	4.56467
HS5-2	0.131	3.25267
HS5-3	0.154	3.25267	3.69
Groups	T-AOC
HS0-1	2.81533
HS0-2	2.97933
HS0-3	2.02267
HS1-1	2.84267	Sample	Average	sd
HS1-2	3.198	HS0	2.61	0.3	b
HS1-3	2.56933	HS1	2.87	0.18	ab
HS2-1	2.624	HS2	2.82	0.22	ab
HS2-2	3.25267	HS3	3.65	0.3	a
HS2-3	2.56933	HS4	3.63	0.1	a
HS3-1	3.772	HS5	3.69	0.44	a
HS3-2	4.1
HS3-3	3.08867
HS4-1	3.66267
HS4-2	3.444
HS4-3	3.772
HS5-1	4.56467
HS5-2	3.25267
HS5-3	3.25267

## Sheet: H2O2
H2O2
Sample	Absorbance	H2O2(mmol/L）	Average
HS0-1	0.096	37.7474
HS0-2	0.094	38.5353
HS0-3	0.087	35.4348	37.2392
HS1-1	0.122	48.9
HS1-2	0.132	53.1895
HS1-3	0.144	60.6821	54.2572
HS2-1	0.153	62.1974
HS2-2	0.145	61.125
HS2-3	0.167	70.8696	64.7306
HS3-1	0.126	50.6158
HS3-2	0.137	55.3342
HS3-3	0.117	48.7228	51.5576
HS4-1	0.137	55.3342
HS4-2	0.115	45.8974
HS4-3	0.133	55.8098	52.3471
HS5-1	0.107	42.4658
HS5-2	0.107	44.2935
HS5-3	0.096	39.4212	42.0602
Groups	H2O2
HS0-1	37.7474
HS0-2	38.5353
HS0-3	35.4348	Sample	Average	sd
HS1-1	48.9	HS0	37.24	0.93	c
HS1-2	53.1895	HS1	54.26	3.44	b
HS1-3	60.6821	HS2	64.73	3.09	a
HS2-1	62.1974	HS3	51.56	1.97	b
HS2-2	61.125	HS4	52.35	3.23	b
HS2-3	70.8696	HS5	42.06	1.42	c
HS3-1	50.6158
HS3-2	55.3342
HS3-3	48.7228
HS4-1	55.3342
HS4-2	45.8974
HS4-3	55.8098
HS5-1	42.4658
HS5-2	44.2935
HS5-3	39.4212

## Sheet: MDA
MDA
Sample	Absorbance	MDA(nmol/mL)	Average
HS0-1	0.046	1.65289
HS0-2	0.058	1.05096
HS0-3	0.049	0.764331	1.15606
HS1-1	0.06	1.11465
HS1-2	0.063	1.21019
HS1-3	0.038	0.991736	1.10553
HS2-1	0.034	0.661157
HS2-2	0.038	0.991736
HS2-3	0.046	0.66879	0.773894
HS3-1	0.033	0.578512
HS3-2	0.032	0.495868
HS3-3	0.032	0.22293	0.432437
HS4-1	0.047	1.73554
HS4-2	0.08	1.75159
HS4-3	0.092	2.13376	1.87363
HS5-1	0.045	1.57025
HS5-2	0.082	1.81529
HS5-3	0.067	1.33758	1.57437
Groups	MDA
HS0-1	1.65289
HS0-2	1.05096
HS0-3	0.764331	Sample	Average	sd
HS1-1	1.21019	HS0	1.16	0.26	bc
HS1-2	1.11465	HS1	1.11	0.06	bc
HS1-3	0.991736	HS2	0.77	0.11	cd
HS2-1	0.661157	HS3	0.43	0.11	d
HS2-2	0.991736	HS4	1.87	0.13	a
HS2-3	0.66879	HS5	1.57	0.14	ab
HS3-1	0.578512
HS3-2	0.495868
HS3-3	0.22293
HS4-1	1.73554
HS4-2	1.75159
HS4-3	2.13376
HS5-1	1.57025
HS5-2	1.81529
HS5-3	1.33758
