# Supplementary material for: Effects of Undaria pinnatifida-derived brown algae polysaccharide (UPS) on the nutritional composition, digestive capacity, immune performance and intestinal microbiota of juvenile sea cucumber (Apostichopus japonicus)
Source: PeerJ. 2025 Aug 19;13:e19944. doi: 10.7717/peerj.19944 (PMC12372788; doi:10.7717/peerj.19944)
Supplement: Supplemental Information 11 — Raw data for flower plot, coreOTUs and β diversity analysis. [file peerj-13-19944-s011.xlsx]

## Sheet: ASV flower
ASV_ID	HS0-2	HS0-1	HS0-3	HS1-1	HS1-2	HS1-3	HS2-1	HS2-2	HS2-3	HS3-1	HS3-2	HS3-3	HS4-1	HS4-2	HS4-3	HS5-1	HS5-2	HS5-3
1	2966	1473	3428	883	3431	5142	5202	2011	4198	633	4449	4358	9452	5051	2924	8792	1179	4471
2	1504	481	111	214	6140	10674	377	31	0	4894	1144	49	4995	215	2261	13978	0	888
3	311	289	32	1084	446	43	2806	11551	754	3461	380	1973	136	2841	0	0	21	0
4	0	11	0	15607	0	0	55	11	0	0	0	40	0	0	0	9	30517	0
5	2988	1302	7390	3611	369	17	1947	1101	0	1670	0	633	4	775	0	13	0	17
6	374	2334	0	5212	0	0	3931	479	0	6023	1920	1721	183	3657	0	0	0	0
7	1232	768	2130	0	2169	22	48	1335	2641	590	2258	821	697	272	509	1141	4146	3300
8	37	0	46	28	4988	5249	0	22	728	3067	476	135	4112	225	1903	1961	0	9
9	231	1396	0	1031	75	0	518	875	20	3327	9018	2448	660	1624	327	17	0	0
10	251	41	768	117	961	536	2245	2430	948	492	2523	97	1884	1060	1241	1697	570	1210
11	0	1031	875	0	3772	3956	1616	1156	1132	0	24	2694	921	932	882	1104	324	0
12	904	534	2276	0	21	0	1248	31	1395	0	27	1266	2769	2767	0	0	447	1343
13	366	68	20	749	103	0	812	4258	68	728	1207	217	0	832	0	0	0	0
14	170	0	120	0	3822	2240	109	0	183	1747	441	0	1609	0	648	4277	0	0
15	1922	468	806	310	0	0	276	114	69	894	1336	2035	12	1309	594	155	0	0
16	25	1097	41	1220	166	0	117	56	80	718	1469	90	4916	3889	0	0	0	377
17	1790	736	713	530	1102	475	0	0	1556	817	10	2625	1459	1140	1175	9	391	0
18	0	0	1712	0	1042	0	972	15	1114	185	0	1639	0	0	2635	1074	1803	869
19	0	1534	0	614	1067	889	0	804	9	0	0	0	0	1546	1277	0	1724	2068
20	294	239	240	602	974	10	742	4009	0	857	333	416	0	162	0	0	17	146
21	1588	70	988	128	285	210	150	901	2645	99	26	768	100	316	826	420	134	272
22	0	536	6	0	8	714	0	9	19	0	1815	568	0	764	2068	9	1414	2499
23	393	176	536	1838	519	111	1753	720	0	942	354	345	100	123	436	15	96	0
24	0	5	0	982	4647	2950	0	148	0	0	0	0	0	0	0	0	0	0
25	0	0	0	19	2046	0	0	0	1256	0	0	0	0	915	2582	0	439	1035
26	0	505	0	373	514	0	915	115	0	739	0	56	0	0	0	0	0	422
27	0	0	1372	0	926	856	0	734	0	0	0	0	0	0	1000	1169	0	1209
28	0	958	123	673	268	0	176	374	0	1094	2015	1088	0	403	0	0	0	0
29	0	64	0	19	0	0	2532	85	0	12	1238	0	0	1690	862	12	0	0
30	291	131	0	868	6	0	784	14	0	1246	40	641	0	49	47	0	0	0
31	626	171	0	2194	104	0	396	63	0	1362	90	107	0	249	0	0	0	0
32	0	13	1327	0	0	0	0	0	0	12	10	2518	9	1947	5	5	0	0
33	382	41	0	734	61	0	921	0	44	2370	151	255	204	460	0	0	0	0
34	0	593	555	0	0	0	0	0	0	0	0	1463	0	0	1526	649	1188	0
35	66	0	0	39	735	0	7	0	0	104	122	0	176	0	0	1175	0	266
36	0	677	0	0	10	2073	587	895	0	0	0	0	0	4	0	4	0	1057
37	508	0	872	74	14	19	83	66	210	41	0	62	461	157	25	729	30	188
38	41	101	16	1198	0	0	319	22	0	782	0	91	245	261	0	0	0	0
39	837	0	1400	0	0	0	0	0	0	0	826	0	0	0	0	826	0	0
40	980	537	0	0	0	0	0	0	3672	17	24	0	0	0	0	0	35	0
41	0	84	0	0	0	4	852	395	1419	847	0	0	0	420	0	0	0	771
42	0	4624	0	0	0	0	0	0	0	0	0	0	0	0	0	0	0	0
43	0	0	698	0	0	0	0	0	0	0	36	0	0	0	0	1142	0	1714
44	1183	351	0	296	0	748	0	0	0	0	899	0	0	0	1073	0	0	0
45	725	66	1062	15	48	48	395	112	0	143	0	630	8	45	69	110	137	226
46	175	1224	0	610	0	0	367	61	0	308	62	0	0	1321	0	0	0	0
47	0	68	0	425	0	0	480	0	0	1320	487	0	0	287	262	0	0	0
48	0	206	0	2017	573	0	307	132	0	87	229	43	0	523	0	0	0	0
49	0	6	36	0	108	0	0	0	0	0	0	0	0	0	372	0	2958	914
50	1216	0	876	0	0	0	0	0	0	798	0	1368	0	0	0	0	0	0
51	32	0	84	0	0	0	322	655	21	0	0	450	696	610	892	416	0	0
52	50	88	121	0	0	382	456	166	145	358	135	75	597	28	326	428	0	51
53	0	29	0	664	0	0	32	31	0	1241	605	30	0	688	0	0	0	0
54	0	520	1057	0	0	825	0	982	0	0	0	0	0	0	0	0	0	0
55	0	469	0	255	411	61	606	137	611	0	327	281	0	10	9	193	215	0
56	0	0	0	295	0	0	0	0	0	0	0	0	0	0	1463	0	876	0
57	0	0	427	0	0	0	0	0	121	175	0	0	0	2780	0	0	0	0
58	223	0	271	92	16	96	23	0	355	0	0	39	35	56	191	777	195	782
59	0	0	805	451	400	0	0	0	0	472	0	0	0	452	0	212	373	0
60	0	0	1567	0	5	0	0	5	15	6	0	1692	8	14	7	0	11	17
61	290	0	567	0	18	97	123	21	0	122	0	505	81	1122	0	0	317	22
62	0	1502	0	0	0	0	1156	634	0	0	11	0	0	13	0	0	0	0
63	0	5	0	0	190	3027	0	0	0	0	0	0	59	0	0	0	0	0
64	1132	0	0	0	0	0	0	1134	0	0	0	0	0	0	0	0	0	0
65	0	0	0	0	0	0	0	0	1631	0	0	0	1587	0	0	0	0	0
66	0	0	0	0	0	0	357	188	0	433	331	228	555	426	0	0	0	0
67	13	1516	0	0	0	0	0	1099	66	46	55	40	34	29	39	33	36	21
68	820	29	0	0	0	0	0	0	0	0	0	0	2219	0	0	0	0	11
69	1476	0	0	0	59	0	0	0	0	0	0	0	0	0	0	1531	0	0
70	0	0	10	29	0	0	512	175	0	102	0	369	0	21	0	0	0	88
71	0	0	0	0	0	9	0	1162	0	446	0	0	0	847	0	0	0	0
72	1088	0	0	0	0	0	0	0	0	0	0	0	0	0	0	0	0	1796
73	0	0	0	0	0	0	4	0	0	9	1600	0	1207	0	0	0	0	0
74	224	0	0	724	0	0	101	276	0	1076	0	0	76	207	0	0	0	0
75	0	12	0	0	0	0	1274	0	1372	0	0	0	18	12	0	25	0	0
76	0	0	0	0	0	0	0	0	0	0	0	0	0	0	0	0	0	1675
77	1274	0	0	0	0	0	0	0	0	0	0	0	0	0	0	1417	0	5
78	0	0	329	0	0	0	27	0	0	350	0	0	0	0	932	64	848	10
79	0	0	0	0	0	1169	0	0	0	0	0	0	0	0	0	0	0	1478
80	0	0	0	0	0	0	0	0	0	0	0	0	0	0	0	0	0	2578
81	37	0	1718	0	0	0	808	0	0	0	0	0	0	0	0	0	0	0
82	0	0	0	0	190	0	187	0	0	0	0	0	0	0	0	408	0	0
83	0	0	0	0	0	0	0	0	1781	0	0	0	0	0	0	0	500	0
84	0	0	0	0	420	0	0	0	0	0	0	0	0	0	0	708	0	0
85	0	0	0	0	0	0	0	0	0	0	0	2461	0	0	0	0	0	0
86	46	217	14	167	0	0	762	0	0	226	0	328	0	0	0	0	0	470
87	0	0	20	0	916	0	0	34	22	0	0	0	9	1087	38	0	0	0
88	0	447	0	0	0	0	0	0	1895	0	0	0	0	0	0	0	0	0
89	30	0	0	0	1397	471	0	0	0	0	0	0	144	0	0	300	0	0
90	0	0	0	0	0	828	0	10	0	0	0	0	0	0	0	720	0	0
91	822	406	283	0	401	0	0	0	0	18	0	0	0	0	37	0	0	307
92	122	0	0	363	0	0	1496	118	0	137	0	0	0	0	0	0	0	0
93	0	120	0	47	0	0	347	135	0	180	561	447	0	0	0	0	0	0
94	0	0	0	0	0	0	0	0	1172	0	0	0	0	1035	0	0	0	0
95	0	0	5	763	668	0	0	0	17	0	10	16	9	527	0	0	0	0
96	0	0	0	0	0	0	0	0	0	0	0	0	0	0	0	2189	0	0
97	0	408	0	0	0	0	0	0	0	1097	276	100	0	81	0	0	0	24
98	0	0	0	293	0	0	0	0	0	0	1446	0	0	0	0	0	0	0
99	151	249	73	7	0	0	83	0	183	76	0	132	0	518	438	67	0	0
100	274	28	0	300	686	0	4	0	0	0	0	0	0	225	0	0	0	0
101	0	0	0	0	0	0	0	0	2090	0	0	0	0	0	0	0	0	0
102	0	0	0	0	0	2085	0	0	0	0	0	0	0	0	0	0	0	0
103	0	0	0	0	0	0	2081	0	0	0	0	0	0	0	0	0	0	0
104	0	0	0	0	0	0	0	0	0	0	0	2059	0	0	0	0	0	0
105	0	0	0	0	0	0	0	0	2057	0	0	0	0	0	0	0	0	0
106	1094	0	0	0	0	0	0	0	0	0	0	0	0	929	0	0	0	0
107	0	0	226	304	0	0	0	0	0	0	0	0	0	960	0	0	0	19
108	0	0	0	0	0	0	0	0	1029	0	0	0	0	0	981	0	0	0
109	0	0	0	0	0	0	0	0	2008	0	0	0	0	0	0	0	0	0
110	0	0	0	0	0	0	0	0	0	0	0	1215	0	0	0	0	789	0
111	0	483	3	23	0	0	172	613	0	122	0	138	0	151	0	0	0	0
112	263	0	806	241	0	0	66	0	0	177	0	0	92	0	0	0	0	0
113	0	0	0	0	0	0	0	0	1919	0	0	0	0	2	0	0	0	0
114	0	201	58	371	1223	0	0	0	0	26	39	0	0	0	0	0	0	0
115	0	376	114	20	309	12	0	19	0	14	0	0	111	74	702	0	0	0
116	0	0	0	0	0	0	0	0	0	0	0	0	0	0	0	0	0	1907
117	0	0	0	0	0	0	736	0	0	0	0	0	0	0	0	568	596	0
118	0	0	0	0	0	0	0	0	0	0	0	0	0	0	0	0	0	1885
119	0	0	664	0	0	6	1161	0	0	0	0	0	0	0	0	0	0	0
120	0	0	0	0	0	0	1824	0	0	0	0	0	0	0	0	0	0	0
121	0	785	0	0	0	819	0	0	0	6	0	0	0	0	0	8	0	0
122	0	0	0	156	0	0	0	0	0	538	689	0	0	0	0	0	0	0
123	0	0	0	0	0	0	0	0	0	0	0	0	0	0	1779	0	0	0
124	0	0	0	0	0	1030	0	0	0	0	0	0	718	0	0	0	0	0
125	0	0	0	0	0	0	0	0	0	0	0	595	0	0	0	0	0	0
126	0	0	0	0	0	0	0	0	0	0	0	973	0	0	0	0	771	0
127	0	0	0	0	31	0	1337	0	0	0	0	0	0	0	23	0	0	0
128	0	0	0	0	0	0	0	0	0	0	0	0	0	0	0	0	0	1711
129	0	0	0	0	13	18	0	0	29	25	23	29	28	1051	19	0	19	23
130	0	0	0	0	0	0	0	0	0	0	0	0	0	0	0	0	0	1665
131	0	0	1664	0	0	0	0	0	0	0	0	0	0	0	0	0	0	0
132	0	0	0	0	0	0	0	0	0	0	1664	0	0	0	0	0	0	0
133	1654	0	0	0	0	0	0	0	0	0	0	0	0	0	0	0	0	0
134	0	0	0	0	0	0	0	0	0	0	1420	0	0	0	0	137	0	79
135	7	0	12	0	0	0	0	0	0	0	0	0	0	0	0	0	412	1221
136	0	0	0	0	0	0	0	0	0	0	1652	0	0	0	0	0	0	0
137	0	0	0	0	0	0	0	0	0	0	0	0	1647	0	0	0	0	0
138	0	0	0	0	0	0	0	0	0	0	0	0	0	0	0	0	0	1635
139	0	0	0	0	0	0	0	0	0	0	0	0	0	0	0	1586	0	0
140	0	0	1260	0	0	0	0	0	0	0	0	0	0	0	0	0	0	0
141	0	410	0	0	0	0	0	0	0	0	0	0	0	8	0	1129	7	0
142	37	0	0	0	0	0	0	0	0	0	0	0	0	0	0	0	0	1508
143	0	0	0	0	0	0	0	0	0	0	0	0	1543	0	0	0	0	0
144	0	0	0	0	0	0	0	0	48	263	0	0	0	164	440	199	0	403
145	0	55	0	0	103	0	0	0	0	0	0	0	0	0	0	71	0	0
146	0	0	0	0	1166	0	0	0	0	374	0	0	0	0	0	0	0	0
147	0	0	0	0	0	0	0	0	1531	0	0	0	0	0	0	0	0	0
148	0	0	0	0	0	0	0	0	0	0	0	0	1531	0	0	0	0	0
149	0	0	0	0	0	0	0	0	1526	0	0	0	0	0	0	0	0	0
150	0	0	0	0	0	0	0	0	0	0	1525	0	0	0	0	0	0	0
151	1519	0	0	0	0	0	0	0	0	0	0	0	0	0	0	0	0	0
152	0	0	1369	0	0	0	0	0	0	0	140	0	0	0	0	0	0	0
153	1508	0	0	0	0	0	0	0	0	0	0	0	0	0	0	0	0	0
154	0	0	0	0	0	418	0	0	0	0	0	0	0	0	862	0	0	0
155	0	0	0	29	0	0	279	0	0	374	0	23	0	0	0	0	0	0
156	0	0	0	0	0	0	0	0	0	0	0	0	1487	0	0	0	0	0
157	0	0	0	0	0	0	0	0	31	0	0	0	32	0	0	1380	0	36
158	0	0	0	0	0	0	0	0	1475	0	0	0	0	0	0	0	0	0
159	1468	0	0	0	0	0	0	0	0	0	0	0	0	0	0	0	0	0
160	0	0	0	0	0	0	0	0	0	0	0	0	0	0	1464	0	0	0
161	0	0	0	0	0	0	0	0	0	0	1463	0	0	0	0	0	0	0
162	0	0	0	0	0	0	0	0	0	0	0	0	1459	0	0	0	0	0
163	0	0	0	0	0	0	1451	0	0	0	0	0	0	0	0	0	0	0
164	0	0	0	0	0	0	0	0	1449	0	0	0	0	0	0	0	0	0
165	0	0	0	0	0	683	0	0	0	0	0	0	0	0	0	0	0	0
166	0	0	0	0	0	0	529	0	0	14	0	0	0	0	904	0	0	0
167	0	0	0	0	0	0	0	0	0	0	0	21	0	0	1426	0	0	0
168	0	571	0	284	0	0	0	0	23	0	0	0	0	0	0	0	0	0
169	0	0	0	0	0	0	0	0	0	0	0	0	0	0	0	1436	0	0
170	0	0	0	0	0	0	1422	0	0	0	0	0	0	0	0	0	0	0
171	0	0	1420	0	0	0	0	0	0	0	0	0	0	0	0	0	0	0
172	0	0	0	0	0	0	0	0	0	0	1418	0	0	0	0	0	0	0
173	0	0	0	0	0	0	0	0	0	0	0	0	1418	0	0	0	0	0
174	0	0	0	0	1410	0	0	0	0	0	0	0	0	0	0	0	0	0
175	1409	0	0	0	0	0	0	0	0	0	0	0	0	0	0	0	0	0
176	0	0	0	0	0	0	0	0	0	0	1405	0	0	0	0	0	0	0
177	0	0	0	0	0	0	0	0	0	0	0	1404	0	0	0	0	0	0
178	0	0	0	0	0	0	0	0	1400	0	0	0	0	0	0	0	0	0
179	0	0	0	0	1396	0	0	0	0	0	0	0	0	0	0	0	0	0
180	0	0	0	86	43	0	0	0	0	40	585	271	320	0	0	0	0	0
181	1391	0	0	0	0	0	0	0	0	0	0	0	0	0	0	0	0	0
182	0	0	0	111	0	0	0	729	48	0	353	89	0	0	0	0	0	0
183	0	0	0	0	0	0	0	0	0	0	0	0	0	0	0	0	504	887
184	0	0	0	0	0	0	0	0	0	0	0	0	0	0	1390	0	0	0
185	0	0	0	0	0	0	0	0	0	0	1388	0	0	0	0	0	0	0
186	0	0	0	0	0	0	0	0	0	0	1387	0	0	0	0	0	0	0
187	744	3	234	0	9	0	0	6	0	389	0	0	0	0	0	0	0	0
188	1383	0	0	0	0	0	0	0	0	0	0	0	0	0	0	0	0	0
189	0	0	0	0	0	0	0	0	0	960	0	0	0	0	418	0	0	0
190	15	0	0	0	0	0	0	0	0	37	0	0	0	0	1323	0	0	0
191	0	0	0	0	0	0	0	0	0	0	1375	0	0	0	0	0	0	0
192	0	634	0	0	737	0	0	0	0	0	0	0	0	0	0	0	0	0
193	0	0	0	0	0	0	0	0	0	0	0	0	0	0	0	0	0	1363
194	0	0	0	0	0	0	0	0	0	0	0	0	0	0	0	0	0	1353
195	179	190	281	220	285	0	0	0	0	0	0	0	0	0	0	0	0	0
196	1352	0	0	0	0	0	0	0	0	0	0	0	0	0	0	0	0	0
197	0	0	0	0	0	0	0	0	0	0	0	0	0	0	1350	0	0	0
198	1348	0	0	0	0	0	0	0	0	0	0	0	0	0	0	0	0	0
199	0	0	0	0	0	0	0	0	0	0	0	0	0	0	1346	0	0	0
200	0	0	0	0	0	0	0	0	0	0	0	0	0	0	1343	0	0	0
201	0	0	0	0	0	0	0	0	0	0	0	1342	0	0	0	0	0	0
202	1335	0	0	0	0	0	0	0	0	0	0	0	0	0	0	0	0	0
203	253	0	0	0	0	265	0	0	0	27	0	0	0	0	443	0	0	0
204	0	0	0	0	0	0	0	0	0	0	0	0	0	0	0	0	0	1321
205	0	0	0	31	0	0	0	0	0	14	0	19	0	7	0	0	0	0
206	182	98	0	226	0	0	0	81	0	17	0	0	0	630	0	0	0	0
207	0	0	0	0	0	0	0	0	0	0	0	0	0	0	0	0	0	1290
208	0	0	0	0	0	0	0	1289	0	0	0	0	0	0	0	0	0	0
209	0	0	0	0	0	0	0	0	1286	0	0	0	0	0	0	0	0	0
210	0	0	0	0	0	0	1283	0	0	0	0	0	0	0	0	0	0	0
211	0	0	0	0	0	0	0	0	0	0	0	0	0	0	1282	0	0	0
212	0	0	1278	0	0	0	0	0	0	0	0	0	0	0	0	0	0	0
213	0	0	0	0	0	0	0	0	0	0	1275	0	0	0	0	0	0	0
214	13	13	8	0	0	0	0	0	31	24	0	23	17	0	1076	10	18	14
215	0	0	0	0	0	0	0	0	1271	0	0	0	0	0	0	0	0	0
217	0	0	0	0	0	0	0	0	0	0	0	0	0	0	1259	0	0	0
218	0	0	0	0	0	0	0	0	1253	0	0	0	0	0	0	0	0	0
219	0	0	0	0	0	822	426	0	0	0	0	0	0	0	0	0	0	0
220	0	0	1247	0	0	0	0	0	0	0	0	0	0	0	0	0	0	0
221	0	0	0	0	0	0	0	0	0	4	0	0	0	1238	0	0	0	0
222	0	0	0	0	0	0	1241	0	0	0	0	0	0	0	0	0	0	0
223	0	0	0	0	0	0	1238	0	0	0	0	0	0	0	0	0	0	0
224	1112	11	0	6	0	0	4	0	8	14	9	8	0	10	9	8	12	0
225	0	0	0	0	0	0	0	0	0	0	0	508	0	0	0	86	36	0
226	0	0	0	0	0	1226	0	0	0	0	0	0	0	0	0	0	0	0
227	0	0	0	0	0	0	0	0	0	0	0	0	0	0	0	0	31	1184
228	0	0	0	0	1214	0	0	0	0	0	0	0	0	0	0	0	0	0
229	0	0	0	0	0	0	0	0	0	0	0	0	0	0	0	1209	0	0
230	0	0	1206	0	0	0	0	0	0	0	0	0	0	0	0	0	0	0
231	0	0	0	0	0	0	0	0	0	0	0	1206	0	0	0	0	0	0
232	0	0	1201	0	0	0	0	0	0	0	0	0	0	0	0	0	0	0
233	0	0	0	0	0	0	1196	0	0	0	0	0	0	0	0	0	0	0
234	0	0	0	0	0	0	0	0	0	0	0	0	0	1195	0	0	0	0
235	0	0	0	0	0	0	0	0	0	0	0	1191	0	0	0	0	0	0
236	0	0	0	0	0	0	0	0	0	0	0	0	0	0	0	1008	0	0
237	0	0	0	0	0	1186	0	0	0	0	0	0	0	0	0	0	0	0
238	709	0	0	0	0	0	0	0	0	0	18	0	0	0	14	0	0	42
239	0	1184	0	0	0	0	0	0	0	0	0	0	0	0	0	0	0	0
240	0	0	0	0	0	0	0	0	0	0	0	0	1183	0	0	0	0	0
241	0	0	0	0	0	0	0	0	0	0	0	0	0	0	0	0	0	1182
242	0	0	1115	0	0	0	0	0	23	19	24	0	0	0	0	0	0	0
243	0	0	0	0	0	0	0	0	0	0	0	0	0	0	0	0	0	1173
244	0	0	0	0	1170	0	0	0	0	0	0	0	0	0	0	0	0	0
245	0	0	0	0	0	0	0	0	0	0	0	1165	0	0	0	0	0	0
246	0	0	1159	0	0	0	0	0	0	0	0	0	0	0	0	0	0	0
247	0	0	0	0	0	0	0	0	1156	0	0	0	0	0	0	0	0	0
248	0	0	0	0	0	0	0	0	1153	0	0	0	0	0	0	0	0	0
249	0	0	0	0	0	0	0	0	0	0	0	0	0	1153	0	0	0	0
251	310	0	383	0	0	0	0	36	0	128	0	0	8	39	0	0	88	0
252	0	0	0	0	0	0	0	0	1146	0	0	0	0	0	0	0	0	0
253	0	0	0	0	0	0	0	0	0	0	0	0	0	1146	0	0	0	0
254	0	0	0	0	0	0	0	0	0	0	0	0	0	0	0	0	0	1142
255	0	0	0	0	1140	0	0	0	0	0	0	0	0	0	0	0	0	0
256	0	0	0	0	0	1139	0	0	0	0	0	0	0	0	0	0	0	0
257	0	0	0	0	0	0	0	0	0	0	0	0	0	1132	0	0	0	0
258	0	0	0	0	0	0	67	0	0	64	821	0	83	0	0	0	0	0
259	0	0	0	0	0	0	0	1129	0	0	0	0	0	0	0	0	0	0
260	0	0	0	0	0	0	0	0	0	0	0	0	0	0	0	0	0	1125
261	1114	0	0	0	0	0	0	0	0	0	0	0	0	0	0	0	0	0
262	0	0	0	0	0	0	0	1112	0	0	0	0	0	0	0	0	0	0
263	0	0	0	0	0	0	0	0	0	0	0	0	1111	0	0	0	0	0
264	0	0	0	0	0	0	0	0	0	0	0	0	0	0	1106	0	0	0
265	0	0	0	0	0	0	0	0	0	0	0	0	0	0	0	0	0	1102
266	0	0	0	0	0	0	0	1098	0	0	0	0	0	0	0	0	0	0
267	0	0	0	0	0	1094	0	0	0	0	0	0	0	0	0	0	0	0
268	0	21	0	0	0	0	141	237	0	70	445	0	0	0	8	0	0	0
269	0	0	0	0	0	179	0	0	0	0	0	0	0	0	0	910	0	0
270	0	0	0	0	0	0	1089	0	0	0	0	0	0	0	0	0	0	0
271	0	0	0	0	0	0	0	0	0	0	0	1087	0	0	0	0	0	0
272	101	0	115	0	0	0	24	0	0	121	0	0	0	0	0	0	0	87
273	0	0	0	0	0	0	0	0	0	0	0	1080	0	0	0	0	0	0
274	0	0	0	0	0	0	0	0	1079	0	0	0	0	0	0	0	0	0
276	0	0	0	0	0	0	1074	0	0	0	0	0	0	0	0	0	0	0
277	0	0	0	0	0	0	0	1071	0	0	0	0	0	0	0	0	0	0
278	0	0	0	0	0	0	0	0	0	0	0	0	1070	0	0	0	0	0
279	0	0	0	0	0	0	0	1069	0	0	0	0	0	0	0	0	0	0
280	0	0	0	0	0	0	0	0	0	0	0	0	1066	0	0	0	0	0
281	1065	0	0	0	0	0	0	0	0	0	0	0	0	0	0	0	0	0
282	0	0	0	0	0	0	0	1065	0	0	0	0	0	0	0	0	0	0
283	0	0	54	142	73	0	0	0	124	51	0	0	0	310	87	0	0	0
284	0	0	0	0	0	0	0	0	0	0	0	0	1051	0	0	0	0	0
285	1048	0	0	0	0	0	0	0	0	0	0	0	0	0	0	0	0	0
286	0	0	0	0	0	0	0	0	0	0	0	0	0	0	1045	0	0	0
287	0	0	1044	0	0	0	0	0	0	0	0	0	0	0	0	0	0	0
288	0	0	1043	0	0	0	0	0	0	0	0	0	0	0	0	0	0	0
289	0	0	0	0	0	0	0	1043	0	0	0	0	0	0	0	0	0	0
290	0	0	0	0	0	0	0	0	0	0	0	0	0	0	0	1041	0	0
291	0	0	0	0	0	0	0	854	0	0	0	114	0	0	0	0	0	69
292	0	0	0	0	0	0	0	0	0	0	0	0	0	0	0	0	1037	0
293	0	0	1031	0	0	0	0	0	0	0	0	0	0	0	0	0	0	0
294	0	0	0	0	0	0	0	0	0	0	0	0	0	0	1031	0	0	0
295	0	0	0	0	0	1028	0	0	0	0	0	0	0	0	0	0	0	0
296	0	0	0	0	0	155	0	0	0	0	462	0	0	7	0	0	342	0
297	0	0	0	0	0	0	0	1019	0	0	0	0	0	0	0	0	0	0
298	0	0	0	333	0	0	0	0	0	0	0	685	0	0	0	0	0	0
300	0	0	0	0	0	0	0	0	0	0	0	0	0	0	0	0	598	0
301	0	0	0	25	147	172	0	60	0	59	0	32	185	109	0	0	60	44
302	0	0	0	0	0	0	0	0	1016	0	0	0	0	0	0	0	0	0
303	0	0	0	0	0	0	0	0	1006	0	0	0	0	0	0	0	0	0
304	0	0	0	0	0	0	0	0	0	0	0	0	0	1006	0	0	0	0
305	0	0	0	0	0	0	0	0	0	0	0	0	0	0	0	0	0	1005
306	0	0	0	0	0	0	0	0	0	0	0	0	0	0	0	0	0	1004
307	0	0	0	0	0	0	0	1003	0	0	0	0	0	0	0	0	0	0
308	0	0	0	0	0	0	0	0	0	0	0	0	993	0	0	0	0	0
309	0	0	0	0	0	0	0	0	0	0	992	0	0	0	0	0	0	0
310	0	0	0	0	0	0	0	0	0	0	0	0	986	0	0	0	0	0
311	0	0	0	0	0	0	0	0	0	0	0	0	0	0	986	0	0	0
312	0	607	0	0	0	0	0	3	10	7	0	0	0	0	0	0	0	0
313	0	0	0	0	982	0	0	0	0	0	0	0	0	0	0	0	0	0
314	981	0	0	0	0	0	0	0	0	0	0	0	0	0	0	0	0	0
315	0	0	0	0	0	0	0	0	0	0	0	0	0	0	980	0	0	0
316	0	0	0	0	974	0	0	0	0	0	0	0	0	0	0	0	0	0
317	0	0	0	0	0	0	0	0	94	0	485	0	0	0	0	27	345	0
318	0	0	0	0	0	0	0	968	0	0	0	0	0	0	0	0	0	0
319	0	0	0	0	0	0	0	0	961	0	0	0	0	0	0	0	0	0
320	0	0	0	0	0	0	0	0	0	0	0	960	0	0	0	0	0	0
321	0	957	0	0	0	0	0	0	0	0	0	0	0	0	0	0	0	0
322	0	0	533	0	0	0	0	0	0	0	224	0	0	0	88	112	0	0
323	0	0	955	0	0	0	0	0	0	0	0	0	0	0	0	0	0	0
324	0	0	0	0	0	0	0	0	0	0	0	0	0	0	954	0	0	0
325	0	0	0	0	0	0	0	952	0	0	0	0	0	0	0	0	0	0
326	0	0	0	0	0	0	0	944	0	0	0	0	0	0	0	0	0	0
327	0	0	0	0	0	0	943	0	0	0	0	0	0	0	0	0	0	0
328	0	0	0	0	0	0	0	0	0	0	53	889	0	0	0	0	0	0
329	0	0	0	0	0	0	0	0	0	0	0	0	0	0	938	0	0	0
331	0	9	0	0	0	0	0	0	0	104	187	0	0	594	0	0	0	0
333	0	0	0	0	0	0	0	0	0	0	0	0	0	0	0	0	0	922
334	0	0	0	0	0	916	0	0	0	0	0	0	0	0	0	0	0	0
335	5	0	110	0	174	17	0	0	470	0	34	65	0	0	17	0	0	0
336	0	0	50	0	28	0	143	0	24	0	0	0	0	0	0	0	482	0
337	0	0	0	52	0	0	19	0	0	40	0	133	0	15	0	0	9	0
338	0	0	0	0	0	0	0	0	0	0	0	0	899	0	0	0	0	0
339	0	0	0	0	0	0	0	0	0	0	0	0	0	0	0	0	897	0
340	0	0	895	0	0	0	0	0	0	0	0	0	0	0	0	0	0	0
341	0	0	0	0	0	0	0	0	0	0	0	0	0	0	895	0	0	0
342	0	0	0	0	0	0	0	0	0	0	0	0	0	0	0	0	894	0
343	0	0	0	0	0	0	0	0	0	0	0	0	0	0	888	0	0	0
344	0	0	0	0	0	0	0	0	0	0	0	0	0	0	884	0	0	0
346	0	0	883	0	0	0	0	0	0	0	0	0	0	0	0	0	0	0
347	0	0	0	0	0	0	0	0	0	0	881	0	0	0	0	0	0	0
348	0	0	0	0	0	0	0	0	0	0	0	0	881	0	0	0	0	0
349	0	0	0	0	0	0	0	0	0	0	0	0	0	0	0	881	0	0
350	0	0	0	0	0	0	0	0	0	0	0	0	875	0	0	0	0	0
351	0	0	0	0	0	0	874	0	0	0	0	0	0	0	0	0	0	0
352	0	0	0	0	0	0	0	0	0	0	0	871	0	0	0	0	0	0
354	0	0	0	0	0	0	0	0	0	0	0	0	0	0	0	0	0	869
355	0	0	0	0	0	0	0	867	0	0	0	0	0	0	0	0	0	0
356	0	0	0	0	0	0	0	0	710	0	0	0	0	0	155	0	0	0
357	0	121	0	0	0	0	143	28	0	54	0	122	0	177	0	0	0	0
358	28	32	17	29	29	42	35	37	39	57	28	44	59	80	60	30	48	55
359	0	0	0	0	0	0	0	0	0	0	0	0	0	0	0	859	0	0
360	28	0	0	0	0	0	0	0	0	0	0	0	26	0	711	75	0	12
361	0	0	0	0	0	0	0	0	0	0	0	0	0	0	851	0	0	0
362	0	0	0	0	0	0	0	0	0	0	0	0	0	0	0	0	848	0
363	0	0	0	198	0	0	0	0	0	0	0	641	0	0	0	0	0	0
364	617	0	0	0	0	0	0	0	0	0	0	0	0	218	0	0	0	0
365	0	0	0	0	0	0	0	0	0	0	829	0	0	0	0	0	0	0
366	0	0	0	0	0	828	0	0	0	0	0	0	0	0	0	0	0	0
367	0	0	0	0	0	0	0	0	0	0	825	0	0	0	0	0	0	0
368	0	0	0	0	0	0	0	0	0	0	0	818	0	0	0	0	0	0
369	0	0	0	0	0	0	0	0	0	0	0	0	0	817	0	0	0	0
370	0	0	0	0	0	0	0	806	0	0	0	0	0	0	0	0	0	0
371	0	0	805	0	0	0	0	0	0	0	0	0	0	0	0	0	0	0
372	0	0	0	0	0	0	0	0	0	0	0	804	0	0	0	0	0	0
373	802	0	0	0	0	0	0	0	0	0	0	0	0	0	0	0	0	0
374	0	0	0	0	0	0	0	0	0	0	0	0	0	0	0	0	793	0
375	0	0	0	0	0	0	0	0	0	0	0	0	0	0	0	0	0	785
376	189	122	0	6	0	0	0	0	0	7	151	0	0	0	20	0	0	0
378	0	783	0	0	0	0	0	0	0	0	0	0	0	0	0	0	0	0
379	0	0	0	0	0	0	0	0	0	0	0	0	0	777	0	0	0	0
380	193	0	197	0	0	0	0	318	0	0	0	0	0	0	0	67	0	0
381	0	774	0	0	0	0	0	0	0	0	0	0	0	0	0	0	0	0
382	0	0	0	0	0	773	0	0	0	0	0	0	0	0	0	0	0	0
383	0	0	0	0	0	772	0	0	0	0	0	0	0	0	0	0	0	0
384	0	0	0	0	0	0	0	771	0	0	0	0	0	0	0	0	0	0
385	0	189	0	413	67	0	0	0	0	43	0	0	0	0	0	0	0	0
386	0	0	0	0	0	770	0	0	0	0	0	0	0	0	0	0	0	0
387	0	0	0	0	0	0	0	0	0	0	0	0	0	0	770	0	0	0
389	0	0	0	0	0	0	0	0	0	0	0	0	0	0	768	0	0	0
390	0	0	0	0	0	0	0	0	0	0	0	0	0	0	0	0	765	0
391	0	0	0	0	0	0	0	0	0	0	0	0	0	0	0	0	764	0
392	0	0	0	0	0	761	0	0	0	0	0	0	0	0	0	0	0	0
393	0	0	0	0	0	0	0	0	0	0	0	0	0	0	0	0	0	761
395	0	0	0	0	0	754	0	0	0	0	0	0	0	0	0	0	0	0
397	0	0	0	0	0	0	0	742	0	0	0	0	0	0	0	0	0	0
398	0	0	0	0	0	0	0	739	0	0	0	0	0	0	0	0	0	0
399	738	0	0	0	0	0	0	0	0	0	0	0	0	0	0	0	0	0
400	0	0	737	0	0	0	0	0	0	0	0	0	0	0	0	0	0	0
401	0	0	0	0	0	0	0	0	736	0	0	0	0	0	0	0	0	0
402	733	0	0	0	0	0	0	0	0	0	0	0	0	0	0	0	0	0
403	0	728	0	0	0	0	0	0	0	0	0	0	0	0	0	0	0	0
404	0	0	0	0	0	0	0	0	0	0	0	0	0	0	0	0	727	0
405	0	0	0	0	0	0	0	0	0	0	0	724	0	0	0	0	0	0
406	0	0	0	277	0	0	0	0	11	0	0	11	0	163	0	0	0	0
407	0	0	0	0	0	0	0	0	0	0	0	0	0	0	0	0	0	721
408	0	0	0	0	0	0	0	0	0	0	0	109	0	44	1	0	0	435
409	0	0	719	0	0	0	0	0	0	0	0	0	0	0	0	0	0	0
410	0	711	0	0	0	0	0	0	0	0	0	0	0	0	0	0	0	0
411	0	0	0	0	0	710	0	0	0	0	0	0	0	0	0	0	0	0
412	0	0	0	0	0	0	139	0	0	0	0	0	407	0	0	0	0	0
413	0	0	0	0	0	0	0	701	0	0	0	0	0	0	0	0	0	0
414	25	0	0	36	0	0	0	0	0	147	0	0	0	480	0	0	0	0
415	0	697	0	0	0	0	0	0	0	0	0	0	0	0	0	0	0	0
417	0	0	0	0	696	0	0	0	0	0	0	0	0	0	0	0	0	0
418	0	0	0	0	0	0	0	694	0	0	0	0	0	0	0	0	0	0
419	0	0	0	0	0	0	0	0	0	0	0	0	0	0	694	0	0	0
420	0	693	0	0	0	0	0	0	0	0	0	0	0	0	0	0	0	0
421	0	0	0	0	0	0	0	0	693	0	0	0	0	0	0	0	0	0
422	0	691	0	0	0	0	0	0	0	0	0	0	0	0	0	0	0	0
423	0	0	0	0	0	0	0	0	0	0	0	691	0	0	0	0	0	0
425	536	0	0	10	0	0	0	0	0	0	0	0	0	0	0	0	0	0
426	0	0	0	0	0	0	0	0	0	0	0	0	0	684	0	0	0	0
427	0	0	0	0	683	0	0	0	0	0	0	0	0	0	0	0	0	0
428	0	0	0	0	0	681	0	0	0	0	0	0	0	0	0	0	0	0
429	0	678	0	0	0	0	0	0	0	0	0	0	0	0	0	0	0	0
430	0	0	0	0	0	0	678	0	0	0	0	0	0	0	0	0	0	0
432	0	0	0	0	675	0	0	0	0	0	0	0	0	0	0	0	0	0
433	0	0	0	0	0	672	0	0	0	0	0	0	0	0	0	0	0	0
434	0	668	0	0	0	0	0	0	0	0	0	0	0	0	0	0	0	0
435	0	0	0	0	0	0	0	0	9	12	0	0	0	0	0	0	611	0
436	0	0	0	0	0	0	0	0	0	0	0	0	0	0	0	666	0	0
437	114	16	0	60	0	0	0	0	0	0	0	22	0	0	0	0	0	0
438	0	0	0	0	0	0	0	0	0	0	0	0	665	0	0	0	0	0
439	0	664	0	0	0	0	0	0	0	0	0	0	0	0	0	0	0	0
440	0	660	0	0	0	0	0	0	0	0	0	0	0	0	0	0	0	0
441	0	0	0	0	0	0	0	0	0	0	0	0	216	0	0	442	0	0
442	0	0	0	0	0	0	0	650	6	0	0	0	0	0	0	0	0	0
443	0	0	0	0	0	0	0	0	0	0	653	0	0	0	0	0	0	0
444	0	0	0	0	0	0	0	0	0	0	0	0	0	0	0	0	650	0
445	0	0	0	0	0	0	0	0	0	0	0	0	0	0	647	0	0	0
446	0	643	0	0	0	0	0	0	0	0	0	0	0	0	0	0	0	0
447	0	0	0	0	0	0	0	0	0	0	0	642	0	0	0	0	0	0
448	0	641	0	0	0	0	0	0	0	0	0	0	0	0	0	0	0	0
449	0	0	0	0	0	0	0	0	0	638	0	0	0	0	0	0	0	0
450	0	632	0	0	0	0	0	0	0	0	0	0	0	0	0	0	0	0
451	141	0	273	0	0	0	217	0	0	0	0	0	0	0	0	0	0	0
452	0	0	75	0	190	0	52	0	0	0	0	0	0	0	0	20	0	0
453	0	0	0	0	0	0	0	0	0	630	0	0	0	0	0	0	0	0
454	0	0	0	0	0	0	628	0	0	0	0	0	0	0	0	0	0	0
455	0	625	0	0	0	0	0	0	0	0	0	0	0	0	0	0	0	0
456	0	0	0	0	623	0	0	0	0	0	0	0	0	0	0	0	0	0
457	0	0	0	0	0	0	0	0	0	622	0	0	0	0	0	0	0	0
458	0	0	0	0	0	0	0	0	0	0	0	0	0	0	0	0	622	0
459	0	0	0	17	0	0	0	0	0	50	0	0	0	0	488	0	0	0
460	0	0	0	0	0	0	225	0	0	278	58	53	0	0	0	0	0	0
461	0	612	0	0	0	0	0	0	0	0	0	0	0	0	0	0	0	0
462	0	0	0	0	0	0	0	0	0	0	0	610	0	0	0	0	0	0
463	0	0	0	0	0	0	0	0	600	0	0	0	0	0	0	0	0	0
464	40	557	0	0	0	0	0	0	0	0	0	0	0	0	0	0	0	0
465	0	596	0	0	0	0	0	0	0	0	0	0	0	0	0	0	0	0
466	0	596	0	0	0	0	0	0	0	0	0	0	0	0	0	0	0	0
468	72	152	0	73	0	0	0	0	0	91	0	0	0	22	0	0	0	0
469	0	0	587	0	0	0	0	0	0	0	0	0	0	0	0	0	0	0
470	0	0	0	0	0	0	587	0	0	0	0	0	0	0	0	0	0	0
471	0	0	0	56	0	0	0	0	0	269	247	0	0	0	0	0	0	0
472	0	0	13	0	8	0	14	0	0	0	15	0	16	0	0	0	514	0
473	0	578	0	0	0	0	0	0	0	0	0	0	0	0	0	0	0	0
474	0	0	0	0	0	0	0	0	0	0	0	0	578	0	0	0	0	0
475	0	574	0	0	0	0	0	0	0	0	0	0	0	0	0	0	0	0
477	0	0	0	0	0	0	0	0	0	570	0	0	0	0	0	0	0	0
478	0	49	0	212	0	0	0	0	0	0	0	0	0	0	0	0	0	0
479	0	0	0	0	0	0	0	0	0	557	0	0	0	0	0	0	0	0
480	0	0	0	0	0	12	0	0	0	0	0	0	35	0	0	295	209	0
481	550	0	0	0	0	0	0	0	0	0	0	0	0	0	0	0	0	0
482	0	0	550	0	0	0	0	0	0	0	0	0	0	0	0	0	0	0
483	0	0	0	226	0	0	0	0	0	0	0	0	0	0	0	0	0	0
484	0	0	0	0	0	548	0	0	0	0	0	0	0	0	0	0	0	0
485	0	0	0	0	0	0	0	0	0	548	0	0	0	0	0	0	0	0
486	0	67	0	158	38	0	101	0	0	118	0	42	0	0	0	0	0	0
487	545	0	0	0	0	0	0	0	0	0	0	0	0	0	0	0	0	0
488	545	0	0	0	0	0	0	0	0	0	0	0	0	0	0	0	0	0
489	0	0	341	178	0	0	0	0	0	0	26	0	0	0	0	0	0	0
490	0	0	0	0	0	0	0	0	545	0	0	0	0	0	0	0	0	0
491	12	0	478	0	0	0	0	34	0	0	0	0	0	0	0	0	0	0
492	0	0	0	0	0	542	0	0	0	0	0	0	0	0	0	0	0	0
494	0	0	0	0	0	0	0	0	540	0	0	0	0	0	0	0	0	0
495	0	0	92	137	5	0	0	5	0	0	0	0	0	47	0	0	0	0
496	0	0	0	0	0	0	0	0	0	0	0	0	0	0	538	0	0	0
497	0	255	0	155	24	0	0	101	0	0	0	0	0	0	0	0	0	0
498	0	533	0	0	0	0	0	0	0	0	0	0	0	0	0	0	0	0
500	0	0	0	0	0	0	0	0	0	532	0	0	0	0	0	0	0	0
501	0	0	0	0	0	0	0	0	0	0	0	0	0	0	0	0	524	8
502	0	0	0	0	0	0	0	0	0	531	0	0	0	0	0	0	0	0
503	0	0	0	0	0	0	0	0	0	0	0	0	0	528	0	0	0	0
504	0	0	0	0	0	0	0	526	0	0	0	0	0	0	0	0	0	0
505	0	524	0	0	0	0	0	0	0	0	0	0	0	0	0	0	0	0
506	0	0	0	0	0	0	0	0	0	524	0	0	0	0	0	0	0	0
507	0	0	0	0	0	0	0	0	0	0	0	0	0	0	0	0	519	0
508	0	515	0	0	0	0	0	0	0	0	0	0	0	0	0	0	0	0
509	0	514	0	0	0	0	0	0	0	0	0	0	0	0	0	0	0	0
510	0	0	0	0	0	513	0	0	0	0	0	0	0	0	0	0	0	0
511	0	0	0	0	0	0	0	0	0	513	0	0	0	0	0	0	0	0
512	0	512	0	0	0	0	0	0	0	0	0	0	0	0	0	0	0	0
513	250	0	117	0	0	0	0	0	0	0	0	0	0	0	0	27	0	0
515	0	507	0	0	0	0	0	0	0	0	0	0	0	0	0	0	0	0
516	9	0	0	54	0	0	248	40	0	21	0	0	0	135	0	0	0	0
518	0	0	0	0	0	0	0	0	0	0	505	0	0	0	0	0	0	0
519	0	0	0	0	0	0	0	0	0	0	0	505	0	0	0	0	0	0
520	0	0	0	0	0	0	0	0	0	0	503	0	0	0	0	0	0	0
521	0	502	0	0	0	0	0	0	0	0	0	0	0	0	0	0	0	0
522	0	0	0	0	0	0	0	0	0	502	0	0	0	0	0	0	0	0
524	0	0	0	0	0	500	0	0	0	0	0	0	0	0	0	0	0	0
525	0	0	0	0	0	0	0	0	0	0	0	0	0	500	0	0	0	0
526	0	0	0	0	0	0	0	0	0	0	0	0	0	0	0	0	0	498
527	0	0	0	0	0	0	0	497	0	0	0	0	0	0	0	0	0	0
528	0	0	0	54	0	0	0	0	0	161	0	0	0	94	0	0	0	0
529	0	0	0	0	0	0	0	0	0	0	0	0	490	0	0	0	0	0
530	0	0	0	489	0	0	0	0	0	0	0	0	0	0	0	0	0	0
531	0	0	0	0	0	0	0	0	488	0	0	0	0	0	0	0	0	0
532	0	486	0	0	0	0	0	0	0	0	0	0	0	0	0	0	0	0
533	0	485	0	0	0	0	0	0	0	0	0	0	0	0	0	0	0	0
534	485	0	0	0	0	0	0	0	0	0	0	0	0	0	0	0	0	0
535	168	0	0	0	0	0	0	0	0	0	0	90	0	0	0	0	0	0
536	0	484	0	0	0	0	0	0	0	0	0	0	0	0	0	0	0	0
537	16	0	388	0	0	0	0	0	0	0	0	0	0	0	0	0	0	0
538	0	0	0	0	0	0	0	0	482	0	0	0	0	0	0	0	0	0
539	0	478	0	0	0	0	0	0	0	0	0	0	0	0	0	0	0	0
540	473	0	0	0	0	0	5	0	0	0	0	0	0	0	0	0	0	0
541	298	0	0	0	0	137	0	0	0	42	0	0	0	0	0	0	0	0
542	0	0	0	0	0	0	0	0	0	0	0	477	0	0	0	0	0	0
543	0	476	0	0	0	0	0	0	0	0	0	0	0	0	0	0	0	0
544	0	476	0	0	0	0	0	0	0	0	0	0	0	0	0	0	0	0
545	0	476	0	0	0	0	0	0	0	0	0	0	0	0	0	0	0	0
546	0	0	0	0	0	0	0	0	0	0	0	0	0	476	0	0	0	0
547	0	0	475	0	0	0	0	0	0	0	0	0	0	0	0	0	0	0
548	0	0	0	0	0	102	0	0	0	0	0	0	0	0	0	0	0	0
549	0	70	0	19	0	0	0	0	0	81	137	0	0	47	0	0	0	0
550	0	0	0	0	0	0	473	0	0	0	0	0	0	0	0	0	0	0
551	0	0	467	0	0	0	0	0	0	0	0	0	0	0	0	0	0	0
553	0	0	0	0	0	0	0	0	0	0	0	0	0	0	464	0	0	0
554	0	0	0	0	0	0	0	0	0	0	0	0	0	0	0	0	404	60
555	0	463	0	0	0	0	0	0	0	0	0	0	0	0	0	0	0	0
556	0	0	0	0	0	0	0	463	0	0	0	0	0	0	0	0	0	0
558	0	0	0	0	0	0	0	0	0	0	0	0	0	0	0	0	463	0
559	458	0	0	0	0	0	0	0	0	0	0	0	0	0	0	0	0	0
560	0	457	0	0	0	0	0	0	0	0	0	0	0	0	0	0	0	0
561	0	0	0	0	0	0	0	0	0	0	0	457	0	0	0	0	0	0
562	0	0	0	0	0	0	0	0	0	0	453	0	0	0	0	0	0	0
563	0	0	0	16	431	0	0	0	0	0	0	0	0	0	0	0	0	0
564	0	0	0	0	0	0	0	0	301	0	0	0	0	0	0	148	0	0
565	0	0	0	22	0	0	0	0	0	0	0	0	0	0	0	376	19	28
566	444	0	0	0	0	0	0	0	0	0	0	0	0	0	0	0	0	0
567	0	0	0	0	0	444	0	0	0	0	0	0	0	0	0	0	0	0
568	0	0	0	440	0	0	0	0	0	0	0	0	0	0	0	0	0	0
569	0	0	0	0	0	0	72	0	0	0	0	0	0	0	269	0	0	0
571	0	0	0	0	0	0	0	0	0	437	0	0	0	0	0	0	0	0
572	0	0	0	0	433	0	0	0	0	0	0	0	0	0	0	0	2	0
573	0	430	0	0	0	0	0	0	0	0	0	0	0	0	0	0	0	0
574	0	0	0	0	0	0	107	296	0	0	0	0	0	0	27	0	0	0
575	0	428	0	0	0	0	0	0	0	0	0	0	0	0	0	0	0	0
576	0	0	0	122	242	0	0	0	0	0	0	4	0	9	0	0	0	0
578	0	47	88	18	0	0	0	0	0	0	0	0	99	0	0	0	9	0
580	0	0	0	0	0	0	0	0	0	0	0	420	0	0	0	0	0	0
581	0	0	0	0	0	0	57	0	0	0	0	0	0	361	0	0	0	0
582	417	0	0	0	0	0	0	0	0	0	0	0	0	0	0	0	0	0
583	0	0	0	417	0	0	0	0	0	0	0	0	0	0	0	0	0	0
584	0	0	0	0	0	0	0	0	0	0	0	0	0	0	0	0	0	417
585	0	416	0	0	0	0	0	0	0	0	0	0	0	0	0	0	0	0
586	0	0	0	0	0	415	0	0	0	0	0	0	0	0	0	0	0	0
588	0	412	0	0	0	0	0	0	0	0	0	0	0	0	0	0	0	0
589	16	0	0	49	23	0	90	128	0	0	0	0	0	0	0	0	0	0
591	0	0	0	0	0	0	0	0	0	0	0	0	0	0	0	0	0	407
592	0	0	0	0	0	0	0	0	0	0	0	0	0	0	0	0	404	0
593	0	0	0	400	0	0	0	0	0	0	0	0	0	0	0	0	0	0
594	0	0	0	0	0	399	0	0	0	0	0	0	0	0	0	0	0	0
596	0	0	0	0	0	0	0	0	0	0	0	0	0	0	0	0	0	398
597	0	0	0	397	0	0	0	0	0	0	0	0	0	0	0	0	0	0
598	0	0	0	0	0	0	0	0	0	0	109	0	78	95	0	0	0	0
599	0	0	0	0	0	0	0	0	0	0	396	0	0	0	0	0	0	0
600	0	0	0	0	0	0	0	0	0	0	0	0	0	0	0	0	0	395
601	0	0	0	0	0	0	0	0	0	0	0	0	394	0	0	0	0	0
602	0	0	0	0	0	0	0	0	0	0	0	0	0	0	0	393	0	0
603	0	0	0	0	0	0	0	0	0	0	0	0	0	0	0	0	0	393
604	0	0	0	0	389	0	0	0	0	0	0	0	0	0	0	0	0	0
605	0	0	0	0	0	0	0	0	0	0	0	0	0	388	0	0	0	0
606	0	0	0	0	386	0	0	0	0	0	0	0	0	0	0	0	0	0
607	0	384	0	0	0	0	0	0	0	0	0	0	0	0	0	0	0	0
608	0	0	0	0	0	0	0	0	0	0	0	0	0	0	0	0	384	0
609	0	379	0	0	0	0	0	0	0	0	0	0	0	0	0	0	0	0
610	0	0	0	0	0	0	0	0	0	0	0	0	378	0	0	0	0	0
611	0	0	0	377	0	0	0	0	0	0	0	0	0	0	0	0	0	0
612	0	0	0	0	0	0	0	0	0	0	0	0	0	0	375	0	0	0
613	0	0	0	5	0	0	0	0	0	0	0	0	0	0	0	0	0	0
614	0	0	0	0	0	373	0	0	0	0	0	0	0	0	0	0	0	0
616	0	0	0	0	0	0	0	0	0	0	0	0	0	0	0	0	0	373
617	0	363	0	0	0	0	0	0	0	0	0	0	0	0	0	0	0	9
618	0	0	0	0	0	0	0	0	0	0	0	0	371	0	0	0	0	0
619	0	0	0	0	0	0	0	0	0	0	0	0	0	0	369	0	0	0
620	0	0	0	0	0	0	0	0	0	0	0	0	0	367	0	0	0	0
621	0	0	0	0	0	0	0	0	0	0	0	0	0	366	0	0	0	0
622	0	0	0	0	0	0	0	0	0	0	0	0	0	0	0	365	0	0
623	0	0	0	0	363	0	0	0	0	0	0	0	0	0	0	0	0	0
624	0	0	360	0	0	0	0	0	0	0	0	0	0	0	0	0	0	0
625	0	0	0	0	0	0	0	0	0	0	0	0	0	360	0	0	0	0
626	0	0	0	358	0	0	0	0	0	0	0	0	0	0	0	0	0	0
627	0	0	0	358	0	0	0	0	0	0	0	0	0	0	0	0	0	0
628	0	0	0	0	0	0	0	0	0	355	0	0	0	0	0	0	0	0
629	0	0	0	354	0	0	0	0	0	0	0	0	0	0	0	0	0	0
630	0	0	0	0	0	0	0	0	0	0	0	0	0	354	0	0	0	0
631	0	0	0	0	353	0	0	0	0	0	0	0	0	0	0	0	0	0
632	0	0	0	0	0	0	0	0	0	0	0	0	0	0	0	0	353	0
633	0	0	352	0	0	0	0	0	0	0	0	0	0	0	0	0	0	0
634	0	0	0	0	0	0	11	0	0	0	0	0	0	0	0	340	0	0
635	0	0	348	0	0	0	0	0	0	0	0	0	0	0	0	0	0	0
636	0	344	0	0	0	0	0	0	0	0	0	0	0	0	0	0	0	0
637	0	341	0	0	0	0	0	0	0	0	0	0	0	0	0	0	0	0
638	341	0	0	0	0	0	0	0	0	0	0	0	0	0	0	0	0	0
639	0	0	0	0	0	0	0	0	0	0	0	0	0	0	0	338	0	0
640	0	0	0	0	0	0	0	0	0	89	0	0	0	0	0	0	0	0
642	0	332	0	0	0	0	0	0	0	0	0	0	0	0	0	0	0	0
643	0	0	0	0	0	330	0	0	0	0	0	0	0	0	0	0	0	0
644	0	0	0	329	0	0	0	0	0	0	0	0	0	0	0	0	0	0
645	0	0	0	0	0	329	0	0	0	0	0	0	0	0	0	0	0	0
646	0	0	0	0	0	0	0	0	0	0	0	0	329	0	0	0	0	0
647	0	0	0	0	0	328	0	0	0	0	0	0	0	0	0	0	0	0
648	0	0	0	0	0	0	0	0	0	0	0	0	0	0	0	0	0	326
649	0	0	0	0	0	0	325	0	0	0	0	0	0	0	0	0	0	0
650	0	0	0	0	0	0	0	0	0	325	0	0	0	0	0	0	0	0
651	0	0	0	0	0	0	0	0	0	0	0	0	0	0	0	0	0	325
652	0	0	0	324	0	0	0	0	0	0	0	0	0	0	0	0	0	0
653	0	0	0	0	0	0	0	0	0	0	0	321	0	0	0	0	0	0
655	0	0	0	319	0	0	0	0	0	0	0	0	0	0	0	0	0	0
656	0	318	0	0	0	0	0	0	0	0	0	0	0	0	0	0	0	0
657	0	0	0	0	0	0	0	0	0	0	0	0	0	0	0	0	318	0
658	0	0	0	0	317	0	0	0	0	0	0	0	0	0	0	0	0	0
659	0	313	0	0	0	0	0	0	0	0	0	0	0	0	0	0	0	0
660	0	313	0	0	0	0	0	0	0	0	0	0	0	0	0	0	0	0
661	64	0	0	31	0	0	0	0	0	0	0	0	0	0	0	0	0	0
662	0	0	0	311	0	0	0	0	0	0	0	0	0	0	0	0	0	0
663	0	0	0	0	0	0	0	0	0	311	0	0	0	0	0	0	0	0
664	0	0	0	0	0	0	0	0	0	0	0	0	0	0	0	311	0	0
665	0	0	0	0	310	0	0	0	0	0	0	0	0	0	0	0	0	0
666	0	0	0	0	0	310	0	0	0	0	0	0	0	0	0	0	0	0
667	309	0	0	0	0	0	0	0	0	0	0	0	0	0	0	0	0	0
669	0	0	0	66	0	0	0	0	0	0	0	0	0	0	0	0	0	0
670	0	0	0	0	308	0	0	0	0	0	0	0	0	0	0	0	0	0
671	0	0	0	0	0	0	0	0	0	0	308	0	0	0	0	0	0	0
672	0	0	0	306	0	0	0	0	0	0	0	0	0	0	0	0	0	0
673	0	0	0	306	0	0	0	0	0	0	0	0	0	0	0	0	0	0
675	0	0	0	305	0	0	0	0	0	0	0	0	0	0	0	0	0	0
676	0	0	0	0	0	0	305	0	0	0	0	0	0	0	0	0	0	0
677	0	0	0	0	0	0	0	0	0	0	0	0	0	0	0	0	305	0
678	303	0	0	0	0	0	0	0	0	0	0	0	0	0	0	0	0	0
679	0	64	0	55	0	0	0	181	0	0	0	0	0	0	0	0	0	0
680	0	0	32	0	0	0	0	0	46	55	42	0	40	39	0	0	0	0
681	0	0	298	0	0	0	0	0	0	0	0	0	0	0	0	0	0	0
682	0	0	0	298	0	0	0	0	0	0	0	0	0	0	0	0	0	0
683	0	0	0	297	0	0	0	0	0	0	0	0	0	0	0	0	0	0
684	0	0	0	0	0	0	0	296	0	0	0	0	0	0	0	0	0	0
685	0	0	0	0	0	0	0	0	0	296	0	0	0	0	0	0	0	0
686	0	0	0	0	0	0	0	0	0	0	0	0	0	0	0	0	296	0
687	0	0	0	0	294	0	0	0	0	0	0	0	0	0	0	0	0	0
688	0	0	0	292	0	0	0	0	0	0	0	0	0	0	0	0	0	0
689	0	0	0	0	0	0	0	0	0	0	0	0	0	0	0	292	0	0
690	0	0	0	291	0	0	0	0	0	0	0	0	0	0	0	0	0	0
692	0	0	0	290	0	0	0	0	0	0	0	0	0	0	0	0	0	0
695	0	0	0	0	0	0	0	0	0	0	0	0	0	0	0	0	287	0
696	0	285	0	0	0	0	0	0	0	0	0	0	0	0	0	0	0	0
697	0	0	0	0	285	0	0	0	0	0	0	0	0	0	0	0	0	0
698	0	0	0	0	0	0	0	0	0	284	0	0	0	0	0	0	0	0
699	0	0	0	283	0	0	0	0	0	0	0	0	0	0	0	0	0	0
700	0	0	0	0	0	0	0	283	0	0	0	0	0	0	0	0	0	0
701	0	0	0	0	0	0	0	0	0	0	0	0	0	283	0	0	0	0
702	0	281	0	0	0	0	0	0	0	0	0	0	0	0	0	0	0	0
703	0	0	0	0	0	207	0	0	0	0	0	0	0	0	0	0	0	0
704	0	0	0	0	0	0	0	0	257	0	0	0	0	0	0	0	0	0
705	0	0	0	0	0	0	0	0	0	0	0	0	0	0	0	0	281	0
706	0	0	0	0	0	0	0	0	0	0	0	0	0	0	0	280	0	0
707	0	0	0	0	0	0	0	0	0	0	0	0	0	0	0	278	0	0
708	0	0	0	0	0	0	0	0	0	0	0	0	0	0	0	0	278	0
709	0	0	0	0	0	0	0	0	0	0	0	0	0	0	0	0	278	0
710	0	0	0	0	0	0	0	0	218	0	0	0	0	0	0	0	0	0
711	68	0	0	27	0	0	0	0	0	0	0	0	0	14	56	0	0	0
712	0	0	0	0	0	0	0	0	0	0	0	0	0	0	274	0	0	0
713	0	0	0	0	0	0	0	0	273	0	0	0	0	0	0	0	0	0
714	0	0	270	0	0	0	0	0	0	0	0	0	0	0	0	0	0	0
715	0	0	0	269	0	0	0	0	0	0	0	0	0	0	0	0	0	0
716	0	0	0	0	0	0	0	0	0	269	0	0	0	0	0	0	0	0
718	0	0	267	0	0	0	0	0	0	0	0	0	0	0	0	0	0	0
719	0	0	0	267	0	0	0	0	0	0	0	0	0	0	0	0	0	0
720	0	0	0	0	0	0	0	0	0	0	0	0	267	0	0	0	0	0
722	0	0	0	0	0	0	0	0	37	29	40	0	35	36	19	0	0	0
724	0	0	0	0	0	0	0	0	0	0	0	0	0	0	264	0	0	0
725	0	0	0	0	0	0	0	0	0	262	0	0	0	0	0	0	0	0
726	0	0	0	0	0	0	0	0	0	0	262	0	0	0	0	0	0	0
727	0	0	0	0	0	0	0	0	0	0	0	0	262	0	0	0	0	0
728	0	0	0	0	0	0	0	261	0	0	0	0	0	0	0	0	0	0
729	0	0	0	0	0	0	260	0	0	0	0	0	0	0	0	0	0	0
730	0	0	0	257	0	0	0	0	0	0	0	0	0	0	0	0	0	0
733	256	0	0	0	0	0	0	0	0	0	0	0	0	0	0	0	0	0
734	0	0	0	256	0	0	0	0	0	0	0	0	0	0	0	0	0	0
735	0	0	0	0	0	0	0	0	0	0	255	0	0	0	0	0	0	0
736	0	0	0	254	0	0	0	0	0	0	0	0	0	0	0	0	0	0
737	50	0	0	0	0	0	0	0	0	0	0	0	0	109	0	0	0	0
738	0	0	0	0	0	0	0	0	0	0	253	0	0	0	0	0	0	0
739	0	0	0	0	0	252	0	0	0	0	0	0	0	0	0	0	0	0
740	0	251	0	0	0	0	0	0	0	0	0	0	0	0	0	0	0	0
741	0	0	0	0	0	0	0	0	0	115	0	0	0	0	0	0	0	0
742	0	0	0	0	0	0	0	0	0	0	0	0	0	0	0	251	0	0
743	0	0	0	0	0	0	0	0	0	0	0	0	0	0	0	251	0	0
744	0	250	0	0	0	0	0	0	0	0	0	0	0	0	0	0	0	0
745	0	0	0	0	0	0	0	0	0	0	0	0	0	248	0	0	0	0
746	0	0	0	0	0	0	0	0	0	0	0	0	0	0	0	0	0	248
747	0	0	247	0	0	0	0	0	0	0	0	0	0	0	0	0	0	0
748	0	0	45	0	0	0	0	0	0	0	0	0	0	0	0	0	0	0
749	0	0	0	0	0	0	0	0	0	0	0	0	0	0	247	0	0	0
750	0	0	0	0	0	0	0	0	0	0	0	0	0	0	0	0	0	247
753	0	0	0	0	0	0	0	0	0	0	244	0	0	0	0	0	0	0
754	0	243	0	0	0	0	0	0	0	0	0	0	0	0	0	0	0	0
755	0	0	0	0	0	0	0	243	0	0	0	0	0	0	0	0	0	0
757	0	239	0	0	0	0	0	0	0	0	0	0	0	0	0	0	0	0
758	239	0	0	0	0	0	0	0	0	0	0	0	0	0	0	0	0	0
759	0	0	157	0	38	0	0	0	0	0	0	0	0	44	0	0	0	0
760	0	0	0	0	0	0	238	0	0	0	0	0	0	0	0	0	0	0
761	0	0	0	0	0	0	0	0	0	0	0	238	0	0	0	0	0	0
762	0	0	0	173	0	0	0	0	0	0	0	0	0	0	0	0	0	0
763	0	0	0	0	0	0	235	0	0	0	0	0	0	0	0	0	0	0
766	0	0	0	0	0	0	233	0	0	0	0	0	0	0	0	0	0	0
767	0	0	0	0	0	0	0	0	0	0	0	0	233	0	0	0	0	0
768	230	0	0	0	0	0	0	0	0	0	0	0	0	0	0	0	0	0
769	0	0	0	0	0	0	0	0	230	0	0	0	0	0	0	0	0	0
770	0	0	0	0	0	0	0	0	44	30	31	26	29	37	26	0	0	0
771	0	0	0	0	0	0	0	0	0	0	230	0	0	0	0	0	0	0
772	229	0	0	0	0	0	0	0	0	0	0	0	0	0	0	0	0	0
773	0	0	0	0	0	229	0	0	0	0	0	0	0	0	0	0	0	0
774	0	0	0	0	0	0	0	0	0	0	0	0	229	0	0	0	0	0
775	0	0	0	227	0	0	0	0	0	0	0	0	0	0	0	0	0	0
776	0	0	0	227	0	0	0	0	0	0	0	0	0	0	0	0	0	0
777	0	0	0	0	0	0	0	0	0	0	227	0	0	0	0	0	0	0
779	0	0	0	0	226	0	0	0	0	0	0	0	0	0	0	0	0	0
780	0	0	0	225	0	0	0	0	0	0	0	0	0	0	0	0	0	0
782	0	0	0	223	0	0	0	0	0	0	0	0	0	0	0	0	0	0
783	0	0	0	0	0	0	0	0	223	0	0	0	0	0	0	0	0	0
784	0	0	0	0	0	0	0	0	0	0	0	0	223	0	0	0	0	0
785	0	0	0	0	0	0	0	0	0	0	0	0	0	0	223	0	0	0
786	0	0	0	221	0	0	0	0	0	0	0	0	0	0	0	0	0	0
787	0	0	0	0	0	0	0	0	0	0	0	0	0	0	0	0	221	0
788	0	0	0	0	0	0	0	0	220	0	0	0	0	0	0	0	0	0
789	0	0	0	0	0	0	0	0	220	0	0	0	0	0	0	0	0	0
790	0	0	0	219	0	0	0	0	0	0	0	0	0	0	0	0	0	0
792	0	22	169	0	0	11	0	0	0	15	0	0	0	0	0	0	0	0
793	217	0	0	0	0	0	0	0	0	0	0	0	0	0	0	0	0	0
794	0	0	194	0	0	0	0	0	0	0	0	0	23	0	0	0	0	0
795	0	0	0	23	6	0	0	0	0	0	0	0	31	0	0	130	0	0
796	0	0	0	0	0	0	217	0	0	0	0	0	0	0	0	0	0	0
797	0	0	0	0	0	0	0	0	0	0	217	0	0	0	0	0	0	0
798	216	0	0	0	0	0	0	0	0	0	0	0	0	0	0	0	0	0
799	0	0	0	0	0	0	0	216	0	0	0	0	0	0	0	0	0	0
801	0	215	0	0	0	0	0	0	0	0	0	0	0	0	0	0	0	0
802	0	0	0	0	0	0	0	0	0	0	0	0	215	0	0	0	0	0
804	0	117	97	0	0	0	0	0	0	0	0	0	0	0	0	0	0	0
805	209	0	0	0	0	0	0	0	0	0	0	0	4	0	0	0	0	0
807	0	0	0	0	0	0	0	0	0	0	0	0	210	0	0	0	0	0
808	0	0	0	0	0	0	0	209	0	0	0	0	0	0	0	0	0	0
809	0	0	0	0	0	0	0	0	208	0	0	0	0	0	0	0	0	0
810	0	0	0	0	0	0	0	0	0	0	0	0	0	207	0	0	0	0
811	0	0	0	0	0	0	0	0	0	0	0	0	206	0	0	0	0	0
812	0	0	0	0	0	0	0	0	0	0	0	0	0	0	0	0	0	206
813	0	0	0	204	0	0	0	0	0	0	0	0	0	0	0	0	0	0
814	0	203	0	0	0	0	0	0	0	0	0	0	0	0	0	0	0	0
816	202	0	0	0	0	0	0	0	0	0	0	0	0	0	0	0	0	0
817	0	0	202	0	0	0	0	0	0	0	0	0	0	0	0	0	0	0
818	0	201	0	0	0	0	0	0	0	0	0	0	0	0	0	0	0	0
819	0	0	200	0	0	0	0	0	0	0	0	0	0	0	0	0	0	0
820	0	0	0	0	0	0	0	0	0	0	0	0	0	0	0	0	0	200
821	0	0	197	0	0	0	0	0	0	0	0	0	0	0	0	0	0	0
822	0	0	0	0	0	0	0	196	0	0	0	0	0	0	0	0	0	0
823	0	195	0	0	0	0	0	0	0	0	0	0	0	0	0	0	0	0
824	0	0	11	0	0	0	0	0	0	0	0	0	184	0	0	0	0	0
826	0	0	0	0	0	0	0	0	0	0	0	0	0	0	0	0	194	0
827	0	193	0	0	0	0	0	0	0	0	0	0	0	0	0	0	0	0
828	193	0	0	0	0	0	0	0	0	0	0	0	0	0	0	0	0	0
829	0	0	0	40	0	0	0	0	0	153	0	0	0	0	0	0	0	0
830	0	0	0	0	0	0	0	0	0	193	0	0	0	0	0	0	0	0
831	0	0	0	0	0	0	0	0	0	0	0	0	0	0	193	0	0	0
832	0	0	0	0	0	0	0	0	0	0	0	0	0	0	0	0	193	0
833	0	0	0	0	0	0	0	0	0	0	0	0	0	0	192	0	0	0
834	0	0	0	0	0	0	0	0	0	0	0	0	0	0	0	0	0	191
835	190	0	0	0	0	0	0	0	0	0	0	0	0	0	0	0	0	0
836	0	0	0	0	0	0	0	190	0	0	0	0	0	0	0	0	0	0
837	0	0	0	0	0	0	0	0	0	190	0	0	0	0	0	0	0	0
838	0	189	0	0	0	0	0	0	0	0	0	0	0	0	0	0	0	0
840	186	0	0	0	0	0	0	0	0	0	0	0	0	0	0	0	0	0
841	0	0	0	0	0	0	0	186	0	0	0	0	0	0	0	0	0	0
842	0	0	0	0	0	0	0	0	0	0	186	0	0	0	0	0	0	0
843	0	0	0	0	0	0	0	0	0	0	0	0	0	186	0	0	0	0
844	0	0	0	0	0	0	0	0	0	0	0	0	0	58	0	0	0	0
845	0	0	0	0	185	0	0	0	0	0	0	0	0	0	0	0	0	0
846	0	0	0	0	0	185	0	0	0	0	0	0	0	0	0	0	0	0
847	0	0	0	0	0	0	0	0	0	0	0	185	0	0	0	0	0	0
848	0	0	0	0	0	0	0	0	0	0	0	0	185	0	0	0	0	0
849	184	0	0	0	0	0	0	0	0	0	0	0	0	0	0	0	0	0
850	0	0	0	0	0	0	0	0	0	184	0	0	0	0	0	0	0	0
851	0	0	0	0	0	0	0	0	0	37	0	0	0	0	19	128	0	0
852	0	0	0	0	0	0	0	0	0	0	184	0	0	0	0	0	0	0
853	0	0	7	10	0	0	8	6	15	9	17	17	6	0	14	16	17	8
854	0	0	0	0	0	0	0	183	0	0	0	0	0	0	0	0	0	0
855	0	0	0	0	0	0	0	0	0	0	0	0	0	0	0	183	0	0
856	0	0	0	182	0	0	0	0	0	0	0	0	0	0	0	0	0	0
857	0	0	0	0	154	0	0	0	0	0	0	0	0	24	0	0	0	0
858	0	0	0	0	0	0	0	0	0	0	0	0	0	0	0	182	0	0
859	0	181	0	0	0	0	0	0	0	0	0	0	0	0	0	0	0	0
860	0	0	0	0	0	0	0	0	0	0	180	0	0	0	0	0	0	0
862	0	179	0	0	0	0	0	0	0	0	0	0	0	0	0	0	0	0
863	0	0	0	0	0	0	0	0	0	0	0	0	0	179	0	0	0	0
864	0	178	0	0	0	0	0	0	0	0	0	0	0	0	0	0	0	0
865	0	0	178	0	0	0	0	0	0	0	0	0	0	0	0	0	0	0
866	115	0	0	0	34	0	28	0	0	0	0	0	0	0	0	0	0	0
867	0	0	0	0	0	0	0	0	0	0	0	0	0	0	177	0	0	0
869	0	0	0	0	0	0	0	0	0	0	0	0	0	0	0	177	0	0
870	0	175	0	0	0	0	0	0	0	0	0	0	0	0	0	0	0	0
872	0	0	0	0	0	0	174	0	0	0	0	0	0	0	0	0	0	0
873	0	0	0	0	0	0	0	0	0	0	174	0	0	0	0	0	0	0
874	0	0	0	0	0	0	0	0	0	0	0	0	0	174	0	0	0	0
875	0	0	0	0	0	0	0	0	0	0	0	0	0	0	0	0	0	174
876	0	0	0	0	0	0	173	0	0	0	0	0	0	0	0	0	0	0
877	0	0	0	0	0	0	0	0	0	0	0	0	0	0	0	172	0	0
878	0	0	0	5	166	0	0	0	0	0	0	0	0	0	0	0	0	0
879	0	0	0	0	0	0	0	0	0	0	0	0	0	0	171	0	0	0
880	0	0	0	0	0	0	0	0	0	0	0	0	0	0	0	0	0	171
881	0	0	0	0	0	0	0	0	169	0	0	0	0	0	0	0	0	0
882	0	168	0	0	0	0	0	0	0	0	0	0	0	0	0	0	0	0
883	0	0	0	0	0	0	0	0	0	0	0	0	0	0	168	0	0	0
884	0	0	0	0	0	0	0	0	0	167	0	0	0	0	0	0	0	0
885	0	0	0	0	0	0	0	0	0	0	0	0	0	166	0	0	0	0
886	0	165	0	0	0	0	0	0	0	0	0	0	0	0	0	0	0	0
887	0	0	0	0	0	0	165	0	0	0	0	0	0	0	0	0	0	0
888	0	0	0	164	0	0	0	0	0	0	0	0	0	0	0	0	0	0
891	0	0	0	0	0	0	0	0	0	0	0	0	0	0	0	0	0	126
892	0	0	0	0	0	0	163	0	0	0	0	0	0	0	0	0	0	0
893	0	0	0	0	0	0	0	0	0	0	0	0	163	0	0	0	0	0
896	0	0	161	0	0	0	0	0	0	0	0	0	0	0	0	0	0	0
897	0	0	0	0	0	0	161	0	0	0	0	0	0	0	0	0	0	0
898	0	8	0	9	1	0	0	3	0	20	38	14	24	5	0	0	0	0
899	0	0	0	0	0	0	0	0	0	160	0	0	0	0	0	0	0	0
900	0	159	0	0	0	0	0	0	0	0	0	0	0	0	0	0	0	0
901	0	0	0	0	0	0	5	0	0	0	0	0	0	0	0	0	0	0
902	0	0	0	0	158	0	0	0	0	0	0	0	0	0	0	0	0	0
903	0	0	0	0	0	0	0	0	0	158	0	0	0	0	0	0	0	0
904	0	0	0	0	0	0	0	0	0	0	158	0	0	0	0	0	0	0
905	0	0	0	0	0	0	0	0	0	0	158	0	0	0	0	0	0	0
906	0	0	0	0	0	0	0	0	0	0	0	0	0	0	0	0	158	0
907	157	0	0	0	0	0	0	0	0	0	0	0	0	0	0	0	0	0
908	0	0	157	0	0	0	0	0	0	0	0	0	0	0	0	0	0	0
909	0	0	0	157	0	0	0	0	0	0	0	0	0	0	0	0	0	0
910	0	0	0	30	0	0	0	0	0	31	0	0	0	0	0	0	0	0
911	0	0	0	0	0	156	0	0	0	0	0	0	0	0	0	0	0	0
913	0	0	0	0	0	0	0	0	0	0	0	0	0	0	0	156	0	0
914	0	0	0	0	0	0	155	0	0	0	0	0	0	0	0	0	0	0
915	0	0	0	0	0	0	0	0	0	0	0	0	155	0	0	0	0	0
916	0	0	0	0	0	0	0	0	0	0	0	0	0	0	0	0	0	155
917	0	154	0	0	0	0	0	0	0	0	0	0	0	0	0	0	0	0
919	0	0	0	0	0	153	0	0	0	0	0	0	0	0	0	0	0	0
920	0	0	0	0	0	0	0	0	0	0	0	0	0	0	153	0	0	0
922	0	0	0	0	0	0	0	0	0	0	0	0	0	0	0	0	0	153
923	0	0	0	0	152	0	0	0	0	0	0	0	0	0	0	0	0	0
924	0	0	0	0	0	152	0	0	0	0	0	0	0	0	0	0	0	0
925	0	0	0	0	0	0	0	0	152	0	0	0	0	0	0	0	0	0
927	0	0	0	0	0	0	0	0	0	0	0	0	0	0	0	152	0	0
928	0	0	0	0	0	0	0	0	0	0	0	0	0	0	0	0	152	0
929	0	0	0	151	0	0	0	0	0	0	0	0	0	0	0	0	0	0
930	0	0	0	0	14	10	9	0	0	0	0	0	0	0	0	0	35	0
931	0	0	0	0	0	0	33	0	0	0	0	0	0	0	0	0	108	0
932	0	0	0	0	0	0	0	0	0	0	0	0	0	0	151	0	0	0
933	0	0	0	0	0	150	0	0	0	0	0	0	0	0	0	0	0	0
934	0	0	0	0	0	0	0	0	0	150	0	0	0	0	0	0	0	0
935	0	0	0	0	0	0	0	0	0	0	0	0	150	0	0	0	0	0
936	0	0	149	0	0	0	0	0	0	0	0	0	0	0	0	0	0	0
937	0	0	0	0	0	0	0	149	0	0	0	0	0	0	0	0	0	0
938	0	0	0	0	0	0	0	0	0	0	0	0	0	0	149	0	0	0
939	0	148	0	0	0	0	0	0	0	0	0	0	0	0	0	0	0	0
940	0	148	0	0	0	0	0	0	0	0	0	0	0	0	0	0	0	0
941	0	0	0	0	0	0	20	0	0	0	0	0	20	32	41	0	0	0
942	0	0	0	0	0	0	0	0	148	0	0	0	0	0	0	0	0	0
944	0	0	0	0	0	0	0	0	0	0	0	0	0	0	147	0	0	0
946	0	0	0	0	146	0	0	0	0	0	0	0	0	0	0	0	0	0
947	0	0	0	0	0	0	146	0	0	0	0	0	0	0	0	0	0	0
948	0	0	0	0	0	0	0	0	146	0	0	0	0	0	0	0	0	0
950	0	145	0	0	0	0	0	0	0	0	0	0	0	0	0	0	0	0
951	14	0	25	0	9	0	0	0	0	13	28	28	0	0	0	28	0	0
952	0	0	0	0	0	0	0	145	0	0	0	0	0	0	0	0	0	0
953	0	0	0	0	0	0	0	0	0	0	145	0	0	0	0	0	0	0
954	0	0	0	0	0	0	0	0	0	0	0	0	145	0	0	0	0	0
955	0	0	0	0	0	0	0	0	0	0	0	0	0	0	0	0	0	145
956	0	0	0	0	144	0	0	0	0	0	0	0	0	0	0	0	0	0
957	0	0	0	0	0	144	0	0	0	0	0	0	0	0	0	0	0	0
958	0	0	0	0	0	0	0	0	144	0	0	0	0	0	0	0	0	0
959	126	0	0	0	0	0	0	0	0	0	0	0	0	17	0	0	0	0
960	0	0	0	0	142	0	0	0	0	0	0	0	0	0	0	0	0	0
961	0	0	0	0	0	0	0	0	141	0	0	0	0	0	0	0	0	0
962	0	0	0	0	0	0	0	0	0	0	0	0	0	0	0	0	141	0
963	0	0	140	0	0	0	0	0	0	0	0	0	0	0	0	0	0	0
964	0	0	0	0	0	0	0	0	0	0	0	140	0	0	0	0	0	0
965	0	0	0	0	0	0	0	0	0	0	0	139	0	0	0	0	0	0
966	0	0	138	0	0	0	0	0	0	0	0	0	0	0	0	0	0	0
967	0	0	0	0	0	0	138	0	0	0	0	0	0	0	0	0	0	0
968	0	0	0	0	0	0	0	0	0	0	138	0	0	0	0	0	0	0
969	0	0	0	0	0	0	0	0	0	0	0	138	0	0	0	0	0	0
970	0	0	0	0	0	0	137	0	0	0	0	0	0	0	0	0	0	0
971	0	0	136	0	0	0	0	0	0	0	0	0	0	0	0	0	0	0
972	0	0	0	0	0	0	0	0	136	0	0	0	0	0	0	0	0	0
973	0	0	0	0	0	0	0	0	0	0	0	0	0	0	0	0	0	136
974	0	0	0	0	0	0	0	0	0	0	0	0	135	0	0	0	0	0
975	134	0	0	0	0	0	0	0	0	0	0	0	0	0	0	0	0	0
976	0	0	0	0	0	0	0	0	134	0	0	0	0	0	0	0	0	0
977	0	0	0	0	0	0	0	0	0	0	0	0	0	25	0	0	0	0
979	0	133	0	0	0	0	0	0	0	0	0	0	0	0	0	0	0	0
981	0	0	9	9	16	0	10	0	13	8	0	12	13	10	0	6	0	14
983	0	131	0	0	0	0	0	0	0	0	0	0	0	0	0	0	0	0
984	0	0	0	131	0	0	0	0	0	0	0	0	0	0	0	0	0	0
985	0	0	0	0	0	0	0	0	131	0	0	0	0	0	0	0	0	0
986	0	0	0	0	0	0	0	0	0	0	0	0	0	131	0	0	0	0
987	0	0	130	0	0	0	0	0	0	0	0	0	0	0	0	0	0	0
988	0	0	130	0	0	0	0	0	0	0	0	0	0	0	0	0	0	0
989	0	0	130	0	0	0	0	0	0	0	0	0	0	0	0	0	0	0
990	0	0	0	130	0	0	0	0	0	0	0	0	0	0	0	0	0	0
991	0	0	0	0	0	0	130	0	0	0	0	0	0	0	0	0	0	0
992	0	0	0	0	0	0	0	0	0	0	130	0	0	0	0	0	0	0
994	0	0	4	0	0	0	0	0	0	6	14	13	16	11	8	7	8	13
995	0	0	0	0	0	0	0	0	0	129	0	0	0	0	0	0	0	0
996	0	0	0	0	0	0	0	0	0	0	0	0	0	0	0	129	0	0
997	0	14	0	0	0	0	0	21	27	0	0	33	0	0	0	0	0	0
998	29	11	0	0	0	0	14	0	0	40	0	0	25	0	0	0	0	0
999	0	0	0	0	0	0	0	128	0	0	0	0	0	0	0	0	0	0
1000	127	0	0	0	0	0	0	0	0	0	0	0	0	0	0	0	0	0
1001	0	0	0	127	0	0	0	0	0	0	0	0	0	0	0	0	0	0
1002	126	0	0	0	0	0	0	0	0	0	0	0	0	0	0	0	0	0
1003	0	0	126	0	0	0	0	0	0	0	0	0	0	0	0	0	0	0
1004	0	0	0	0	0	0	0	0	0	0	0	126	0	0	0	0	0	0
1005	0	0	0	0	0	0	0	0	0	0	0	0	125	0	0	0	0	0
1006	0	0	0	0	0	0	0	0	0	0	0	0	125	0	0	0	0	0
1007	0	0	0	0	0	0	0	0	0	0	0	0	0	125	0	0	0	0
1008	0	0	0	0	0	0	0	0	0	0	0	0	0	0	0	125	0	0
1009	0	124	0	0	0	0	0	0	0	0	0	0	0	0	0	0	0	0
1010	0	0	0	0	0	0	0	0	0	0	0	0	0	0	0	0	0	124
1011	0	0	0	0	0	0	0	0	123	0	0	0	0	0	0	0	0	0
1012	0	0	0	0	0	122	0	0	0	0	0	0	0	0	0	0	0	0
1013	0	0	0	0	0	0	0	0	0	122	0	0	0	0	0	0	0	0
1014	0	0	0	0	0	0	0	0	0	0	122	0	0	0	0	0	0	0
1015	121	0	0	0	0	0	0	0	0	0	0	0	0	0	0	0	0	0
1016	121	0	0	0	0	0	0	0	0	0	0	0	0	0	0	0	0	0
1017	0	0	121	0	0	0	0	0	0	0	0	0	0	0	0	0	0	0
1018	0	0	0	0	0	0	0	121	0	0	0	0	0	0	0	0	0	0
1019	0	0	0	0	0	0	0	0	0	121	0	0	0	0	0	0	0	0
1021	120	0	0	0	0	0	0	0	0	0	0	0	0	0	0	0	0	0
1023	119	0	0	0	0	0	0	0	0	0	0	0	0	0	0	0	0	0
1024	0	0	0	0	0	0	0	0	0	0	27	0	0	92	0	0	0	0
1025	0	0	0	0	0	0	118	0	0	0	0	0	0	0	0	0	0	0
1026	0	0	0	0	0	0	0	0	24	15	0	0	10	15	14	6	0	10
1027	0	0	0	0	0	0	0	0	0	0	0	0	0	0	118	0	0	0
1028	39	0	0	0	0	0	0	11	0	0	44	0	0	0	0	0	0	0
1029	0	0	0	19	0	0	0	0	26	0	0	0	24	0	0	22	0	0
1030	0	0	0	0	0	0	0	0	0	0	0	0	0	0	117	0	0	0
1032	46	0	10	5	0	0	0	0	0	0	0	0	55	0	0	0	0	0
1033	0	0	70	0	0	0	0	0	0	0	0	0	0	0	0	0	46	0
1034	0	0	0	116	0	0	0	0	0	0	0	0	0	0	0	0	0	0
1035	0	0	0	0	116	0	0	0	0	0	0	0	0	0	0	0	0	0
1036	0	58	0	0	0	0	5	0	0	0	27	0	0	0	0	0	0	0
1037	0	0	0	0	0	115	0	0	0	0	0	0	0	0	0	0	0	0
1039	0	0	0	0	0	0	0	0	0	0	0	0	0	0	0	115	0	0
1040	0	0	114	0	0	0	0	0	0	0	0	0	0	0	0	0	0	0
1041	0	0	0	0	0	0	0	0	0	114	0	0	0	0	0	0	0	0
1042	0	0	0	0	0	0	0	0	0	0	0	0	0	114	0	0	0	0
1043	0	0	0	113	0	0	0	0	0	0	0	0	0	0	0	0	0	0
1044	0	0	0	0	0	0	0	0	0	0	0	0	0	113	0	0	0	0
1045	0	0	0	0	0	112	0	0	0	0	0	0	0	0	0	0	0	0
1046	0	0	0	0	0	0	0	0	0	0	0	0	0	0	112	0	0	0
1048	0	0	0	0	0	0	0	111	0	0	0	0	0	0	0	0	0	0
1049	0	0	0	0	0	0	0	0	0	0	111	0	0	0	0	0	0	0
1051	0	0	0	0	0	0	0	0	0	0	0	0	0	0	0	111	0	0
1052	0	0	0	0	0	0	0	0	0	0	0	0	0	0	0	0	111	0
1053	0	0	0	0	0	0	0	27	0	0	0	0	0	0	0	0	0	0
1054	0	0	109	0	0	0	0	0	0	0	0	0	0	0	0	0	0	0
1055	0	0	0	0	0	0	0	0	0	0	0	0	109	0	0	0	0	0
1056	0	0	0	0	0	0	0	0	0	0	0	0	0	109	0	0	0	0
1057	0	108	0	0	0	0	0	0	0	0	0	0	0	0	0	0	0	0
1058	0	13	0	0	0	0	0	7	0	12	13	10	3	0	0	9	9	0
1059	108	0	0	0	0	0	0	0	0	0	0	0	0	0	0	0	0	0
1060	0	0	0	108	0	0	0	0	0	0	0	0	0	0	0	0	0	0
1061	0	0	0	18	0	0	0	0	0	10	26	0	19	10	0	0	0	11
1062	0	0	0	0	0	0	0	0	0	0	108	0	0	0	0	0	0	0
1063	0	0	0	0	107	0	0	0	0	0	0	0	0	0	0	0	0	0
1064	0	0	0	0	0	107	0	0	0	0	0	0	0	0	0	0	0	0
1065	0	0	0	0	0	0	0	0	0	0	0	0	107	0	0	0	0	0
1066	0	0	0	0	0	0	0	0	0	0	0	0	0	107	0	0	0	0
1067	0	0	0	0	0	0	0	0	0	0	0	0	0	0	107	0	0	0
1069	106	0	0	0	0	0	0	0	0	0	0	0	0	0	0	0	0	0
1070	1	0	0	57	0	0	0	0	0	24	0	0	0	0	0	0	0	0
1071	0	0	0	0	0	0	11	0	0	0	0	84	0	11	0	0	0	0
1072	0	0	0	0	0	0	0	0	0	0	0	0	106	0	0	0	0	0
1073	0	0	0	0	0	0	0	0	0	0	0	0	0	0	106	0	0	0
1075	0	0	0	0	0	0	0	0	0	0	0	105	0	0	0	0	0	0
1076	0	0	0	0	0	0	0	0	0	0	0	0	0	0	0	0	98	0
1077	0	0	0	0	0	0	0	0	0	0	0	0	0	0	0	0	0	105
1078	0	0	0	0	0	0	0	0	0	0	0	0	0	0	0	0	0	105
1079	104	0	0	0	0	0	0	0	0	0	0	0	0	0	0	0	0	0
1080	0	0	0	0	0	104	0	0	0	0	0	0	0	0	0	0	0	0
1081	0	0	0	0	0	104	0	0	0	0	0	0	0	0	0	0	0	0
1082	0	0	0	0	0	0	104	0	0	0	0	0	0	0	0	0	0	0
1083	0	0	0	0	0	0	0	0	104	0	0	0	0	0	0	0	0	0
1084	0	0	0	0	0	0	0	0	0	0	0	0	0	104	0	0	0	0
1087	0	0	0	0	0	0	0	0	0	0	0	0	0	0	0	0	104	0
1088	0	22	0	0	0	15	0	0	27	0	0	0	0	0	0	0	25	0
1089	18	0	8	0	0	0	0	0	19	20	13	0	14	0	11	0	0	0
1090	0	0	0	0	0	103	0	0	0	0	0	0	0	0	0	0	0	0
1091	0	0	0	0	0	0	0	0	0	0	0	0	0	103	0	0	0	0
1093	0	0	0	0	0	0	102	0	0	0	0	0	0	0	0	0	0	0
1096	0	0	0	0	0	0	0	0	0	0	0	0	0	0	0	0	102	0
1097	0	0	101	0	0	0	0	0	0	0	0	0	0	0	0	0	0	0
1098	0	0	0	0	0	101	0	0	0	0	0	0	0	0	0	0	0	0
1099	0	0	0	0	0	0	101	0	0	0	0	0	0	0	0	0	0	0
1100	0	0	0	0	0	0	0	0	0	0	0	0	0	101	0	0	0	0
1102	0	0	0	100	0	0	0	0	0	0	0	0	0	0	0	0	0	0
1103	0	0	0	0	0	0	0	0	0	100	0	0	0	0	0	0	0	0
1104	0	0	0	0	0	0	0	0	0	100	0	0	0	0	0	0	0	0
1105	0	0	0	0	0	0	0	0	0	0	0	0	0	100	0	0	0	0
1106	99	0	0	0	0	0	0	0	0	0	0	0	0	0	0	0	0	0
1107	0	0	0	99	0	0	0	0	0	0	0	0	0	0	0	0	0	0
1108	0	0	0	0	0	0	0	0	0	99	0	0	0	0	0	0	0	0
1109	0	0	0	0	0	0	0	0	0	0	0	99	0	0	0	0	0	0
1110	0	0	0	0	0	0	0	0	0	0	0	0	99	0	0	0	0	0
1111	0	98	0	0	0	0	0	0	0	0	0	0	0	0	0	0	0	0
1112	0	0	0	0	0	0	0	98	0	0	0	0	0	0	0	0	0	0
1113	0	0	0	0	0	0	0	0	0	0	0	0	0	0	0	0	98	0
1114	97	0	0	0	0	0	0	0	0	0	0	0	0	0	0	0	0	0
1115	0	0	0	97	0	0	0	0	0	0	0	0	0	0	0	0	0	0
1116	0	0	0	0	0	0	0	0	0	97	0	0	0	0	0	0	0	0
1117	0	0	0	0	0	0	0	0	0	0	0	0	0	97	0	0	0	0
1119	0	0	0	0	0	0	0	0	0	0	0	0	0	0	0	97	0	0
1120	96	0	0	0	0	0	0	0	0	0	0	0	0	0	0	0	0	0
1121	0	0	0	0	96	0	0	0	0	0	0	0	0	0	0	0	0	0
1122	0	0	0	0	0	0	96	0	0	0	0	0	0	0	0	0	0	0
1123	0	0	0	0	0	0	0	0	0	0	0	0	0	96	0	0	0	0
1124	0	0	95	0	0	0	0	0	0	0	0	0	0	0	0	0	0	0
1125	0	0	0	95	0	0	0	0	0	0	0	0	0	0	0	0	0	0
1126	0	0	0	0	0	95	0	0	0	0	0	0	0	0	0	0	0	0
1127	0	0	0	0	0	0	0	95	0	0	0	0	0	0	0	0	0	0
1128	0	0	0	0	0	0	0	95	0	0	0	0	0	0	0	0	0	0
1129	0	0	0	0	0	0	0	0	0	0	0	95	0	0	0	0	0	0
1131	0	0	0	0	0	0	0	0	0	0	0	0	0	0	0	95	0	0
1132	0	0	0	0	0	0	0	0	0	0	0	0	0	0	0	0	0	95
1133	94	0	0	0	0	0	0	0	0	0	0	0	0	0	0	0	0	0
1134	94	0	0	0	0	0	0	0	0	0	0	0	0	0	0	0	0	0
1135	0	0	94	0	0	0	0	0	0	0	0	0	0	0	0	0	0	0
1136	0	0	0	0	0	94	0	0	0	0	0	0	0	0	0	0	0	0
1137	0	0	0	0	0	94	0	0	0	0	0	0	0	0	0	0	0	0
1138	0	0	0	0	0	0	94	0	0	0	0	0	0	0	0	0	0	0
1139	0	0	0	0	0	0	0	0	0	94	0	0	0	0	0	0	0	0
1140	0	0	0	0	0	0	0	0	0	0	0	0	0	0	94	0	0	0
1141	0	0	0	0	0	0	0	0	0	0	0	0	0	0	94	0	0	0
1142	0	0	0	0	0	0	0	0	0	0	0	0	0	0	0	0	94	0
1143	0	93	0	0	0	0	0	0	0	0	0	0	0	0	0	0	0	0
1144	0	0	0	0	0	0	93	0	0	0	0	0	0	0	0	0	0	0
1145	0	0	0	0	0	0	0	93	0	0	0	0	0	0	0	0	0	0
1146	0	0	0	0	0	0	0	0	0	0	0	0	0	0	0	93	0	0
1147	0	0	0	0	0	0	0	0	0	0	0	0	0	0	0	0	93	0
1148	0	0	0	0	0	92	0	0	0	0	0	0	0	0	0	0	0	0
1149	0	0	0	0	0	0	0	0	0	92	0	0	0	0	0	0	0	0
1150	0	0	0	0	0	0	0	0	0	0	0	0	0	0	92	0	0	0
1151	0	91	0	0	0	0	0	0	0	0	0	0	0	0	0	0	0	0
1152	0	0	0	0	0	0	0	0	0	91	0	0	0	0	0	0	0	0
1154	0	0	0	0	0	0	0	0	0	0	0	0	0	0	0	0	0	91
1155	65	0	0	0	0	0	0	0	0	0	0	0	0	0	25	0	0	0
1156	0	0	0	0	90	0	0	0	0	0	0	0	0	0	0	0	0	0
1157	0	0	0	0	0	0	0	0	0	90	0	0	0	0	0	0	0	0
1158	0	0	0	0	0	0	0	0	0	0	0	0	0	0	0	0	90	0
1159	0	0	0	0	0	0	0	89	0	0	0	0	0	0	0	0	0	0
1160	0	0	0	0	0	0	0	0	0	12	12	65	0	0	0	0	0	0
1161	0	0	0	0	0	0	0	0	0	0	0	0	0	0	89	0	0	0
1162	7	0	0	9	25	0	6	0	0	0	0	0	0	0	0	0	0	0
1163	0	0	0	88	0	0	0	0	0	0	0	0	0	0	0	0	0	0
1164	0	0	0	0	0	0	0	0	0	88	0	0	0	0	0	0	0	0
1165	0	0	0	0	0	0	0	0	0	88	0	0	0	0	0	0	0	0
1166	0	0	0	0	0	0	0	0	0	88	0	0	0	0	0	0	0	0
1168	87	0	0	0	0	0	0	0	0	0	0	0	0	0	0	0	0	0
1169	0	0	87	0	0	0	0	0	0	0	0	0	0	0	0	0	0	0
1170	0	0	0	0	0	0	0	0	0	87	0	0	0	0	0	0	0	0
1171	53	0	0	0	0	0	0	0	0	0	0	0	4	0	0	0	0	0
1172	0	0	0	0	36	0	0	0	0	0	0	0	0	0	0	0	0	0
1173	0	0	0	0	0	0	86	0	0	0	0	0	0	0	0	0	0	0
1174	0	0	0	0	0	0	0	0	0	0	0	0	0	0	86	0	0	0
1177	0	85	0	0	0	0	0	0	0	0	0	0	0	0	0	0	0	0
1178	0	0	0	85	0	0	0	0	0	0	0	0	0	0	0	0	0	0
1179	0	0	0	0	0	85	0	0	0	0	0	0	0	0	0	0	0	0
1180	0	0	0	0	0	0	0	0	85	0	0	0	0	0	0	0	0	0
1182	0	0	0	0	0	0	0	0	0	0	0	0	0	0	0	0	85	0
1183	0	0	0	84	0	0	0	0	0	0	0	0	0	0	0	0	0	0
1184	0	0	0	0	0	0	0	0	0	0	0	0	0	0	0	0	0	84
1185	0	0	0	0	0	0	0	0	0	0	0	0	0	0	0	0	0	84
1186	83	0	0	0	0	0	0	0	0	0	0	0	0	0	0	0	0	0
1187	0	0	0	0	0	0	0	0	83	0	0	0	0	0	0	0	0	0
1188	0	0	0	0	0	0	0	0	0	83	0	0	0	0	0	0	0	0
1189	0	0	0	0	0	0	0	0	0	0	0	0	0	0	83	0	0	0
1190	0	0	0	0	0	0	0	0	0	0	0	0	0	0	0	83	0	0
1191	0	0	0	0	0	0	0	0	0	82	0	0	0	0	0	0	0	0
1193	0	0	0	0	0	0	0	0	0	0	0	0	0	0	0	0	0	82
1194	0	81	0	0	0	0	0	0	0	0	0	0	0	0	0	0	0	0
1195	0	0	0	81	0	0	0	0	0	0	0	0	0	0	0	0	0	0
1196	0	0	0	0	81	0	0	0	0	0	0	0	0	0	0	0	0	0
1197	0	0	0	0	0	0	81	0	0	0	0	0	0	0	0	0	0	0
1198	0	0	0	0	0	0	0	81	0	0	0	0	0	0	0	0	0	0
1199	0	0	0	0	0	0	0	0	0	0	74	0	0	0	7	0	0	0
1200	0	80	0	0	0	0	0	0	0	0	0	0	0	0	0	0	0	0
1201	0	0	0	0	0	0	0	0	0	0	80	0	0	0	0	0	0	0
1202	0	0	0	0	0	0	0	0	0	0	80	0	0	0	0	0	0	0
1203	0	0	0	0	0	0	0	0	79	0	0	0	0	0	0	0	0	0
1205	0	0	0	0	0	0	0	0	0	0	0	0	0	0	0	0	0	79
1206	0	0	0	0	0	0	0	0	0	78	0	0	0	0	0	0	0	0
1208	0	0	77	0	0	0	0	0	0	0	0	0	0	0	0	0	0	0
1209	0	0	0	0	0	0	0	0	0	77	0	0	0	0	0	0	0	0
1210	0	0	0	0	0	0	0	0	0	0	0	0	0	77	0	0	0	0
1211	0	76	0	0	0	0	0	0	0	0	0	0	0	0	0	0	0	0
1212	76	0	0	0	0	0	0	0	0	0	0	0	0	0	0	0	0	0
1213	0	0	0	7	0	0	0	0	0	0	0	0	0	0	0	0	0	69
1214	0	0	0	0	0	0	0	0	0	0	0	0	0	76	0	0	0	0
1215	0	0	0	0	0	0	0	0	0	0	0	0	0	76	0	0	0	0
1216	0	0	0	0	0	0	0	0	0	0	0	0	0	0	76	0	0	0
1219	0	75	0	0	0	0	0	0	0	0	0	0	0	0	0	0	0	0
1220	0	75	0	0	0	0	0	0	0	0	0	0	0	0	0	0	0	0
1221	0	0	0	0	0	0	0	0	0	0	0	0	0	75	0	0	0	0
1222	0	0	0	0	0	0	0	0	0	0	0	0	0	0	75	0	0	0
1223	0	0	0	0	0	0	0	0	0	0	0	0	0	0	0	0	75	0
1224	0	0	74	0	0	0	0	0	0	0	0	0	0	0	0	0	0	0
1225	0	0	74	0	0	0	0	0	0	0	0	0	0	0	0	0	0	0
1226	0	0	0	0	73	0	0	0	0	0	0	0	0	0	0	0	0	0
1227	0	0	0	0	0	0	0	0	0	73	0	0	0	0	0	0	0	0
1228	0	0	0	0	0	0	0	0	0	0	73	0	0	0	0	0	0	0
1229	0	0	0	0	0	0	0	0	0	0	73	0	0	0	0	0	0	0
1231	0	6	0	0	0	0	0	0	15	7	4	13	0	0	0	5	10	0
1232	72	0	0	0	0	0	0	0	0	0	0	0	0	0	0	0	0	0
1233	0	0	72	0	0	0	0	0	0	0	0	0	0	0	0	0	0	0
1234	0	0	0	0	0	0	0	0	72	0	0	0	0	0	0	0	0	0
1235	0	0	0	0	0	0	0	0	6	0	21	18	0	0	18	0	0	0
1236	0	0	0	0	0	0	0	0	0	72	0	0	0	0	0	0	0	0
1237	0	0	0	0	0	0	0	0	0	0	0	0	0	0	0	0	0	17
1238	0	0	0	0	71	0	0	0	0	0	0	0	0	0	0	0	0	0
1239	0	0	0	0	0	0	71	0	0	0	0	0	0	0	0	0	0	0
1240	0	0	0	0	0	0	0	0	71	0	0	0	0	0	0	0	0	0
1241	0	0	0	0	0	0	0	0	0	0	71	0	0	0	0	0	0	0
1242	0	0	0	0	0	0	0	0	0	0	71	0	0	0	0	0	0	0
1243	0	0	0	0	0	0	0	0	0	0	0	0	0	0	0	71	0	0
1244	0	0	70	0	0	0	0	0	0	0	0	0	0	0	0	0	0	0
1245	0	0	0	0	0	0	0	0	0	0	70	0	0	0	0	0	0	0
1246	0	0	0	0	0	0	0	0	0	0	70	0	0	0	0	0	0	0
1247	0	0	0	0	0	0	0	0	4	0	0	0	0	0	56	9	0	0
1248	0	0	0	0	0	0	0	0	0	18	0	0	0	0	0	0	0	0
1249	0	0	0	0	0	0	0	0	0	0	0	0	69	0	0	0	0	0
1250	0	0	0	0	0	0	0	0	0	0	0	0	0	69	0	0	0	0
1251	0	0	0	0	0	0	0	0	0	0	0	0	0	69	0	0	0	0
1252	0	68	0	0	0	0	0	0	0	0	0	0	0	0	0	0	0	0
1253	0	0	0	0	0	0	68	0	0	0	0	0	0	0	0	0	0	0
1254	0	0	0	0	0	0	0	0	0	0	68	0	0	0	0	0	0	0
1255	0	0	0	0	0	0	0	0	0	0	0	0	0	0	0	0	68	0
1256	0	67	0	0	0	0	0	0	0	0	0	0	0	0	0	0	0	0
1257	0	0	29	0	0	0	0	0	0	38	0	0	0	0	0	0	0	0
1258	0	0	0	0	0	0	67	0	0	0	0	0	0	0	0	0	0	0
1259	0	0	0	0	0	0	67	0	0	0	0	0	0	0	0	0	0	0
1260	0	0	0	0	0	0	67	0	0	0	0	0	0	0	0	0	0	0
1261	0	0	0	0	0	0	0	0	67	0	0	0	0	0	0	0	0	0
1262	0	0	0	0	0	0	0	0	7	8	7	7	7	3	0	0	4	5
1263	0	0	0	0	0	0	0	0	0	0	67	0	0	0	0	0	0	0
1264	0	0	0	0	0	0	0	0	0	0	67	0	0	0	0	0	0	0
1265	0	0	0	0	0	0	0	0	0	0	67	0	0	0	0	0	0	0
1266	0	0	0	0	0	0	0	0	0	0	0	0	67	0	0	0	0	0
1267	0	0	0	0	0	0	0	0	0	0	0	0	0	67	0	0	0	0
1269	66	0	0	0	0	0	0	0	0	0	0	0	0	0	0	0	0	0
1270	0	0	66	0	0	0	0	0	0	0	0	0	0	0	0	0	0	0
1271	0	0	0	0	0	0	0	66	0	0	0	0	0	0	0	0	0	0
1272	0	0	0	0	0	0	0	0	0	0	66	0	0	0	0	0	0	0
1273	0	0	0	0	0	0	0	0	0	0	0	23	0	0	0	0	21	0
1274	0	0	0	0	0	0	0	0	0	0	0	0	0	66	0	0	0	0
1276	0	65	0	0	0	0	0	0	0	0	0	0	0	0	0	0	0	0
1277	0	0	0	0	0	0	65	0	0	0	0	0	0	0	0	0	0	0
1278	0	0	0	0	0	0	0	0	0	0	0	65	0	0	0	0	0	0
1279	0	0	0	0	0	0	0	0	0	0	0	0	0	0	0	65	0	0
1280	0	0	0	13	0	0	0	0	0	0	0	0	0	0	0	0	0	0
1281	0	0	0	0	0	64	0	0	0	0	0	0	0	0	0	0	0	0
1282	0	0	0	0	0	0	0	0	0	0	0	0	0	0	64	0	0	0
1284	0	0	0	0	63	0	0	0	0	0	0	0	0	0	0	0	0	0
1285	0	0	0	0	0	0	63	0	0	0	0	0	0	0	0	0	0	0
1286	0	0	0	0	0	0	0	0	63	0	0	0	0	0	0	0	0	0
1287	0	0	0	0	0	0	0	0	0	0	0	0	0	0	0	0	63	0
1288	0	0	0	0	0	0	0	0	0	62	0	0	0	0	0	0	0	0
1289	0	0	0	0	0	0	0	0	0	0	0	62	0	0	0	0	0	0
1290	0	0	0	0	0	0	0	0	0	0	0	0	62	0	0	0	0	0
1291	0	0	0	0	0	0	0	0	0	0	0	0	62	0	0	0	0	0
1292	0	0	0	0	0	0	0	0	0	0	0	0	0	0	0	0	62	0
1293	0	0	0	0	0	0	0	0	0	61	0	0	0	0	0	0	0	0
1294	0	0	0	0	0	0	0	0	0	61	0	0	0	0	0	0	0	0
1295	0	0	0	0	0	0	0	0	0	0	0	0	0	0	61	0	0	0
1297	60	0	0	0	0	0	0	0	0	0	0	0	0	0	0	0	0	0
1298	0	0	60	0	0	0	0	0	0	0	0	0	0	0	0	0	0	0
1299	0	0	0	60	0	0	0	0	0	0	0	0	0	0	0	0	0	0
1300	0	0	0	0	60	0	0	0	0	0	0	0	0	0	0	0	0	0
1301	0	0	0	0	0	0	0	0	0	60	0	0	0	0	0	0	0	0
1303	0	0	0	0	0	0	0	0	0	0	0	0	0	0	0	0	60	0
1304	0	59	0	0	0	0	0	0	0	0	0	0	0	0	0	0	0	0
1305	0	0	59	0	0	0	0	0	0	0	0	0	0	0	0	0	0	0
1306	0	0	0	0	0	0	0	0	0	0	0	0	0	59	0	0	0	0
1308	0	0	0	0	0	0	0	0	0	0	0	0	0	0	0	0	0	59
1309	0	0	58	0	0	0	0	0	0	0	0	0	0	0	0	0	0	0
1311	0	0	0	0	0	0	0	0	0	0	0	0	0	0	0	0	0	58
1312	0	0	0	57	0	0	0	0	0	0	0	0	0	0	0	0	0	0
1313	0	0	0	0	0	0	0	0	0	57	0	0	0	0	0	0	0	0
1315	0	0	0	0	0	0	56	0	0	0	0	0	0	0	0	0	0	0
1316	0	0	0	0	0	0	0	0	56	0	0	0	0	0	0	0	0	0
1318	0	0	0	0	0	0	0	0	0	0	0	0	0	0	0	0	0	56
1319	0	0	0	0	0	0	0	0	0	0	0	0	0	0	0	0	0	56
1320	0	0	0	0	55	0	0	0	0	0	0	0	0	0	0	0	0	0
1321	0	0	0	0	0	0	55	0	0	0	0	0	0	0	0	0	0	0
1322	0	0	0	0	0	0	0	55	0	0	0	0	0	0	0	0	0	0
1323	0	0	0	0	0	0	0	0	55	0	0	0	0	0	0	0	0	0
1324	0	0	0	0	0	0	0	0	21	0	14	0	0	7	0	0	7	6
1325	0	0	0	0	0	0	0	0	0	0	0	0	0	55	0	0	0	0
1326	0	0	54	0	0	0	0	0	0	0	0	0	0	0	0	0	0	0
1327	0	0	22	0	0	0	0	0	0	0	0	0	0	0	0	22	0	0
1328	0	0	0	0	0	0	0	0	0	0	54	0	0	0	0	0	0	0
1329	0	0	0	0	0	0	0	0	0	0	0	0	0	0	54	0	0	0
1330	0	0	0	0	0	0	0	0	0	0	0	0	0	0	54	0	0	0
1331	0	0	0	0	0	0	0	0	0	0	0	0	0	0	0	0	0	54
1332	0	0	0	0	0	0	0	0	0	0	0	0	0	0	0	0	0	54
1333	0	0	53	0	0	0	0	0	0	0	0	0	0	0	0	0	0	0
1334	0	0	53	0	0	0	0	0	0	0	0	0	0	0	0	0	0	0
1335	0	0	0	0	0	0	0	0	0	0	0	0	0	53	0	0	0	0
1337	37	0	0	0	0	0	0	0	0	15	0	0	0	0	0	0	0	0
1338	0	0	52	0	0	0	0	0	0	0	0	0	0	0	0	0	0	0
1339	0	0	0	0	0	0	0	0	10	0	15	14	0	0	0	0	0	0
1341	0	2	0	0	0	0	0	0	0	0	0	0	32	0	0	17	0	0
1342	51	0	0	0	0	0	0	0	0	0	0	0	0	0	0	0	0	0
1343	51	0	0	0	0	0	0	0	0	0	0	0	0	0	0	0	0	0
1344	0	0	0	0	0	0	0	0	0	51	0	0	0	0	0	0	0	0
1345	0	0	0	0	0	0	0	0	0	0	0	0	0	51	0	0	0	0
1347	0	0	0	0	0	0	0	0	0	0	0	0	0	0	0	51	0	0
1348	0	0	0	0	0	0	0	0	0	0	0	0	0	0	0	51	0	0
1349	0	50	0	0	0	0	0	0	0	0	0	0	0	0	0	0	0	0
1350	27	0	0	0	0	0	0	0	0	23	0	0	0	0	0	0	0	0
1351	0	0	0	0	0	0	0	0	12	0	19	0	0	0	0	0	0	9
1352	0	0	0	0	0	0	0	0	0	16	0	0	0	0	0	12	9	13
1353	0	0	0	0	0	0	0	0	0	0	0	0	6	0	0	8	9	0
1354	0	0	0	0	0	0	0	0	0	0	0	0	0	0	50	0	0	0
1355	49	0	0	0	0	0	0	0	0	0	0	0	0	0	0	0	0	0
1356	0	0	0	49	0	0	0	0	0	0	0	0	0	0	0	0	0	0
1357	0	0	0	49	0	0	0	0	0	0	0	0	0	0	0	0	0	0
1358	0	0	0	0	49	0	0	0	0	0	0	0	0	0	0	0	0	0
1359	0	0	0	0	0	0	0	0	0	49	0	0	0	0	0	0	0	0
1360	0	0	0	0	0	0	0	0	0	49	0	0	0	0	0	0	0	0
1361	0	0	0	0	0	0	0	0	0	49	0	0	0	0	0	0	0	0
1364	0	0	0	0	0	0	0	0	0	0	0	0	0	0	0	49	0	0
1365	0	0	0	0	0	0	0	0	0	0	0	0	0	0	0	0	0	49
1366	0	0	13	0	0	0	0	0	0	0	12	0	0	0	0	23	0	0
1367	0	0	0	0	0	0	0	0	7	6	10	10	10	5	0	0	0	0
1369	0	0	0	0	0	0	0	0	0	0	0	0	0	0	0	48	0	0
1370	0	47	0	0	0	0	0	0	0	0	0	0	0	0	0	0	0	0
1371	0	0	47	0	0	0	0	0	0	0	0	0	0	0	0	0	0	0
1372	0	0	0	47	0	0	0	0	0	0	0	0	0	0	0	0	0	0
1373	0	0	0	0	0	0	0	0	0	0	0	24	0	23	0	0	0	0
1376	0	0	0	0	0	0	0	0	0	0	0	0	0	0	0	0	0	47
1377	0	46	0	0	0	0	0	0	0	0	0	0	0	0	0	0	0	0
1378	0	46	0	0	0	0	0	0	0	0	0	0	0	0	0	0	0	0
1379	46	0	0	0	0	0	0	0	0	0	0	0	0	0	0	0	0	0
1380	46	0	0	0	0	0	0	0	0	0	0	0	0	0	0	0	0	0
1381	0	0	0	0	0	0	0	0	0	0	0	0	0	0	46	0	0	0
1382	45	0	0	0	0	0	0	0	0	0	0	0	0	0	0	0	0	0
1383	45	0	0	0	0	0	0	0	0	0	0	0	0	0	0	0	0	0
1384	0	0	45	0	0	0	0	0	0	0	0	0	0	0	0	0	0	0
1385	0	0	45	0	0	0	0	0	0	0	0	0	0	0	0	0	0	0
1386	0	0	0	0	0	0	0	0	0	45	0	0	0	0	0	0	0	0
1387	0	0	0	0	0	0	0	0	0	0	10	0	0	0	0	0	0	0
1389	0	0	0	0	0	0	0	0	0	0	0	0	0	0	0	0	0	45
1390	0	44	0	0	0	0	0	0	0	0	0	0	0	0	0	0	0	0
1391	0	9	0	0	0	0	0	0	0	0	0	0	0	0	0	0	0	0
1392	0	0	0	0	0	0	0	0	0	23	0	0	13	0	0	0	0	0
1393	0	0	0	0	0	0	0	0	0	0	0	0	0	0	0	0	0	44
1394	0	0	0	0	43	0	0	0	0	0	0	0	0	0	0	0	0	0
1395	0	0	0	0	0	0	43	0	0	0	0	0	0	0	0	0	0	0
1396	0	0	0	0	0	0	0	0	0	0	43	0	0	0	0	0	0	0
1397	0	0	0	0	0	0	0	0	0	0	43	0	0	0	0	0	0	0
1398	0	0	0	0	0	0	0	0	0	0	0	43	0	0	0	0	0	0
1400	0	42	0	0	0	0	0	0	0	0	0	0	0	0	0	0	0	0
1401	0	42	0	0	0	0	0	0	0	0	0	0	0	0	0	0	0	0
1402	42	0	0	0	0	0	0	0	0	0	0	0	0	0	0	0	0	0
1403	0	0	42	0	0	0	0	0	0	0	0	0	0	0	0	0	0	0
1404	0	0	42	0	0	0	0	0	0	0	0	0	0	0	0	0	0	0
1405	0	0	0	0	0	0	0	0	0	42	0	0	0	0	0	0	0	0
1406	0	0	0	0	0	0	0	0	0	0	6	0	0	0	8	15	0	0
1407	0	0	0	0	0	0	0	0	0	0	0	0	0	42	0	0	0	0
1408	0	0	41	0	0	0	0	0	0	0	0	0	0	0	0	0	0	0
1409	0	0	41	0	0	0	0	0	0	0	0	0	0	0	0	0	0	0
1410	0	0	2	0	1	0	0	0	0	0	0	18	0	0	0	0	0	0
1411	0	0	0	0	0	0	0	41	0	0	0	0	0	0	0	0	0	0
1412	0	0	0	0	0	0	0	0	0	0	0	41	0	0	0	0	0	0
1415	0	40	0	0	0	0	0	0	0	0	0	0	0	0	0	0	0	0
1416	0	0	40	0	0	0	0	0	0	0	0	0	0	0	0	0	0	0
1417	0	0	13	0	0	0	16	0	0	0	0	0	0	0	0	0	0	0
1418	0	0	0	0	0	0	0	0	0	0	0	0	40	0	0	0	0	0
1419	0	0	0	0	0	0	0	0	0	0	0	0	0	0	0	0	0	40
1420	0	0	0	0	0	0	0	0	0	0	0	0	0	0	0	0	0	40
1421	39	0	0	0	0	0	0	0	0	0	0	0	0	0	0	0	0	0
1422	39	0	0	0	0	0	0	0	0	0	0	0	0	0	0	0	0	0
1423	0	0	0	39	0	0	0	0	0	0	0	0	0	0	0	0	0	0
1424	0	0	0	39	0	0	0	0	0	0	0	0	0	0	0	0	0	0
1425	0	0	0	0	0	39	0	0	0	0	0	0	0	0	0	0	0	0
1426	0	0	0	0	0	0	0	0	0	39	0	0	0	0	0	0	0	0
1427	0	0	0	0	0	0	0	0	0	39	0	0	0	0	0	0	0	0
1428	0	0	0	0	0	0	0	0	0	0	0	0	16	13	0	0	0	10
1430	0	0	0	0	0	0	0	0	0	0	0	0	0	0	0	0	39	0
1431	0	0	0	0	0	0	0	0	0	0	0	0	0	0	0	0	0	39
1432	0	38	0	0	0	0	0	0	0	0	0	0	0	0	0	0	0	0
1433	0	38	0	0	0	0	0	0	0	0	0	0	0	0	0	0	0	0
1434	38	0	0	0	0	0	0	0	0	0	0	0	0	0	0	0	0	0
1435	0	0	0	0	0	38	0	0	0	0	0	0	0	0	0	0	0	0
1436	0	0	0	0	0	0	0	38	0	0	0	0	0	0	0	0	0	0
1437	0	0	0	0	0	0	0	0	0	0	38	0	0	0	0	0	0	0
1438	0	0	0	0	0	0	0	0	0	0	0	38	0	0	0	0	0	0
1439	0	0	0	0	0	0	0	0	0	0	0	0	0	38	0	0	0	0
1441	0	0	0	0	0	0	0	0	0	0	0	0	0	0	0	0	38	0
1442	0	0	0	0	0	0	0	0	0	0	0	0	0	0	0	0	38	0
1443	20	0	0	0	0	0	0	0	0	0	0	0	0	0	0	0	0	0
1444	0	0	0	0	0	37	0	0	0	0	0	0	0	0	0	0	0	0
1445	0	0	0	0	0	0	37	0	0	0	0	0	0	0	0	0	0	0
1446	0	0	0	0	0	0	0	0	0	0	37	0	0	0	0	0	0	0
1448	0	0	0	0	0	0	0	0	0	0	0	0	0	0	0	0	8	21
1449	0	36	0	0	0	0	0	0	0	0	0	0	0	0	0	0	0	0
1450	36	0	0	0	0	0	0	0	0	0	0	0	0	0	0	0	0	0
1451	36	0	0	0	0	0	0	0	0	0	0	0	0	0	0	0	0	0
1452	0	0	0	36	0	0	0	0	0	0	0	0	0	0	0	0	0	0
1453	0	0	0	0	0	0	0	0	0	36	0	0	0	0	0	0	0	0
1454	0	0	0	0	0	0	0	0	0	0	0	36	0	0	0	0	0	0
1455	0	0	0	0	0	0	0	0	0	0	0	36	0	0	0	0	0	0
1459	0	0	0	0	0	0	0	0	0	0	0	0	0	0	0	0	0	36
1460	0	0	35	0	0	0	0	0	0	0	0	0	0	0	0	0	0	0
1461	0	0	35	0	0	0	0	0	0	0	0	0	0	0	0	0	0	0
1462	0	0	35	0	0	0	0	0	0	0	0	0	0	0	0	0	0	0
1463	0	0	0	5	0	0	0	0	6	0	0	0	0	3	0	0	7	0
1464	0	0	0	0	35	0	0	0	0	0	0	0	0	0	0	0	0	0
1465	0	0	0	0	0	0	0	0	0	0	0	0	0	35	0	0	0	0
1466	0	0	34	0	0	0	0	0	0	0	0	0	0	0	0	0	0	0
1467	0	0	0	0	34	0	0	0	0	0	0	0	0	0	0	0	0	0
1468	0	0	0	0	3	0	0	0	0	15	0	0	0	0	0	0	8	8
1469	0	0	0	0	0	0	0	0	34	0	0	0	0	0	0	0	0	0
1470	0	0	0	0	0	0	0	0	17	0	0	0	0	0	0	0	0	0
1471	0	0	0	0	0	0	0	0	0	34	0	0	0	0	0	0	0	0
1472	0	0	0	0	0	0	0	0	0	0	34	0	0	0	0	0	0	0
1473	0	0	0	0	0	0	0	0	0	0	0	0	34	0	0	0	0	0
1474	0	0	0	0	0	0	0	0	0	0	0	0	0	34	0	0	0	0
1475	0	0	33	0	0	0	0	0	0	0	0	0	0	0	0	0	0	0
1476	0	0	0	33	0	0	0	0	0	0	0	0	0	0	0	0	0	0
1477	0	0	0	0	0	0	33	0	0	0	0	0	0	0	0	0	0	0
1478	0	0	0	0	0	0	0	0	8	0	6	0	10	0	0	0	0	0
1479	0	0	0	0	0	0	0	0	0	0	33	0	0	0	0	0	0	0
1480	0	0	0	0	0	0	0	0	0	0	0	0	0	0	0	0	0	33
1481	0	32	0	0	0	0	0	0	0	0	0	0	0	0	0	0	0	0
1482	0	0	0	0	0	0	0	32	0	0	0	0	0	0	0	0	0	0
1483	0	0	0	0	0	0	0	0	0	9	0	0	0	0	0	0	0	0
1484	0	0	0	0	0	0	0	0	0	0	0	0	0	32	0	0	0	0
1485	0	0	0	0	0	0	0	0	0	0	0	0	0	32	0	0	0	0
1487	0	0	0	0	0	0	0	0	0	0	0	0	0	0	0	32	0	0
1488	0	0	0	0	0	0	0	0	0	0	0	0	0	0	0	0	0	32
1489	0	0	0	31	0	0	0	0	0	0	0	0	0	0	0	0	0	0
1490	0	0	0	31	0	0	0	0	0	0	0	0	0	0	0	0	0	0
1491	0	0	0	0	0	0	0	0	0	0	0	0	31	0	0	0	0	0
1492	0	0	0	0	0	0	0	0	0	0	0	0	0	31	0	0	0	0
1493	0	0	0	0	0	0	0	0	0	0	0	0	0	0	31	0	0	0
1494	0	0	0	0	0	0	0	0	0	0	0	0	0	0	0	31	0	0
1495	0	0	0	0	0	0	0	0	0	0	0	0	0	0	0	31	0	0
1496	0	0	0	0	0	0	0	0	0	0	0	0	0	0	0	0	31	0
1497	0	0	0	0	0	0	0	0	0	0	0	0	0	0	0	0	0	31
1498	0	0	0	0	0	30	0	0	0	0	0	0	0	0	0	0	0	0
1499	0	29	0	0	0	0	0	0	0	0	0	0	0	0	0	0	0	0
1500	29	0	0	0	0	0	0	0	0	0	0	0	0	0	0	0	0	0
1501	29	0	0	0	0	0	0	0	0	0	0	0	0	0	0	0	0	0
1502	0	0	0	0	4	0	0	0	0	0	2	0	0	5	0	0	9	6
1503	0	0	0	0	0	29	0	0	0	0	0	0	0	0	0	0	0	0
1504	0	0	0	0	0	0	0	0	0	29	0	0	0	0	0	0	0	0
1505	0	0	0	0	0	0	0	0	0	0	0	0	14	0	0	0	0	15
1506	0	0	28	0	0	0	0	0	0	0	0	0	0	0	0	0	0	0
1507	0	0	0	28	0	0	0	0	0	0	0	0	0	0	0	0	0	0
1508	0	0	0	28	0	0	0	0	0	0	0	0	0	0	0	0	0	0
1509	0	0	0	8	0	0	0	0	0	0	0	0	0	0	0	0	9	0
1510	0	0	0	0	28	0	0	0	0	0	0	0	0	0	0	0	0	0
1511	0	0	0	0	0	0	0	0	0	0	0	0	0	28	0	0	0	0
1512	0	0	0	0	0	0	0	0	0	0	0	0	0	28	0	0	0	0
1513	0	0	0	0	0	0	0	0	0	0	0	0	0	28	0	0	0	0
1514	0	0	0	0	0	0	0	0	0	0	0	0	0	0	0	28	0	0
1515	0	0	0	0	0	0	0	0	0	0	0	0	0	0	0	0	28	0
1516	0	0	0	0	27	0	0	0	0	0	0	0	0	0	0	0	0	0
1517	0	0	0	0	0	0	0	0	23	0	0	0	0	0	0	0	0	0
1518	0	0	0	0	0	0	0	0	12	0	0	0	0	0	0	0	0	0
1519	0	0	0	0	0	0	0	0	0	0	27	0	0	0	0	0	0	0
1522	0	0	0	0	0	0	0	0	0	0	0	0	0	0	0	27	0	0
1523	0	0	0	0	0	0	0	0	0	0	0	0	0	0	0	27	0	0
1524	0	0	0	0	0	0	0	0	0	0	0	0	0	0	0	0	0	27
1525	26	0	0	0	0	0	0	0	0	0	0	0	0	0	0	0	0	0
1526	0	0	0	0	0	0	26	0	0	0	0	0	0	0	0	0	0	0
1527	0	0	0	0	0	0	0	26	0	0	0	0	0	0	0	0	0	0
1528	0	0	0	0	0	0	0	0	0	19	7	0	0	0	0	0	0	0
1529	0	0	0	0	0	0	0	0	0	0	6	0	0	0	0	0	7	0
1530	0	0	0	0	0	0	0	0	0	0	0	0	11	0	15	0	0	0
1531	0	0	0	0	0	0	0	0	0	0	0	0	0	0	26	0	0	0
1532	0	0	0	0	0	0	0	0	0	0	0	0	0	0	26	0	0	0
1535	0	0	0	0	0	0	0	0	0	0	0	0	0	0	0	0	26	0
1536	0	0	0	0	0	0	0	0	0	0	0	0	0	0	0	0	0	26
1537	0	0	0	0	0	0	0	0	0	0	0	0	0	0	0	0	0	26
1538	0	25	0	0	0	0	0	0	0	0	0	0	0	0	0	0	0	0
1539	0	25	0	0	0	0	0	0	0	0	0	0	0	0	0	0	0	0
1540	0	0	25	0	0	0	0	0	0	0	0	0	0	0	0	0	0	0
1541	0	0	7	0	0	0	0	0	0	0	7	0	0	0	0	7	0	0
1542	0	0	0	0	0	0	0	0	0	0	0	0	0	25	0	0	0	0
1543	0	0	0	24	0	0	0	0	0	0	0	0	0	0	0	0	0	0
1544	0	0	0	24	0	0	0	0	0	0	0	0	0	0	0	0	0	0
1545	0	0	0	0	0	0	24	0	0	0	0	0	0	0	0	0	0	0
1546	0	0	0	0	0	0	0	24	0	0	0	0	0	0	0	0	0	0
1547	0	0	0	0	0	0	0	4	7	7	6	0	0	0	0	0	0	0
1548	0	0	0	0	0	0	0	0	0	0	0	24	0	0	0	0	0	0
1550	0	0	0	0	0	0	0	0	0	0	0	0	0	0	0	24	0	0
1551	23	0	0	0	0	0	0	0	0	0	0	0	0	0	0	0	0	0
1552	3	0	0	0	0	0	0	0	0	0	0	0	0	0	14	0	0	0
1553	0	0	23	0	0	0	0	0	0	0	0	0	0	0	0	0	0	0
1554	0	0	0	23	0	0	0	0	0	0	0	0	0	0	0	0	0	0
1555	0	0	0	0	0	0	0	23	0	0	0	0	0	0	0	0	0	0
1556	0	0	0	0	0	0	0	23	0	0	0	0	0	0	0	0	0	0
1557	0	0	0	0	0	0	0	0	0	23	0	0	0	0	0	0	0	0
1558	0	0	0	0	0	0	0	0	0	0	23	0	0	0	0	0	0	0
1559	0	0	0	0	0	0	0	0	0	0	9	0	0	3	0	3	0	8
1560	0	0	0	0	0	0	0	0	0	0	0	0	0	23	0	0	0	0
1561	0	0	0	0	0	0	0	0	0	0	0	0	0	23	0	0	0	0
1563	0	0	0	0	0	0	0	0	0	0	0	0	0	0	0	23	0	0
1564	0	0	0	0	0	0	0	0	0	0	0	0	0	0	0	0	12	11
1565	0	3	5	0	0	5	3	6	0	0	0	0	0	0	0	0	0	0
1566	22	0	0	0	0	0	0	0	0	0	0	0	0	0	0	0	0	0
1567	0	0	0	22	0	0	0	0	0	0	0	0	0	0	0	0	0	0
1568	0	0	0	0	0	0	0	0	0	0	0	22	0	0	0	0	0	0
1569	0	0	0	0	0	0	0	0	0	0	0	0	22	0	0	0	0	0
1570	0	0	0	0	0	0	0	0	0	0	0	0	0	22	0	0	0	0
1573	0	0	0	0	0	0	0	0	0	0	0	0	0	0	0	22	0	0
1574	0	0	0	0	21	0	0	0	0	0	0	0	0	0	0	0	0	0
1575	0	0	0	0	0	0	0	0	0	21	0	0	0	0	0	0	0	0
1576	0	0	0	0	0	0	0	0	0	21	0	0	0	0	0	0	0	0
1578	0	0	0	0	0	0	0	0	0	0	0	0	0	0	0	21	0	0
1579	0	0	0	20	0	0	0	0	0	0	0	0	0	0	0	0	0	0
1580	0	0	0	0	20	0	0	0	0	0	0	0	0	0	0	0	0	0
1581	0	0	0	0	0	0	0	20	0	0	0	0	0	0	0	0	0	0
1582	0	0	0	0	0	0	0	0	8	0	0	0	0	0	0	3	0	0
1583	0	0	0	0	0	0	0	0	7	0	6	0	0	0	0	7	0	0
1584	0	0	0	0	0	0	0	0	0	20	0	0	0	0	0	0	0	0
1585	0	0	0	0	0	0	0	0	0	20	0	0	0	0	0	0	0	0
1586	0	0	0	0	0	0	0	0	0	0	20	0	0	0	0	0	0	0
1587	0	0	0	0	0	0	0	0	0	0	0	0	0	20	0	0	0	0
1591	7	2	0	0	0	0	0	0	0	0	0	0	10	0	0	0	0	0
1592	0	0	19	0	0	0	0	0	0	0	0	0	0	0	0	0	0	0
1593	0	0	0	0	19	0	0	0	0	0	0	0	0	0	0	0	0	0
1594	0	0	0	0	0	0	0	0	13	0	0	0	0	6	0	0	0	0
1595	0	0	0	0	0	0	0	0	9	4	0	0	0	6	0	0	0	0
1596	0	0	0	0	0	0	0	0	0	0	19	0	0	0	0	0	0	0
1598	0	0	0	0	0	0	0	0	0	0	0	0	0	0	0	19	0	0
1599	0	0	0	0	0	0	0	0	0	0	0	0	0	0	0	19	0	0
1600	0	4	0	0	0	0	0	0	9	5	0	0	0	0	0	0	0	0
1601	0	0	10	0	0	0	0	8	0	0	0	0	0	0	0	0	0	0
1602	0	0	0	0	0	0	0	0	18	0	0	0	0	0	0	0	0	0
1603	0	0	0	0	0	0	0	0	0	0	0	0	0	0	0	0	18	0
1604	4	0	4	0	0	0	0	0	0	4	5	0	0	0	0	0	0	0
1605	0	0	9	0	8	0	0	0	0	0	0	0	0	0	0	0	0	0
1606	0	0	0	17	0	0	0	0	0	0	0	0	0	0	0	0	0	0
1607	0	0	0	0	0	0	0	0	17	0	0	0	0	0	0	0	0	0
1608	0	0	0	0	0	0	0	0	3	2	0	0	0	9	0	0	3	0
1609	0	0	0	0	0	0	0	0	0	6	0	0	0	0	0	0	0	0
1610	0	0	0	0	0	0	0	0	0	4	0	0	3	0	5	0	0	0
1611	0	0	0	0	0	0	0	0	0	0	17	0	0	0	0	0	0	0
1612	0	0	0	0	0	0	0	0	0	0	0	0	17	0	0	0	0	0
1613	0	0	0	0	0	0	0	0	0	0	0	0	7	0	0	0	0	0
1615	0	0	0	0	0	0	0	0	0	0	0	0	0	0	0	0	17	0
1616	0	0	0	0	0	0	0	0	0	0	0	0	0	0	0	0	17	0
1617	16	0	0	0	0	0	0	0	0	0	0	0	0	0	0	0	0	0
1618	0	0	5	0	0	0	0	0	0	11	0	0	0	0	0	0	0	0
1619	0	0	0	16	0	0	0	0	0	0	0	0	0	0	0	0	0	0
1620	0	0	0	0	0	7	0	0	0	0	0	0	0	0	0	0	0	0
1621	0	0	0	0	0	0	0	2	0	0	0	0	0	5	0	0	0	6
1622	0	0	0	0	0	0	0	0	0	0	0	0	0	16	0	0	0	0
1623	0	0	0	0	0	0	0	0	0	0	0	0	0	16	0	0	0	0
1624	0	0	0	0	0	0	0	0	0	0	0	0	0	16	0	0	0	0
1627	0	0	0	0	0	0	0	0	0	0	0	0	0	0	0	16	0	0
1628	0	0	0	0	0	0	0	0	0	0	0	0	0	0	0	16	0	0
1629	0	0	0	0	0	0	0	0	0	0	0	0	0	0	0	16	0	0
1630	0	0	0	0	0	0	0	0	0	0	0	0	0	0	0	11	0	5
1631	4	0	0	0	0	0	0	0	6	0	0	0	5	0	0	0	0	0
1632	0	0	15	0	0	0	0	0	0	0	0	0	0	0	0	0	0	0
1633	0	0	0	0	0	15	0	0	0	0	0	0	0	0	0	0	0	0
1634	0	0	0	0	0	0	0	0	0	0	15	0	0	0	0	0	0	0
1635	0	0	0	0	0	0	0	0	0	0	0	15	0	0	0	0	0	0
1636	0	0	0	0	0	0	0	0	0	0	0	0	0	15	0	0	0	0
1642	0	0	0	0	0	0	0	0	0	0	0	0	0	0	0	2	0	5
1643	0	0	0	0	0	0	0	0	0	0	0	0	0	0	0	15	0	0
1644	0	0	0	0	0	0	0	0	0	0	0	0	0	0	0	15	0	0
1645	0	0	0	0	0	0	0	0	0	0	0	0	0	0	0	15	0	0
1646	0	14	0	0	0	0	0	0	0	0	0	0	0	0	0	0	0	0
1647	14	0	0	0	0	0	0	0	0	0	0	0	0	0	0	0	0	0
1648	0	0	0	0	14	0	0	0	0	0	0	0	0	0	0	0	0	0
1649	0	0	0	0	0	0	0	5	0	0	9	0	0	0	0	0	0	0
1650	0	0	0	0	0	0	0	0	14	0	0	0	0	0	0	0	0	0
1651	0	0	0	0	0	0	0	0	0	14	0	0	0	0	0	0	0	0
1652	0	0	0	0	0	0	0	0	0	0	0	14	0	0	0	0	0	0
1653	0	0	0	0	0	0	0	0	0	0	0	0	0	0	14	0	0	0
1656	0	0	0	0	0	0	0	0	0	0	0	0	0	0	0	0	14	0
1657	13	0	0	0	0	0	0	0	0	0	0	0	0	0	0	0	0	0
1658	13	0	0	0	0	0	0	0	0	0	0	0	0	0	0	0	0	0
1659	0	0	0	5	0	0	0	0	0	0	0	0	0	0	0	0	8	0
1660	0	0	0	0	13	0	0	0	0	0	0	0	0	0	0	0	0	0
1661	0	0	0	0	0	13	0	0	0	0	0	0	0	0	0	0	0	0
1662	0	0	0	0	0	0	13	0	0	0	0	0	0	0	0	0	0	0
1663	0	0	0	0	0	0	0	13	0	0	0	0	0	0	0	0	0	0
1664	0	0	0	0	0	0	0	0	0	13	0	0	0	0	0	0	0	0
1665	0	0	0	0	0	0	0	0	0	0	0	0	13	0	0	0	0	0
1666	0	0	0	0	0	0	0	0	0	0	0	0	0	0	13	0	0	0
1670	0	0	0	0	0	0	0	0	0	0	0	0	0	0	0	13	0	0
1671	12	0	0	0	0	0	0	0	0	0	0	0	0	0	0	0	0	0
1672	6	0	0	0	0	0	0	0	6	0	0	0	0	0	0	0	0	0
1673	0	0	12	0	0	0	0	0	0	0	0	0	0	0	0	0	0	0
1674	0	0	4	4	0	4	0	0	0	0	0	0	0	0	0	0	0	0
1675	0	0	0	12	0	0	0	0	0	0	0	0	0	0	0	0	0	0
1676	0	0	0	0	0	0	0	0	12	0	0	0	0	0	0	0	0	0
1677	0	0	0	0	0	0	0	0	0	0	0	12	0	0	0	0	0	0
1678	0	0	0	0	0	0	0	0	0	0	0	0	12	0	0	0	0	0
1679	0	0	0	0	0	0	0	0	0	0	0	0	0	12	0	0	0	0
1680	0	0	0	0	0	0	0	0	0	0	0	0	0	12	0	0	0	0
1681	0	0	0	0	0	0	0	0	0	0	0	0	0	12	0	0	0	0
1686	0	0	0	0	0	0	0	0	0	0	0	0	0	0	0	0	12	0
1687	0	0	0	0	0	0	0	0	0	0	0	0	0	0	0	0	0	12
1688	0	11	0	0	0	0	0	0	0	0	0	0	0	0	0	0	0	0
1689	0	11	0	0	0	0	0	0	0	0	0	0	0	0	0	0	0	0
1690	0	7	0	0	0	0	0	0	0	0	0	0	0	0	0	0	4	0
1691	0	0	11	0	0	0	0	0	0	0	0	0	0	0	0	0	0	0
1692	0	0	0	0	0	0	11	0	0	0	0	0	0	0	0	0	0	0
1693	0	0	0	0	0	0	11	0	0	0	0	0	0	0	0	0	0	0
1694	0	0	0	0	0	0	0	11	0	0	0	0	0	0	0	0	0	0
1695	0	0	0	0	0	0	0	0	11	0	0	0	0	0	0	0	0	0
1696	0	0	0	0	0	0	0	0	0	11	0	0	0	0	0	0	0	0
1697	0	0	0	0	0	0	0	0	0	11	0	0	0	0	0	0	0	0
1698	0	0	0	0	0	0	0	0	0	0	11	0	0	0	0	0	0	0
1699	0	0	0	0	0	0	0	0	0	0	0	11	0	0	0	0	0	0
1700	0	0	0	0	0	0	0	0	0	0	0	0	11	0	0	0	0	0
1701	0	0	0	0	0	0	0	0	0	0	0	0	11	0	0	0	0	0
1705	0	0	0	0	0	0	0	0	0	0	0	0	0	0	0	11	0	0
1706	0	0	0	0	0	0	0	0	0	0	0	0	0	0	0	11	0	0
1707	0	0	0	0	0	0	0	0	0	0	0	0	0	0	0	0	11	0
1708	0	0	0	0	0	0	0	0	0	0	0	0	0	0	0	0	11	0
1709	0	10	0	0	0	0	0	0	0	0	0	0	0	0	0	0	0	0
1710	10	0	0	0	0	0	0	0	0	0	0	0	0	0	0	0	0	0
1711	3	0	0	0	0	0	0	0	0	0	7	0	0	0	0	0	0	0
1712	0	0	10	0	0	0	0	0	0	0	0	0	0	0	0	0	0	0
1713	0	0	6	4	0	0	0	0	0	0	0	0	0	0	0	0	0	0
1714	0	0	0	0	10	0	0	0	0	0	0	0	0	0	0	0	0	0
1715	0	0	0	0	0	0	0	10	0	0	0	0	0	0	0	0	0	0
1716	0	0	0	0	0	0	0	0	10	0	0	0	0	0	0	0	0	0
1717	0	0	0	0	0	0	0	0	8	0	0	0	0	0	0	0	2	0
1718	0	0	0	0	0	0	0	0	0	10	0	0	0	0	0	0	0	0
1719	0	0	0	0	0	0	0	0	0	5	0	0	0	5	0	0	0	0
1720	0	0	0	0	0	0	0	0	0	0	0	0	10	0	0	0	0	0
1722	0	0	0	0	0	0	0	0	0	0	0	0	0	0	0	0	10	0
1723	9	0	0	0	0	0	0	0	0	0	0	0	0	0	0	0	0	0
1724	9	0	0	0	0	0	0	0	0	0	0	0	0	0	0	0	0	0
1725	0	0	0	9	0	0	0	0	0	0	0	0	0	0	0	0	0	0
1726	0	0	0	9	0	0	0	0	0	0	0	0	0	0	0	0	0	0
1727	0	0	0	0	0	0	9	0	0	0	0	0	0	0	0	0	0	0
1728	0	0	0	0	0	0	0	9	0	0	0	0	0	0	0	0	0	0
1729	0	0	0	0	0	0	0	0	9	0	0	0	0	0	0	0	0	0
1730	0	0	0	0	0	0	0	0	9	0	0	0	0	0	0	0	0	0
1731	0	0	0	0	0	0	0	0	9	0	0	0	0	0	0	0	0	0
1732	0	0	0	0	0	0	0	0	0	0	9	0	0	0	0	0	0	0
1733	0	0	0	0	0	0	0	0	0	0	2	0	0	0	0	3	0	0
1734	0	0	0	0	0	0	0	0	0	0	0	9	0	0	0	0	0	0
1735	0	0	0	0	0	0	0	0	0	0	0	9	0	0	0	0	0	0
1736	0	0	0	0	0	0	0	0	0	0	0	0	0	9	0	0	0	0
1737	0	0	0	0	0	0	0	0	0	0	0	0	0	0	9	0	0	0
1740	0	0	0	0	0	0	0	0	0	0	0	0	0	0	0	0	0	4
1741	0	0	0	0	0	0	0	0	0	0	0	0	0	0	0	0	9	0
1742	0	0	0	0	0	0	0	0	0	0	0	0	0	0	0	0	9	0
1743	0	0	0	0	0	0	0	0	0	0	0	0	0	0	0	0	0	9
1744	0	0	0	0	0	0	0	0	0	0	0	0	0	0	0	0	0	9
1745	8	0	0	0	0	0	0	0	0	0	0	0	0	0	0	0	0	0
1746	8	0	0	0	0	0	0	0	0	0	0	0	0	0	0	0	0	0
1747	0	0	0	8	0	0	0	0	0	0	0	0	0	0	0	0	0	0
1748	0	0	0	0	8	0	0	0	0	0	0	0	0	0	0	0	0	0
1749	0	0	0	0	0	8	0	0	0	0	0	0	0	0	0	0	0	0
1750	0	0	0	0	0	0	8	0	0	0	0	0	0	0	0	0	0	0
1751	0	0	0	0	0	0	8	0	0	0	0	0	0	0	0	0	0	0
1752	0	0	0	0	0	0	0	0	8	0	0	0	0	0	0	0	0	0
1753	0	0	0	0	0	0	0	0	0	8	0	0	0	0	0	0	0	0
1754	0	0	0	0	0	0	0	0	0	4	0	0	0	4	0	0	0	0
1755	0	0	0	0	0	0	0	0	0	0	0	8	0	0	0	0	0	0
1756	0	0	0	0	0	0	0	0	0	0	0	0	8	0	0	0	0	0
1757	0	0	0	0	0	0	0	0	0	0	0	0	0	8	0	0	0	0
1762	0	0	0	0	0	0	0	0	0	0	0	0	0	0	0	8	0	0
1763	0	7	0	0	0	0	0	0	0	0	0	0	0	0	0	0	0	0
1764	3	0	0	0	0	0	0	0	0	0	0	0	0	0	0	0	0	4
1765	0	0	7	0	0	0	0	0	0	0	0	0	0	0	0	0	0	0
1766	0	0	0	0	7	0	0	0	0	0	0	0	0	0	0	0	0	0
1767	0	0	0	0	0	7	0	0	0	0	0	0	0	0	0	0	0	0
1768	0	0	0	0	0	0	0	0	7	0	0	0	0	0	0	0	0	0
1769	0	0	0	0	0	0	0	0	7	0	0	0	0	0	0	0	0	0
1770	0	0	0	0	0	0	0	0	0	7	0	0	0	0	0	0	0	0
1771	0	0	0	0	0	0	0	0	0	7	0	0	0	0	0	0	0	0
1772	0	0	0	0	0	0	0	0	0	7	0	0	0	0	0	0	0	0
1773	0	0	0	0	0	0	0	0	0	3	0	0	4	0	0	0	0	0
1774	0	0	0	0	0	0	0	0	0	0	7	0	0	0	0	0	0	0
1775	0	0	0	0	0	0	0	0	0	0	0	7	0	0	0	0	0	0
1776	0	0	0	0	0	0	0	0	0	0	0	0	7	0	0	0	0	0
1782	0	0	0	0	0	0	0	0	0	0	0	0	0	0	0	7	0	0
1783	0	0	0	0	0	0	0	0	0	0	0	0	0	0	0	0	7	0
1784	0	0	0	0	0	0	0	0	0	0	0	0	0	0	0	0	7	0
1785	0	0	0	0	0	0	0	0	0	0	0	0	0	0	0	0	0	7
1786	0	0	6	0	0	0	0	0	0	0	0	0	0	0	0	0	0	0
1787	0	0	0	6	0	0	0	0	0	0	0	0	0	0	0	0	0	0
1788	0	0	0	6	0	0	0	0	0	0	0	0	0	0	0	0	0	0
1789	0	0	0	0	6	0	0	0	0	0	0	0	0	0	0	0	0	0
1790	0	0	0	0	6	0	0	0	0	0	0	0	0	0	0	0	0	0
1791	0	0	0	0	0	6	0	0	0	0	0	0	0	0	0	0	0	0
1792	0	0	0	0	0	0	6	0	0	0	0	0	0	0	0	0	0	0
1793	0	0	0	0	0	0	0	0	6	0	0	0	0	0	0	0	0	0
1794	0	0	0	0	0	0	0	0	0	6	0	0	0	0	0	0	0	0
1795	0	0	0	0	0	0	0	0	0	6	0	0	0	0	0	0	0	0
1796	0	0	0	0	0	0	0	0	0	0	6	0	0	0	0	0	0	0
1797	0	0	0	0	0	0	0	0	0	0	6	0	0	0	0	0	0	0
1798	0	0	0	0	0	0	0	0	0	0	3	0	0	0	0	3	0	0
1799	0	0	0	0	0	0	0	0	0	0	0	6	0	0	0	0	0	0
1800	0	0	0	0	0	0	0	0	0	0	0	0	6	0	0	0	0	0
1801	0	0	0	0	0	0	0	0	0	0	0	0	0	6	0	0	0	0
1802	0	0	0	0	0	0	0	0	0	0	0	0	0	0	6	0	0	0
1803	0	0	0	0	0	0	0	0	0	0	0	0	0	0	6	0	0	0
1807	0	0	0	0	0	0	0	0	0	0	0	0	0	0	0	3	0	0
1808	0	0	0	0	0	0	0	0	0	0	0	0	0	0	0	0	0	6
1809	0	0	0	0	0	0	0	0	0	0	0	0	0	0	0	0	0	6
1810	0	0	0	0	0	0	0	0	0	0	0	0	0	0	0	0	0	6
1811	0	0	0	0	0	0	0	0	0	0	0	0	0	0	0	0	0	6
1812	0	5	0	0	0	0	0	0	0	0	0	0	0	0	0	0	0	0
1813	0	5	0	0	0	0	0	0	0	0	0	0	0	0	0	0	0	0
1814	0	0	5	0	0	0	0	0	0	0	0	0	0	0	0	0	0	0
1815	0	0	0	5	0	0	0	0	0	0	0	0	0	0	0	0	0	0
1816	0	0	0	0	5	0	0	0	0	0	0	0	0	0	0	0	0	0
1817	0	0	0	0	5	0	0	0	0	0	0	0	0	0	0	0	0	0
1818	0	0	0	0	0	2	0	0	0	0	0	0	0	0	0	0	3	0
1819	0	0	0	0	0	0	0	0	5	0	0	0	0	0	0	0	0	0
1820	0	0	0	0	0	0	0	0	2	0	0	0	0	0	3	0	0	0
1821	0	0	0	0	0	0	0	0	0	5	0	0	0	0	0	0	0	0
1822	0	0	0	0	0	0	0	0	0	5	0	0	0	0	0	0	0	0
1823	0	0	0	0	0	0	0	0	0	0	5	0	0	0	0	0	0	0
1824	0	0	0	0	0	0	0	0	0	0	0	0	5	0	0	0	0	0
1825	0	0	0	0	0	0	0	0	0	0	0	0	5	0	0	0	0	0
1826	0	0	0	0	0	0	0	0	0	0	0	0	0	5	0	0	0	0
1827	0	0	0	0	0	0	0	0	0	0	0	0	0	0	3	0	0	0
1828	0	0	0	0	0	0	0	0	0	0	0	0	0	0	2	0	3	0
1833	0	0	0	0	0	0	0	0	0	0	0	0	0	0	0	5	0	0
1834	0	0	0	0	0	0	0	0	0	0	0	0	0	0	0	0	5	0
1835	0	0	0	0	0	0	0	0	0	0	0	0	0	0	0	0	5	0
1836	0	0	0	0	0	0	0	0	0	0	0	0	0	0	0	0	5	0
1837	0	0	0	0	0	0	0	0	0	0	0	0	0	0	0	0	0	5
1838	0	0	0	0	0	0	0	0	0	0	0	0	0	0	0	0	0	5
1839	0	4	0	0	0	0	0	0	0	0	0	0	0	0	0	0	0	0
1840	0	4	0	0	0	0	0	0	0	0	0	0	0	0	0	0	0	0
1841	0	4	0	0	0	0	0	0	0	0	0	0	0	0	0	0	0	0
1842	0	4	0	0	0	0	0	0	0	0	0	0	0	0	0	0	0	0
1843	0	0	0	4	0	0	0	0	0	0	0	0	0	0	0	0	0	0
1844	0	0	0	4	0	0	0	0	0	0	0	0	0	0	0	0	0	0
1845	0	0	0	4	0	0	0	0	0	0	0	0	0	0	0	0	0	0
1846	0	0	0	0	4	0	0	0	0	0	0	0	0	0	0	0	0	0
1847	0	0	0	0	0	4	0	0	0	0	0	0	0	0	0	0	0	0
1848	0	0	0	0	0	0	0	0	4	0	0	0	0	0	0	0	0	0
1849	0	0	0	0	0	0	0	0	4	0	0	0	0	0	0	0	0	0
1850	0	0	0	0	0	0	0	0	4	0	0	0	0	0	0	0	0	0
1851	0	0	0	0	0	0	0	0	0	4	0	0	0	0	0	0	0	0
1852	0	0	0	0	0	0	0	0	0	0	0	0	4	0	0	0	0	0
1853	0	0	0	0	0	0	0	0	0	0	0	0	4	0	0	0	0	0
1854	0	0	0	0	0	0	0	0	0	0	0	0	4	0	0	0	0	0
1855	0	0	0	0	0	0	0	0	0	0	0	0	0	4	0	0	0	0
1856	0	0	0	0	0	0	0	0	0	0	0	0	0	4	0	0	0	0
1857	0	0	0	0	0	0	0	0	0	0	0	0	0	0	4	0	0	0
1863	0	0	0	0	0	0	0	0	0	0	0	0	0	0	0	4	0	0
1864	0	0	0	0	0	0	0	0	0	0	0	0	0	0	0	4	0	0
1865	0	0	0	0	0	0	0	0	0	0	0	0	0	0	0	4	0	0
1866	0	0	0	0	0	0	0	0	0	0	0	0	0	0	0	0	0	4
1867	0	0	0	0	0	0	0	0	0	0	0	0	0	0	0	0	0	4
1868	0	0	0	0	0	0	0	0	0	0	0	0	0	0	0	0	0	4
1869	0	0	0	0	0	0	0	0	0	0	0	0	0	0	0	0	0	4
1870	0	3	0	0	0	0	0	0	0	0	0	0	0	0	0	0	0	0
1871	0	3	0	0	0	0	0	0	0	0	0	0	0	0	0	0	0	0
1872	0	3	0	0	0	0	0	0	0	0	0	0	0	0	0	0	0	0
1873	0	3	0	0	0	0	0	0	0	0	0	0	0	0	0	0	0	0
1874	3	0	0	0	0	0	0	0	0	0	0	0	0	0	0	0	0	0
1875	3	0	0	0	0	0	0	0	0	0	0	0	0	0	0	0	0	0
1876	0	0	3	0	0	0	0	0	0	0	0	0	0	0	0	0	0	0
1877	0	0	0	3	0	0	0	0	0	0	0	0	0	0	0	0	0	0
1878	0	0	0	3	0	0	0	0	0	0	0	0	0	0	0	0	0	0
1879	0	0	0	0	0	0	3	0	0	0	0	0	0	0	0	0	0	0
1880	0	0	0	0	0	0	3	0	0	0	0	0	0	0	0	0	0	0
1881	0	0	0	0	0	0	3	0	0	0	0	0	0	0	0	0	0	0
1882	0	0	0	0	0	0	0	3	0	0	0	0	0	0	0	0	0	0
1883	0	0	0	0	0	0	0	3	0	0	0	0	0	0	0	0	0	0
1884	0	0	0	0	0	0	0	0	3	0	0	0	0	0	0	0	0	0
1885	0	0	0	0	0	0	0	0	3	0	0	0	0	0	0	0	0	0
1886	0	0	0	0	0	0	0	0	3	0	0	0	0	0	0	0	0	0
1887	0	0	0	0	0	0	0	0	3	0	0	0	0	0	0	0	0	0
1888	0	0	0	0	0	0	0	0	0	3	0	0	0	0	0	0	0	0
1889	0	0	0	0	0	0	0	0	0	3	0	0	0	0	0	0	0	0
1890	0	0	0	0	0	0	0	0	0	3	0	0	0	0	0	0	0	0
1891	0	0	0	0	0	0	0	0	0	0	3	0	0	0	0	0	0	0
1892	0	0	0	0	0	0	0	0	0	0	3	0	0	0	0	0	0	0
1893	0	0	0	0	0	0	0	0	0	0	0	0	3	0	0	0	0	0
1894	0	0	0	0	0	0	0	0	0	0	0	0	3	0	0	0	0	0
1895	0	0	0	0	0	0	0	0	0	0	0	0	0	0	3	0	0	0
1896	0	0	0	0	0	0	0	0	0	0	0	0	0	0	3	0	0	0
1906	0	0	0	0	0	0	0	0	0	0	0	0	0	0	0	3	0	0
1907	0	0	0	0	0	0	0	0	0	0	0	0	0	0	0	3	0	0
1908	0	0	0	0	0	0	0	0	0	0	0	0	0	0	0	0	3	0
1909	0	0	0	0	0	0	0	0	0	0	0	0	0	0	0	0	3	0
1910	0	0	0	0	0	0	0	0	0	0	0	0	0	0	0	0	3	0
1911	0	0	0	0	0	0	0	0	0	0	0	0	0	0	0	0	0	3
1912	0	0	0	0	0	0	0	0	0	0	0	0	0	0	0	0	0	3
1913	0	2	0	0	0	0	0	0	0	0	0	0	0	0	0	0	0	0
1914	0	2	0	0	0	0	0	0	0	0	0	0	0	0	0	0	0	0
1915	0	2	0	0	0	0	0	0	0	0	0	0	0	0	0	0	0	0
1916	0	2	0	0	0	0	0	0	0	0	0	0	0	0	0	0	0	0
1917	2	0	0	0	0	0	0	0	0	0	0	0	0	0	0	0	0	0
1918	2	0	0	0	0	0	0	0	0	0	0	0	0	0	0	0	0	0
1919	2	0	0	0	0	0	0	0	0	0	0	0	0	0	0	0	0	0
1920	2	0	0	0	0	0	0	0	0	0	0	0	0	0	0	0	0	0
1921	0	0	2	0	0	0	0	0	0	0	0	0	0	0	0	0	0	0
1922	0	0	2	0	0	0	0	0	0	0	0	0	0	0	0	0	0	0
1923	0	0	0	2	0	0	0	0	0	0	0	0	0	0	0	0	0	0
1924	0	0	0	2	0	0	0	0	0	0	0	0	0	0	0	0	0	0
1925	0	0	0	2	0	0	0	0	0	0	0	0	0	0	0	0	0	0
1926	0	0	0	0	2	0	0	0	0	0	0	0	0	0	0	0	0	0
1927	0	0	0	0	2	0	0	0	0	0	0	0	0	0	0	0	0	0
1928	0	0	0	0	0	0	2	0	0	0	0	0	0	0	0	0	0	0
1929	0	0	0	0	0	0	2	0	0	0	0	0	0	0	0	0	0	0
1930	0	0	0	0	0	0	2	0	0	0	0	0	0	0	0	0	0	0
1931	0	0	0	0	0	0	2	0	0	0	0	0	0	0	0	0	0	0
1932	0	0	0	0	0	0	0	2	0	0	0	0	0	0	0	0	0	0
1933	0	0	0	0	0	0	0	2	0	0	0	0	0	0	0	0	0	0
1934	0	0	0	0	0	0	0	2	0	0	0	0	0	0	0	0	0	0
1935	0	0	0	0	0	0	0	0	2	0	0	0	0	0	0	0	0	0
1936	0	0	0	0	0	0	0	0	2	0	0	0	0	0	0	0	0	0
1937	0	0	0	0	0	0	0	0	0	2	0	0	0	0	0	0	0	0
1938	0	0	0	0	0	0	0	0	0	2	0	0	0	0	0	0	0	0
1939	0	0	0	0	0	0	0	0	0	2	0	0	0	0	0	0	0	0
1940	0	0	0	0	0	0	0	0	0	2	0	0	0	0	0	0	0	0
1941	0	0	0	0	0	0	0	0	0	2	0	0	0	0	0	0	0	0
1942	0	0	0	0	0	0	0	0	0	0	2	0	0	0	0	0	0	0
1943	0	0	0	0	0	0	0	0	0	0	2	0	0	0	0	0	0	0
1944	0	0	0	0	0	0	0	0	0	0	2	0	0	0	0	0	0	0
1945	0	0	0	0	0	0	0	0	0	0	2	0	0	0	0	0	0	0
1946	0	0	0	0	0	0	0	0	0	0	0	2	0	0	0	0	0	0
1947	0	0	0	0	0	0	0	0	0	0	0	0	2	0	0	0	0	0
1948	0	0	0	0	0	0	0	0	0	0	0	0	2	0	0	0	0	0
1949	0	0	0	0	0	0	0	0	0	0	0	0	2	0	0	0	0	0
1950	0	0	0	0	0	0	0	0	0	0	0	0	2	0	0	0	0	0
1951	0	0	0	0	0	0	0	0	0	0	0	0	2	0	0	0	0	0
1952	0	0	0	0	0	0	0	0	0	0	0	0	0	2	0	0	0	0
1953	0	0	0	0	0	0	0	0	0	0	0	0	0	2	0	0	0	0
1954	0	0	0	0	0	0	0	0	0	0	0	0	0	2	0	0	0	0
1955	0	0	0	0	0	0	0	0	0	0	0	0	0	0	2	0	0	0
1956	0	0	0	0	0	0	0	0	0	0	0	0	0	0	2	0	0	0
1957	0	0	0	0	0	0	0	0	0	0	0	0	0	0	2	0	0	0
1962	0	0	0	0	0	0	0	0	0	0	0	0	0	0	0	0	2	0
1963	0	0	0	0	0	0	0	0	0	0	0	0	0	0	0	0	2	0
1964	0	0	0	0	0	0	0	0	0	0	0	0	0	0	0	0	0	2
1965	0	0	0	0	0	1	0	0	0	0	0	0	0	0	0	0	0	0
1966	0	0	0	0	0	1	0	0	0	0	0	0	0	0	0	0	0	0
1967	0	0	0	0	0	0	0	0	0	0	1	0	0	0	0	0	0	0
1968	0	0	0	0	0	0	0	0	0	0	0	1	0	0	0	0	0	0
1969	0	0	0	0	0	0	0	0	0	0	0	0	0	1	0	0	0	0
1970	0	0	0	0	0	0	0	0	0	0	0	0	0	1	0	0	0	0
1971	0	0	0	0	0	0	0	0	0	0	0	0	0	0	0	0	0	1
1972	0	0	0	0	0	0	0	0	0	0	0	0	0	0	0	0	0	1

## Sheet: CoreOTUs
ASV_ID	taxonomy	score	represent_seq
1	k__Bacteria;p__Bacteroidota;c__Bacteroidia;o__Bacteroidales;f__Prevotellaceae;g__Prevotellaceae_UCG-001;s__uncultured_bacterium_g__Prevotellaceae_UCG-001	0.99	TGAGGAATATTGGTCAATGGGCGCGAGCCTGAACCAGCCAAGTAGCGTGCAGGACGACGGCCCTATGGGTTGTAAACTGCTTTTATACGGGGATAAAGTATGCCACGTGTGGTTTATTGCAGGTACCGTATGAATAAGGACCGGCTAATTCCGTGCCAGCAGCCGCGGTAATACGGAAGGTCCGGGCGTTATCCGGATTTATTGGGTTTAAAGGGAGCGTAGGCCGGGTTTTAAGCGTGCCGTGAAATGTCGGGGCTCAACCTTGACACTGCGGCGCGAACTGGAGTCCTTGAGTGCGCGGAACGTATGCGGAATTCGTGGTGTAGCGGTGAAATGCTTAGATATCACGAAGAACCCCGATTGCGAAGGCAGCATACGGCAGCGCTACTGACGCTGAAG…
10	k__Bacteria;p__Actinobacteriota;c__Actinobacteria;o__Nitriliruptorales;f__Nitriliruptoraceae;g__Nitriliruptoraceae	0.7	TGGAGAATCTTGCACAATGGGCGCAAGCCTGATGCAGCCATGCCGCGTGCGGGAAGAAGGCCTTCGGGTCGTAAACCGCTTTCAGCAGGGACGAAGCGAGAGTGACGGTACCTGCAGAAGAAGGACCGGCCAACTACGTGCCAGCAGCCGCGGTAATACGTAGGGTCCGAGCGTTGTCCGGAATCATTGGGCGTAAAGCGCATGTAGGCGGCCCGGTAAGTCGGATGTGAAATCCCAGGGCTCAACCCTGGAACTGCATCCGATACTGCTGGGCTTGAGGAAGGTAGAGGAGAGTGGAATTCCCGGTGTAGCGGTGGAATGCGCAGATATCGGGAGGAACACCAGCGGCGAAGGCGGCTCTCTGGGCCTCTCCTGACGCTGAGATGCGAAAGCGTGGGT…
21	k__Bacteria;p__Proteobacteria;c__Gammaproteobacteria;o__Oceanospirillales;f__Halomonadaceae;g__Halomonas;s__Halomonas_nitritophilus_g__Halomonas	0.9	TGGGGAATATTGGACAATGGGCGCAAGCCTGATCCAGCCATGCCGCGTGTGTGAAGAAGGCCCTCGGGTTGTAAAGCACTTTCAGTGGGGAAGAAAGCCTTCCGGTTAATACCCGGGAGGAAGGACATCACCCACAGAAGAAGCACCGGCTAACTCCGTGCCAGCAGCCGCGGTAATACGGAGGGTGCGAGCGTTAATCGGAATTACTGGGCGTAAAGCGCGCGTAGGTGGCTTGATAAGCCGGTTGTGAAAGCCCCGGGCTCAACCTGGGAACGGCATCCGGAACTGTCAGGCTAGAGTGCAGGAGAGGAAGGTAGAATTCCCGGTGTAGCGGTGAAATGCGTAGAGATCGGGAGGAATACCAGTGGCGAAGGCGGCCTTCTGGACTGACACTGACAC…
358	k__Bacteria;p__Firmicutes;c__Clostridia;o__Clostridiales;f__Clostridiaceae;g__Candidatus_Arthromitus	1	TGGGGAATATTGCACAATGGGGGAAACCCTGATGCAGCAACGCCGCGTGAGTGAAGAAGGTTTTCGGATTGTAAAGCTCTGTGAGCAGGGAAGAGAAAGGACGGTACCTGCAAAGCAAGCCACGGCTAACTACGTGCCAGCAGCCGCGGTAATACGTAGGTGGCAAGCGTTGTTCGGAATAACTGGGCGTAAAGGATGCGTAGGCGGTTATGTAAGTTATATGTTAAAGATATAGGCTTAACCTGTAGAGAGCATATAAAACTGCATAACTAGAGTGCAGGAGAGGTAAGTGGAATTCCTAGTGTAGCGGTGAAATGCGTAGAGATTAGGAAGAACACCAGTGGCGAAGGCGACTTACTGGACTGTAACTGACGCTGAGGCATGAGAGCATGGGGAGCA…

## Sheet: β-diversity
pc vector number	1	2	3	4	5	6	7	8	9	10	11	12	13	14	15	16	17	18
HS0-2	-0.110594	0.0570419164441	-0.294071	0.153372	-0.146227	0.0842536275777	-0.117801	0.0373034972711	-0.113861	-0.0535756	0.0404798759261	-0.0290359	-0.0360647	-0.0115536	-0.0412674	-0.00310598	-0.0168098	0
HS0-1	-0.122174	-0.055041	0.166049	-0.0122512	-0.07836	0.145238	0.0437126333463	-0.203089	-0.0765927	-0.0972992	0.00650726660472	0.0925693555228	0.0488481668974	-0.0606759	-0.00975949	-0.0731974	0.00697971831207	0
HS0-3	-0.0886353	0.0701195713886	0.122372	0.0841006347523	-0.161169	0.0256203747867	0.0877646024851	-0.00426053	0.121388	0.105734	0.088703	-0.140062	-0.0839511	0.0442342567685	0.0105454	-0.0537143	0.0685194096977	0
HS1-1	-0.174393	-0.0617312	0.0266347	0.149116	0.100034	-0.0317471	-0.160461	-0.121542	0.0398256	0.10213	-0.0950284	-0.0472503	0.110584	0.0681816421435	0.0435857560053	0.0572452983861	0.00523381992454	0
HS1-2	-0.157677	0.171769	-0.0891199	-0.135134	0.140123	0.0892658869662	0.0408719508544	0.0124728984593	0.00916699942859	0.122653	0.174195	0.0806200698937	0.0480761521141	-0.0312611	0.0264090496206	0.0545587735328	6.74335100826e-05	0
HS1-3	0.00372771464586	0.332541	0.0814795	-0.14621	0.0747580581882	0.0335249140953	-0.0783579	0.0301042791482	-0.0459464	-0.0946083	-0.100871	-0.115506	-0.0239294	0.0317614509844	0.0472968607815	-0.0534061	-0.0300287	0
HS2-1	-0.202681	0.0284028207966	0.0372346472753	0.0915719191552	-0.0261761	-0.0626704	0.0447057	0.178942	0.0840266726337	-0.116307	-0.0624827	0.155778	0.0153424123474	0.0103309422489	0.0839036610231	0.0021287401668	0.0548148	0
HS2-2	-0.159086	0.0113192	0.0588992135408	-0.054732	-0.00649082	-0.171188	0.0775052715775	-0.0388036	-0.0369088	-0.0901366	0.00657833442257	-0.067783	-0.0309649	-0.0365934	-0.129586	0.155313	0.00586506227052	0
HS2-3	0.233305	-0.057739	-0.1016	-0.0611126	-0.0324345	-0.0733435	-0.0479551	-0.133788	0.0795878	-0.123853	0.101238	0.00843137986765	-0.0497165	0.0428962586957	0.137628	0.0549584715559	0.0167707776293	0
HS3-1	-0.0356486	-0.237852	0.0454232455352	-0.0457953	-0.0143494	0.145594	0.0784638	0.0823104952922	-0.0372471	0.0360945671717	-0.0603543	-0.0515411	-0.0765941	-0.00216296	0.0885896435582	0.0803044388968	-0.128233	0
HS3-2	0.0484972	-0.231046	-0.0301797	-0.104351	0.0620700960026	0.00552120345671	0.0234918041024	0.0994613464056	-0.118433	-0.0270401	0.0364970062457	-0.0956033	0.107028	0.0514615353918	-0.00262175	-0.0505561	0.13354	0
HS3-3	-0.0289365	-0.114411	0.0018025806203	0.0235574	0.12387	-0.126684	-0.0864389	0.0149448031146	0.0247649605783	0.0323585344218	0.0219336727109	-0.0285075	-0.085308	-0.202551	0.0175219599679	-0.104329	-0.01522	0
HS4-1	0.112848	0.0298102590301	-0.186005	-0.116853	-0.125504	0.00894532648176	0.0881687827846	-0.0258447	0.129028	0.0549637881729	-0.152698	-0.0160878	0.112499	-0.0904794	-0.0274454	-0.00668217	0.00435424492842	0
HS4-2	-0.0393068	-0.107302	-0.0844896	-0.0515346	0.122653	0.0280917297917	0.00652218197854	-0.0192639	0.125349	-0.0392301	-0.00912598	0.0556671178607	-0.0725776	0.138769	-0.138736	-0.0869041	-0.05683	0
HS4-3	0.0496684471027	0.0115650708529	0.0347728951552	-0.114084	-0.134663	-0.154515	-0.0474344	-0.00960119	-0.140958	0.161595	-0.0477147	0.129002	-0.0675217	0.0694356871007	0.00468932943651	-0.0261758	-0.000460429	0
HS5-1	0.18493	0.0148321265782	0.152122	0.0549899701874	-0.0828189	-0.052842	-0.0692022	0.0985932782034	0.0300825337905	-0.0181355	0.118908	0.00095973078504	0.153092	0.00365099918542	-0.0486479	-0.012417	-0.125173	0
HS5-2	0.281015	0.0285993424805	0.111091	0.0593606725196	0.0477564451479	0.155309	-0.103418	0.0451623175823	0.0254425428185	0.0263808427856	-0.0417806	0.0630085089259	-0.0724507	-0.0439651	-0.0792291	0.0889661046119	0.0985141	0
HS5-3	0.205141	0.109123	-0.0524152	0.225987	0.136928	-0.0483744	0.219862	-0.0431024	-0.0987159	0.0182761602829	-0.0249848	0.00534163760151	0.00360817493821	0.0185201597596	0.0171234908303	-0.022987	-0.0219047	0
eigvals	0.38758	0.307896	0.243646	0.208221	0.186728	0.168836	0.155424	0.141554	0.131658	0.130047	0.120936	0.116643	0.105295	0.0939262797106	0.0866394053162	0.0812745860249	0.0728860198525	0
% variation explained	14.1494	11.2404	8.89483	7.60154	6.8169	6.16371	5.67408	5.16775	4.80646	4.74764	4.41504	4.25832	3.844	3.42898	3.16296	2.9671	2.66086	0
