# Supplementary material for: Effects of Undaria pinnatifida-derived brown algae polysaccharide (UPS) on the nutritional composition, digestive capacity, immune performance and intestinal microbiota of juvenile sea cucumber (Apostichopus japonicus)
Source: PeerJ. 2025 Aug 19;13:e19944. doi: 10.7717/peerj.19944 (PMC12372788; doi:10.7717/peerj.19944)
Supplement: Supplemental Information 12 — Raw data for α diversity analysis including Ace index, Chao 1 index, goods coverage and Simpson index. [file peerj-13-19944-s012.xlsx]

## Sheet: α diversity
Sample	simpson	chao1	observed_species	shannon	goods_coverage	PD_whole_tree	ace
HS0-1	0.9866054785028	225.031	225	6.8504	0.999991	18.861	227.318046011743
HS0-2	0.9845269639719	201.093	201	6.49382	0.9999790838739	17.7595	201.080791776212
HS0-3	0.9765990251979	191	191	6.21941	0.99999	17.5295	190
HS1-1	0.9318254386161	202	202	5.61535	0.999999	19.0355	203.638189388816
HS1-2	0.9665727815747	146.1	145.7	5.64851	0.9999716138289	14.335	148.901764053809
HS1-3	0.9544766987354	120.583	119.9	5.39602	0.9999701198199	10.8645	118.230774225265
HS2-1	0.9779629738324	166	166	6.1167	0.999997	14.9451	167.138069748581
HS2-2	0.9574640472087	148.033	148	5.67683	0.999994	15.0608	148.701186623517
HS2-3	0.9777304750117	169.058	169	5.92028	0.999991	16.3968	169.805736098179
HS3-1	0.9722804452671	235	235	6.11243	1	20.0375	235.829955249239
HS3-2	0.9686825954317	186.126	186	5.8869	0.9999746018469	17.4961	186.834349145904
HS3-3	0.9776347952666	146	146	5.9608	0.999985	14.5014	146.462835639306
HS4-1	0.9594113938007	163.025	163	5.49826	0.999988	15.8277	162.997465451697
HS4-2	0.9773230729422	201.648	200.8	6.14852	0.9999566737384	18.0628	201.915327474914
HS4-3	0.9831173779976	156.075	155.8	6.23664	0.9999760958558	14.9561	154.667601345938
HS5-1	0.9336303289231	157	157	5.15988	0.999999	14.5964	156.289714495867
HS5-2	0.8184357032867	150.039	150	4.39967	0.999991	16.4474	150.085651266459
HS5-3	0.9795638256392	173.383	172.8	6.05963	0.9999701198199	15.9805	173.225681067492
