# Supplementary material for: Effects of Undaria pinnatifida-derived brown algae polysaccharide (UPS) on the nutritional composition, digestive capacity, immune performance and intestinal microbiota of juvenile sea cucumber (Apostichopus japonicus)
Source: PeerJ. 2025 Aug 19;13:e19944. doi: 10.7717/peerj.19944 (PMC12372788; doi:10.7717/peerj.19944)
Supplement: Supplemental Information 13 — Raw data of microbial composition in phylum, family and genus levels. [file peerj-13-19944-s013.xlsx]

## Sheet: Phylum
Taxonomy	Bacteroidota	Proteobacteria	Firmicutes	Actinobacteriota	Dependentiae	Other	Fusobacteriota	Bdellovibrionota	Campilobacterota	Acidobacteriota	Verrucomicrobiota	Desulfobacterota	Myxococcota	Gemmatimonadota	Deferribacterota	NB1-j
HS0-2	0.448777	0.308344	0.196316	0.0403761	0.0054958	5.52E-05	0	0	0	4.14E-05	0.000538533	0	0	5.52E-05	0	0
HS0-1	0.433501	0.3352	0.173157	0.0158697	0.00746485	0.016243	0	0.0066769	0.00196298	0	0.000926195	0.008944	0	5.53E-05	0	0
HS0-3	0.44272	0.292386	0.198425	0.0631976	0.00161562	0.000201952	0	4.04E-05	8.08E-05	0	0.00123864	9.42E-05	0	0	0	0
HS1-1	0.23397	0.665405	0.0843077194946	0.00861485	0.000382882	7.36E-05	0	0.00276853	5.89E-05	0	0.00434424	7.36E-05	0	0	0	0
HS1-2	0.359024	0.529957	0.0757857408414	0.0253811	0.00441845	5.72E-05	0	0.00346041	0	0	0.000614865	0	0.00115824	0	0	0.000142992
HS1-3	0.426869	0.429776	0.125937	0.0172528	0.000165362	0	0	0	0	0	0	0	0	0	0	0
HS2-1	0.35064	0.457096	0.129456	0.053159	0.000454233	2.75E-05	0	0.00236752	0.00401927	0	0.00278045	0	0	0	0	0
HS2-2	0.331556	0.446393	0.156656	0.0520874	0.000632983	0	0	0.00862263	0.00372756	0	0.00022506	9.85E-05	0	0	0	0
HS2-3	0.573314	0.207638	0.178587	0.0400183	0	0	0	0	0	5.54E-05	0	0.000263096	0	8.31E-05	4.15E-05	0
HS3-1	0.269097	0.66457	0.0326629498818	0.0256429	0.000408652	0.000277299	0	0.00183893	0.00313786	0	0.00183893	0.00049622	0	0	2.92E-05	0
HS3-2	0.48334	0.303618	0.136968	0.058069	0.00455522	0.000702883	0	0	0.0118544	0	0.000594747	0.00027034	0	0	2.70E-05	0
HS3-3	0.513945	0.2805	0.173016	0.0262973	0	0.000175413	0	0.00352288	0.00178337	0	0.000613945	0.000146177	0	0	0	0
HS4-1	0.623972	0.327206	0.00807469789253	0.0388473	0.00159552	9.71E-05	0	0	0	0	0	8.32E-05	0	0.000124866	0	0
HS4-2	0.426333	0.391484	0.116369	0.0589823	0.00100894	0.000109075	0	0.0021815	0.00245419	0	0.000954407	0	0	0	0.000122709	0
HS4-3	0.47961	0.241881	0.216154	0.0494106	0.012305	0	0	0	0.000530858	0	0	6.81E-05	0	4.08E-05	0	0
HS5-1	0.411622	0.430252	0.0744336569579	0.0604897	0	0.0226678	0.000182918	0	4.22E-05	0	4.22E-05	0.00022513	0	0	4.22E-05	0
HS5-2	0.215924	0.534816	0.178526	0.0368412	0.000516403	0	0.0330634	0	0	0	0	0.000231022	0	4.08E-05	4.08E-05	0
HS5-3	0.475171	0.237995	0.232653	0.0294994	0	5.37E-05	0.00379815	0	0.00132868	0.0194202	0	8.05E-05	0	0	0	0

## Sheet: family
Taxon	HS0-2	HS0-1	HS0-3	HS1-1	HS1-2	HS1-3	HS2-1	HS2-2	HS2-3	HS3-1	HS3-2	HS3-3	HS4-1	HS4-2	HS4-3	HS5-1	HS5-2	HS5-3
k__Bacteria;Other;Other;Other;Other	5.52341236416e-05	0.0162429671408	0.000201952204645	7.36311960651e-05	5.71967855407e-05	0	2.75292498279e-05	0	0	0.000277299395779	0.000702883172707	0.000175412951323	9.71183595322e-05	0.00010907504363	0	0.0226677923174	0	5.36840692524e-05
k__Bacteria;p__Acidobacteriota;c__Acidobacteriae;o__Bryobacterales;f__Bryobacteraceae	4.14255927312e-05	0	0	0	0	0	0	0	5.53886204079e-05	0	0	0	0	0	0	0	0	5.36840692524e-05
k__Bacteria;p__Acidobacteriota;c__Acidobacteriae;o__Subgroup_2;f__Subgroup_2	0	0	0	0	0	0	0	0	0	0	0	0	0	0	0	0	0	0.0193665279828
k__Bacteria;p__Actinobacteriota;c__Actinobacteria;o__Actinomycetales;f__Actinomycetaceae	0	0	0.000605856613935	0	0	0	0	0	0	0	0	0	0	0	0	0	0	0
k__Bacteria;p__Actinobacteriota;c__Actinobacteria;o__Bifidobacteriales;f__Bifidobacteriaceae	0.0108535052956	4.14714054659e-05	0.00414675193538	0	0.000128692767466	0	2.75292498279e-05	8.4397681877e-05	0	0.00567734026095	0	0	0	0	0	0	0	0
k__Bacteria;p__Actinobacteriota;c__Actinobacteria;o__Corynebacteriales;f__Corynebacteriaceae	0	0	0.00846852911478	0	0	0	0	0.00303831654757	0	0	0	0	0.00031910318132	0.00499018324607	0	0	0.000625118908488	0
k__Bacteria;p__Actinobacteriota;c__Actinobacteria;o__Corynebacteriales;f__Dietziaceae	0.00428064458222	0	0.0051565129586	7.36311960651e-05	0.00237366659994	0.00140557821629	4.12938747419e-05	0.000506386091262	0	0.00186812224525	0	0	0.000110992410894	0.000531740837696	0	0.00353172928099	0.00119587965102	0
k__Bacteria;p__Actinobacteriota;c__Actinobacteria;o__Corynebacteriales;f__Mycobacteriaceae	0	0	0	0	0	0	0	0	0	0	0	0.00153486332408	0	0	0	0	0.00629195770935	0
k__Bacteria;p__Actinobacteriota;c__Actinobacteria;o__Corynebacteriales;f__Nocardiaceae	0	0	0	0.00097193178806	0	0	0	0	0	0	0	0	0	0	0	0	0	0.00437525164407
k__Bacteria;p__Actinobacteriota;c__Actinobacteria;o__Micrococcales;f__Bogoriellaceae	0	0	0	0	0	0	0	0	0	0	0	0	0	0	0	0	0	4.02630519393e-05
k__Bacteria;p__Actinobacteriota;c__Actinobacteria;o__Micrococcales;f__Dermabacteraceae	0	0	0	0.000117809913704	0	0	0	0.000323524447195	0	0	0	0	0	0	0	0	0	0
k__Bacteria;p__Actinobacteriota;c__Actinobacteria;o__Micrococcales;f__Intrasporangiaceae	0	0.00530833989964	0	0	0	0	0	0	0.00983148012241	0	0	0	0	0	0.00210981950834	0	0	0
k__Bacteria;p__Actinobacteriota;c__Actinobacteria;o__Micrococcales;f__Microbacteriaceae	0	0	0	0	0	0	0	0	0	0	0	0	0	0	0	0.000112565076685	0	0
k__Bacteria;p__Actinobacteriota;c__Actinobacteria;o__Micrococcales;f__Micrococcaceae	0.0179648987144	0.00648336305451	0.0253786603837	0.00484493270109	0.0070352046215	0.00609083893727	0.0115485203028	0.00315084679007	0.0116039159755	0.00823141364313	0.0190454305835	0.0123958485602	0.00770009850576	0.0180110165794	0.0191789399178	0.0240185732377	0.0191612534993	0.00646893034492
k__Bacteria;p__Actinobacteriota;c__Actinobacteria;o__Nitriliruptorales;f__Nitriliruptoraceae	0.00555102942598	0.00400890252837	0.0113227869404	0.00182605366242	0.0137415277261	0.00738617572484	0.0413902271163	0.0373881730715	0.0177658999958	0.00828979246329	0.0359957	0.0118988451981	0.0281505	0.0228239528796	0.0265837258051	0.0264668636556	0.00875166471883	0.0179439001476
k__Bacteria;p__Actinobacteriota;c__Actinobacteria;o__Propionibacteriales;f__Nocardioidaceae	0	0	0.000148098283406	0	0	0	0	0	0	0.000423246446189	0	0	0	0	0	0	0	0
k__Bacteria;p__Actinobacteriota;c__Actinobacteria;o__Propionibacteriales;f__Propionibacteriaceae	0	0	0	0	0	0	0	0.00367129916165	0	0	0	0	0	0	0	0	0	8.05261038787e-05
k__Bacteria;p__Actinobacteriota;c__Actinobacteria;o__Streptomycetales;f__Streptomycetaceae	0	0	0	0	0	0	0	0.00293985258538	0	0	0	0	0	0	0	0	0	0
k__Bacteria;p__Actinobacteriota;c__Actinobacteria;o__Streptosporangiales;f__Nocardiopsaceae	0	0	0.00797038034332	0.000721585721438	0.00210198186862	0.00237019071767	0.000151410874054	0.00084397681877	0.000775440685711	0.00115298169824	0.00302780443627	0.000467767870194	0.00256669950192	0.00148614746946	0.00119783301119	0.0063599268327	0.000815372489332	0.000590524761777
k__Bacteria;p__Actinobacteriota;c__Coriobacteriia;o__Coriobacteriales;f__Atopobiaceae	0	0	0	5.89049568521e-05	0	0	0	0	0	0	0	0	0	0	0	0	0	0
k__Bacteria;p__Actinobacteriota;c__Coriobacteriia;o__Coriobacteriales;f__Coriobacteriaceae	0.0017260663638	0	0	0	0	0	0	0	0	0	0	0	0	0	0.000340293469088	0	0	0
k__Bacteria;p__Actinobacteriota;c__Coriobacteriia;o__Coriobacteriales;f__Eggerthellaceae	0	0	0	0	0	0	0	0	0	0	0	0	0	0.0111392888307	0	0	0	0
k__Bacteria;p__Actinobacteriota;c__Thermoleophilia;o__Gaiellales;f__uncultured	0	0	0	0	0	0	0	0.000140662803128	4.1541465306e-05	0	0	0	0	0	0	0	0	0
k__Bacteria;p__Actinobacteriota;c__Thermoleophilia;o__Solirubrobacterales;f__67-14	0	2.7647603644e-05	0	0	0	0	0	0	0	0	0	0	0	0	0	0	0	0
k__Bacteria;p__Bacteroidota;c__Bacteroidia;Other;Other	0	4.14714054659e-05	6.73174015483e-05	0	0	6.89008929556e-05	4.12938747419e-05	8.4397681877e-05	0	0	0	0	0	0	0	0	0	0
k__Bacteria;p__Bacteroidota;c__Bacteroidia;o__Bacteroidales;Other	0	0.00345595045549	0.0288657017839	0.00541925603039	0.0145279835273	0	0	0	0	0	0	0.0196462505482	0.0155389375251	0	0.0150545830724	0	0.00390019840731	0
k__Bacteria;p__Bacteroidota;c__Bacteroidia;o__Bacteroidales;f__Bacteroidaceae	0.0157002996451	0.0576037821922	0.0235880175025	0.0398050245928	0.0105385077359	0.0335960754051	0.0173158981418	0.00891802171834	0.000484650428569	0.00666978020374	0.000148686824996	0.0392047946207	0.000332977232682	0.000286321989529	0.0263659379849	0.0129590544534	0.0380235370859	0.0638303583412
k__Bacteria;p__Bacteroidota;c__Bacteroidia;o__Bacteroidales;f__Bacteroidetes_BD2-2	0	0	0	8.83574352782e-05	0	0	0.0026565726084	0	0.000124624395918	0	0	0	0	0	0	0	0	0
k__Bacteria;p__Bacteroidota;c__Bacteroidia;o__Bacteroidales;f__Dysgonomonadaceae	0	0	0	0	0	0	0	0	0.000318484567346	0	0	0	0	0	0	0	0	0
k__Bacteria;p__Bacteroidota;c__Bacteroidia;o__Bacteroidales;f__Marinifilaceae	0	0	0	0	0	0	0	0	9.69300857139e-05	0.000116757640328	9.46188886336e-05	0.000102324221605	9.71183595322e-05	0.000259053228621	0	0	5.43581659555e-05	6.71050865656e-05
k__Bacteria;p__Bacteroidota;c__Bacteroidia;o__Bacteroidales;f__Marinilabiliaceae	0	0	0	0.0003387035019	8.5795178311e-05	0	0	0	0	0	0	0	0.000430095592214	0	0	0.00182918249613	0	0
k__Bacteria;p__Bacteroidota;c__Bacteroidia;o__Bacteroidales;f__Muribaculaceae	0.293086	0.196022	0.233322	0.0559891614879	0.198745	0.182518	0.165547	0.196211	0.318208	0.104425	0.108474	0.193554	0.23178	0.20712	0.208015	0.171577	0.0608539667872	0.143538
k__Bacteria;p__Bacteroidota;c__Bacteroidia;o__Bacteroidales;f__Porphyromonadaceae	0	0	0	0	0	0	0	0	0	0	0	0.000350825902646	0	0	0	0	0	0
k__Bacteria;p__Bacteroidota;c__Bacteroidia;o__Bacteroidales;f__Prevotellaceae	0.0827821428078	0.0788786131962	0.117253	0.0281271168969	0.100509	0.166974	0.105877	0.0667304338041	0.151862	0.0294521147728	0.11676	0.168806	0.251162	0.0933001	0.162837	0.148783	0.100603	0.149752
k__Bacteria;p__Bacteroidota;c__Bacteroidia;o__Bacteroidales;f__Prolixibacteraceae	0	0	5.38539212386e-05	5.89049568521e-05	0	5.51207143645e-05	0	0	0	0	0	0	0	0	0	0	0	0
k__Bacteria;p__Bacteroidota;c__Bacteroidia;o__Bacteroidales;f__Rikenellaceae	0.0507877766884	0.038126	0.0370514978122	0.0186875975613	0.0132982526382	0.0436556057767	0.0405092911218	0.0290187362854	0.0977470678649	0.0241688315479	0.0134359	0.0356819178483	0.0359892892323	0.0164976	0.0467290991751	0.0743070212467	0.00852064251352	0.110509
k__Bacteria;p__Bacteroidota;c__Bacteroidia;o__Bacteroidales;f__Tannerellaceae	0	0	0	0	0	0	0	2.81325606257e-05	0	0	0	0	0	6.81719022688e-05	0.0134211744208	0	9.51267904221e-05	8.05261038787e-05
k__Bacteria;p__Bacteroidota;c__Bacteroidia;o__Bacteroidales;f__vadinHA21	0	0	0	0	0	0	4.12938747419e-05	0	0	0	0	0	0	0	0	0	0	0
k__Bacteria;p__Bacteroidota;c__Bacteroidia;o__Chitinophagales;f__Chitinophagaceae	0	0	0	0	0	0	0	0	0	7.29735252051e-05	0	0	0	6.81719022688e-05	0	0	0	0
k__Bacteria;p__Bacteroidota;c__Bacteroidia;o__Chitinophagales;f__Saprospiraceae	0	0	0	0	0	0	0	0	0	0	0	0	8.32443081704e-05	0	0	0	0	0
k__Bacteria;p__Bacteroidota;c__Bacteroidia;o__Chitinophagales;f__uncultured	0	0	0	0	0	0	0	0	0	0	0.000513645395439	0	0	0	0	0	0	0
k__Bacteria;p__Bacteroidota;c__Bacteroidia;o__Cytophagales;f__Cyclobacteriaceae	0	0.000262652234618	0	0.0038435484346	0.00220207624332	0	0	0	0	0.00151784932427	0.00297373649991	0	0	0.00842604712042	2.7223477527e-05	0	2.71790829777e-05	0
k__Bacteria;p__Bacteroidota;c__Bacteroidia;o__Cytophagales;f__Hymenobacteraceae	0.000303787680029	0.000193533225508	0.000161561763716	0	2.85983927703e-05	0	0	5.62651212513e-05	0.000470803273467	0.000452435856271	0.000364958570444	0	0.000194236719064	0.000163612565445	0.000149729126399	0	2.71790829777e-05	0
k__Bacteria;p__Bacteroidota;c__Bacteroidia;o__Cytophagales;f__Spirosomaceae	0	0	0	0	0	0	0	0	0	0	0	0	0	0	0	0	0.00381866115837	0
k__Bacteria;p__Bacteroidota;c__Bacteroidia;o__Flavobacteriales;Other	0	0	0	0	0	0	0	0	0	0	0	0	0	0.000804428446771	0	0	0	0
k__Bacteria;p__Bacteroidota;c__Bacteroidia;o__Flavobacteriales;f__Crocinitomicaceae	0	0	0	0	0	0	0	0	0	0.00132811815873	0	0	0	0	0	0	0	0
k__Bacteria;p__Bacteroidota;c__Bacteroidia;o__Flavobacteriales;f__Cryomorphaceae	0.000731852138251	0	0	0.00163461255265	0.00203048588669	0	0	0.0102543183481	0.000664663444895	0	0.00573120125438	0.00130097938898	5.5496205447e-05	0	0	0	0	0
k__Bacteria;p__Bacteroidota;c__Bacteroidia;o__Flavobacteriales;f__Flavobacteriaceae	0.00538532705505	0.0589170433653	0.00220801077078	0.0799782	0.0164440758429	0	0.0185271851342	0.0202554436505	0.00333716437958	0.100893	0.234844	0.0552989329045	0.0857555114669	0.0993401	0.00548553072169	0.00216687772619	0	0.00703261307207
k__Bacteria;p__Bacteroidota;c__Bacteroidia;o__Flavobacteriales;f__Weeksellaceae	0	0	0.000148098283406	0	0	0	0.000123881624226	0	0	0	0	0	0.00255282545056	0	0.00152451474151	0	0	0
k__Bacteria;p__Bacteroidota;c__Bacteroidia;o__Sphingobacteriales;f__NS11-12_marine_group	0	0	0	0	0	0	0	0	0	0	0	0	0	0	0	0	0	0.000362367467454
k__Bacteria;p__Bacteroidota;c__Kapabacteria;o__Kapabacteriales;f__Kapabacteriales	0	0	0	0	0.000614865444562	0	0	0	0	0	0	0	0	0	0	0	0	0
k__Bacteria;p__Bdellovibrionota;c__Bdellovibrionia;o__Bacteriovoracales;f__Bacteriovoracaceae	0	0.00667689628001	4.0390440929e-05	0.0003387035019	0	0	0.0023675154852	0.00862262983177	0	0.00178055	0	0.00346440578863	0	0.00205879144852	0	0	0	0
k__Bacteria;p__Bdellovibrionota;c__Bdellovibrionia;o__Bdellovibrionales;f__Bdellovibrionaceae	0	0	0	0.000574323329308	0	0	0	0	0	5.8378820164e-05	0	0	0	0	0	0	0	0
k__Bacteria;p__Bdellovibrionota;c__Oligoflexia;o__Oligoflexales;f__uncultured	0	0	0	0.00179660118399	0.00346040552521	0	0	0	0	0	0	5.84709837743e-05	0	0.000122709424084	0	0	0	0
k__Bacteria;p__Bdellovibrionota;c__Oligoflexia;o__Silvanigrellales;f__Silvanigrellaceae	0	0	0	5.89049568521e-05	0	0	0	0	0	0	0	0	0	0	0	0	0	0
k__Bacteria;p__Campilobacterota;c__Campylobacteria;o__Campylobacterales;f__Arcobacteraceae	0	0.00196297985872	8.0780881858e-05	5.89049568521e-05	0	0	0.00401927047488	0.0037275642829	0	0.00313786158382	0.0117327421906	0.00178336500512	0	0.00241328534031	0.000530857811777	0	0	0.00122131257549
k__Bacteria;p__Campilobacterota;c__Campylobacteria;o__Campylobacterales;f__Helicobacteraceae	0	0	0	0	0	0	0	0	0	0	0.000121652856815	0	0	4.09031413613e-05	0	4.22119037569e-05	0	0.000107368138505
k__Bacteria;p__Deferribacterota;c__Deferribacteres;o__Deferribacterales;f__Deferribacteraceae	0	0	0	0	0	0	0	0	4.1541465306e-05	2.9189410082e-05	2.7033968181e-05	0	0	0.000122709424084	0	4.22119037569e-05	4.07686244666e-05	0
k__Bacteria;p__Dependentiae;c__Babeliae;o__Babeliales;Other	0.00260981234206	0.00168650382228	8.0780881858e-05	8.83574352782e-05	0	0	0.000454232622161	0	0	0.000102162935287	0.0045552236385	0	0	0	0.00274957123023	0	0	0
k__Bacteria;p__Dependentiae;c__Babeliae;o__Babeliales;f__Babeliaceae	0	0	0	0	0	0	0	0	0	0.000102162935287	0	0	0	0	0	0	0.000516402576577	0
k__Bacteria;p__Dependentiae;c__Babeliae;o__Babeliales;f__Babeliales	0	0.00577834916159	0.0015348367553	0.000294524784261	0.00441845168302	0.000165362143093	0	0.000267259325944	0	0.000204325870574	0	0	0.00154001970115	0.00100894415358	0.00955544061198	0	0	0
k__Bacteria;p__Dependentiae;c__Babeliae;o__Babeliales;f__Vermiphilaceae	0.00288598296027	0	0	0	0	0	0	0.000365723288134	0	0	0	0	5.5496205447e-05	0	0	0	0	0
k__Bacteria;p__Desulfobacterota;c__Desulfobulbia;o__Desulfobulbales;f__Desulfocapsaceae	0	0	0	0	0	0	0	0	0	0.000189731165533	0	0	0	0	0	0	0	0
k__Bacteria;p__Desulfobacterota;c__Desulfovibrionia;o__Desulfovibrionales;f__Desulfovibrionaceae	0	0.00894399977882	9.42443621676e-05	7.36311960651e-05	0	0	0	9.84639621898e-05	0.000263095946938	0.000306488805861	0.00027033968181	0.000146177459436	8.32443081704e-05	0	6.80586938175e-05	0.00022513015337	0.000231022205311	8.05261038787e-05
k__Bacteria;p__Firmicutes;c__Bacilli;Other;Other	0	0	0	0	0	0	0	0	0	2.9189410082e-05	0	0	0	0	0	0	0	0
k__Bacteria;p__Firmicutes;c__Bacilli;o__Bacillales;f__Bacillaceae	0	0.000898547118429	0.000121171322787	0.000132536152917	0.000228787142163	9.64612501378e-05	0.00013764624914	0	0.000180013016326	0.000116757640328	0	0.000175412951323	0.000180362667703	0.00526287085515	0.00232760732856	8.44238075137e-05	0	0.000187894242384
k__Bacteria;p__Firmicutes;c__Bacilli;o__Bacillales;f__Salisediminibacteriaceae	4.14255927312e-05	0	0	0	0	0	0	0	0	0	0	0	0	0	0	0	0	0
k__Bacteria;p__Firmicutes;c__Bacilli;o__Entomoplasmatales;f__Entomoplasmataceae	0.000193319432746	0.000304123640083	0.000632783574554	0.000265072305835	0.000128692767466	0.000206702678867	0	0	0.000373873187754	0.000335678215943	0.000729917140888	0.00040929688642	0.000263606975873	0.000136343804538	0	0.000703531729281	0.000339738537222	0.000147631190444
k__Bacteria;p__Firmicutes;c__Bacilli;o__Erysipelotrichales;f__Erysipelatoclostridiaceae	0	0	0	0	0	0	0	2.81325606257e-05	0	0	0	0	0	0	0	4.22119037569e-05	0	0.00527445980405
k__Bacteria;p__Firmicutes;c__Bacilli;o__Erysipelotrichales;f__Erysipelotrichaceae	0	2.7647603644e-05	2.69269606193e-05	0	0	0	0	0	0	0	0	0	0	0	0	0	0	0
k__Bacteria;p__Firmicutes;c__Bacilli;o__Lactobacillales;f__Carnobacteriaceae	0.000110468247283	0	0	0	0	0	0.00447350309704	0	0.00199399033469	0	0	0	0	0	0	0	0.00141331231484	0
k__Bacteria;p__Firmicutes;c__Bacilli;o__Lactobacillales;f__Enterococcaceae	0.00153274693105	0.0166576811955	0	0	0	0	0	0	0	0	0	0	0	0	0	0	0	0
k__Bacteria;p__Firmicutes;c__Bacilli;o__Lactobacillales;f__Lactobacillaceae	0	8.29428109319e-05	0	0.00914499455129	0	0	0	0.0159792944354	0.00020770732653	0.000102162935287	9.46188886336e-05	0.0361643034644	2.77481027235e-05	0.00914866928447	0	0.000112565076685	0.00896909738265	0
k__Bacteria;p__Firmicutes;c__Bacilli;o__Lactobacillales;f__Leuconostocaceae	0	0	0.00162908111747	0	0	0	0	0	0	0	0	0	0	0	0	0	0	0
k__Bacteria;p__Firmicutes;c__Bacilli;o__Lactobacillales;f__Streptococcaceae	0.0297021499883	0.0221042591133	0	0.00435896680706	0.0320016	0.0103075735862	0	0.0252911720025	0	0	0.0121517686974	0.0134190907762	0	0	0.0399096180546	0	0.000163074497866	0.00543551201181
k__Bacteria;p__Firmicutes;c__Bacilli;o__Mycoplasmatales;f__Mycoplasmataceae	0	0	0	0	0	0	0.0294150034412	0	0	0	0	0	0	0	0	0	0	0.0157428533083
k__Bacteria;p__Firmicutes;c__Bacilli;o__RF39;f__RF39	0	0.00640042024358	0	0	0	0	0	0	0	0	0	0	0	0	0	0	0	0
k__Bacteria;p__Firmicutes;c__Bacilli;o__Staphylococcales;f__Gemellaceae	0	0	0	0	0	0	0	0	0	0	0	0	0	0	0	0	0.000421275786155	0.0158904844987
k__Bacteria;p__Firmicutes;c__Bacilli;o__Staphylococcales;f__Staphylococcaceae	0	8.29428109319e-05	0.00208684	0.00145789768209	0.0015443132096	0	0.00728148657949	0.000379789568447	0	0.000204325870574	0	0	0	0	0.0173685786622	0	0.0515451308673	0.0130721
k__Bacteria;p__Firmicutes;c__Bacilli;o__Thermoactinomycetales;f__Thermoactinomycetaceae	0	0	0	0	0	0	0.00238128011012	0	0	0	0	0	0	0	0	0	0	0
k__Bacteria;p__Firmicutes;c__Clostridia;Other;Other	0.0151755754705	0	0	0	0.00965195755999	0	0	0	0	0	0	0	0	0	0	0	0	0
k__Bacteria;p__Firmicutes;c__Clostridia;o__Christensenellales;f__Christensenellaceae	0	0	0	0	0	0	0	0	0	0	2.7033968181e-05	0	0	0	0	0	0	0
k__Bacteria;p__Firmicutes;c__Clostridia;o__Clostridia;f__Gracilibacteraceae	0	0	0	0	0	0	0	0	2.7694310204e-05	0	0	0	0	0	4.08352162905e-05	0	0	0
k__Bacteria;p__Firmicutes;c__Clostridia;o__Clostridia_UCG-014;f__Clostridia_UCG-014	0.0284593822063	0.0488671394407	0.0429485021878	0.0218684652313	0.0153287385249	0.0414507772021	0.0224776324845	0.0185956225736	0.0288020826121	0.0100119676581	0.0862113245293	0.0513959947376	0.00391248248401	0.0210787521815	0.0640976778374	0.0424933164486	0.0587204087734	0.0610253657227
k__Bacteria;p__Firmicutes;c__Clostridia;o__Clostridia_vadinBB60_group;f__Clostridia_vadinBB60_group	0	0	0	0	0	0	0	0	0	0	6.75849204525e-05	0	0	0	0	0	0	0
k__Bacteria;p__Firmicutes;c__Clostridia;o__Clostridiales;f__Clostridiaceae	0.000386638865491	0.000442361658303	0.000228879165264	0.000427060937178	0.00041467669517	0.000578767500827	0.000481761871989	0.000548584932201	0.000540039048977	0.000831898187338	0.000378475554534	0.000643180821517	0.000818569030343	0.0010907504363	0.000816704325811	0.000422119037569	0.000652297991466	0.000738155952221
k__Bacteria;p__Firmicutes;c__Clostridia;o__Lachnospirales;f__Lachnospiraceae	0.0500283074884	0.0685661	0.101286	0.0245339145289	0.0164869734321	0.0605225443722	0.0498417068135	0.0716114330726	0.0915989309996	0.0204325870574	0.0135575350428	0.0220143	0.00262219570737	0.0186109293194	0.0417063675714	0.0251582946391	0.0543581659555	0.0705811300497
k__Bacteria;p__Firmicutes;c__Clostridia;o__Oscillospirales;f__Butyricicoccaceae	0	0	0	0	0	0	0.000151410874054	0	0	0	0	0	0	0	0	0	0	0
k__Bacteria;p__Firmicutes;c__Clostridia;o__Oscillospirales;f__Oscillospiraceae	0.00802275645894	0.000179709423686	0.0178660383709	0.00970459164139	0	8.26810715467e-05	6.88231245699e-05	0.00914308220334	0.000263095946938	0.000496219971394	0.000297373649991	0.0389709106856	0.000180362667703	0.0601276	0.0242833419541	7.03531729281e-05	0.00138613323186	0.0183465
k__Bacteria;p__Firmicutes;c__Clostridia;o__Oscillospirales;f__Ruminococcaceae	0.0456371946589	0	0.0281117468866	0.0120902423939	0	0.0126639841252	0.0127460426703	0.0150368536544	0.0543777780855	0	0	0.00982312527408	0	0.000477203315881	0	0	0.000163074497866	0
k__Bacteria;p__Firmicutes;c__Clostridia;o__Oscillospirales;f__UCG-010	0	0	0	0	0	0	0	0	0	0	2.7033968181e-05	0	0	0	0	0	0	0
k__Bacteria;p__Firmicutes;c__Clostridia;o__Oscillospirales;f__[Eubacterium]_coprostanoligenes_group	0.00327262182576	0.00839104770594	0	0	0	2.75603571822e-05	0	4.21988409385e-05	0.000221554481632	0.000102162935287	9.46188886336e-05	0	0	0.00043630017452	0.0182805651594	5.62825383425e-05	0.000108716331911	0
k__Bacteria;p__Firmicutes;c__Clostridia;o__Peptococcales;f__Peptococcaceae	0	0	0	0	0	0	0	0	0	0	0.0233303145402	0	0	0	0	0	0	0
k__Bacteria;p__Firmicutes;c__Clostridia;o__Peptostreptococcales-Tissierellales;f__Anaerovoracaceae	0	0	0	0	0	0	0	0	0	0	0	0	0	0	0	0	2.71790829777e-05	0
k__Bacteria;p__Firmicutes;c__Clostridia;o__Peptostreptococcales-Tissierellales;f__Peptostreptococcaceae	0.0137532967868	0.000152061820042	0	0	0	0	0	0	0	0	0	0	6.93702568087e-05	0	0.00732311545477	0	0	0
k__Bacteria;p__Firmicutes;c__Clostridia;o__Peptostreptococcales-Tissierellales;f__Peptostreptococcales-Tissierellales	0	0	0.0034870414002	0.000323977262687	0	0	0	0	0	0	0	0	0	0	0	0.00529055860419	0.000258201288289	0.0262112468125
k__Bacteria;p__Fusobacteriota;c__Fusobacteriia;o__Fusobacteriales;f__Fusobacteriaceae	0	0	0	0	0	0	0	0	0	0	0	0	0	0	0	0.000182918249613	0.0329274590275	0
k__Bacteria;p__Fusobacteriota;c__Fusobacteriia;o__Fusobacteriales;f__Leptotrichiaceae	0	0	0	0	0	0	0	0	0	0	0	0	0	0	0	0	0.000135895414889	0.00379814789961
k__Bacteria;p__Gemmatimonadota;c__AKAU4049;o__AKAU4049;f__AKAU4049	0	5.52952072879e-05	0	0	0	0	0	0	0	0	0	0	0	0	0	0	0	0
k__Bacteria;p__Gemmatimonadota;c__Gemmatimonadetes;o__Gemmatimonadales;f__Gemmatimonadaceae	5.52341236416e-05	0	0	0	0	0	0	0	8.30829306119e-05	0	0	0	0.000124866462256	0	0	0	4.07686244666e-05	0
k__Bacteria;p__Gemmatimonadota;c__Longimicrobia;o__Longimicrobiales;f__Longimicrobiaceae	0	0	0	0	0	0	0	0	0	0	0	0	0	0	4.08352162905e-05	0	0	0
k__Bacteria;p__Myxococcota;c__Polyangia;o__Blfdi19;f__Blfdi19	0	0	0	0	0.0011582349072	0	0	0	0	0	0	0	0	0	0	0	0	0
k__Bacteria;p__NB1-j;c__NB1-j;o__NB1-j;f__NB1-j	0	0	0	0	0.000142991963852	0	0	0	0	0	0	0	0	0	0	0	0	0
k__Bacteria;p__Proteobacteria;c__Alphaproteobacteria;Other;Other	2.76170618208e-05	0	0	0.0003387035019	0	0	4.12938747419e-05	0	0	0	0	0	0	0	0	0	0	0
k__Bacteria;p__Proteobacteria;c__Alphaproteobacteria;o__Azospirillales;f__Azospirillaceae	0	4.14714054659e-05	0	0	0	0	0	0	0	0	0	0	0	2.72687609075e-05	0	0	0	0
k__Bacteria;p__Proteobacteria;c__Alphaproteobacteria;o__Caulobacterales;f__Caulobacteraceae	0.0170121100816	0.0231825156555	0.0286772130596	0.00123700409389	0.0323018846341	0.000840590894058	0.000660701995871	0.0188206830586	0.0467618427794	0.0114276540471	0.0305213500764	0.0120011694197	0.0106830195485	0.00370855148342	0.00692837503063	0.0187421	0.0594814230968	0.0465843510938
k__Bacteria;p__Proteobacteria;c__Alphaproteobacteria;o__Caulobacterales;f__Hyphomonadaceae	0	0	0	0	0	0	0	0	0	0	0	0	0.0241824715235	0	0	0	0	0
k__Bacteria;p__Proteobacteria;c__Alphaproteobacteria;o__Micavibrionales;f__Micavibrionaceae	0.000124276778194	0	0	0	0	0	0	0	0	0	0	0	0	0	0	0	0	0.000724734934908
k__Bacteria;p__Proteobacteria;c__Alphaproteobacteria;o__Micavibrionales;f__uncultured	0	0	0	0	0	0	0	0	0.00318484567346	0	0	0	0	0	0	0	0	0
k__Bacteria;p__Proteobacteria;c__Alphaproteobacteria;o__Puniceispirillales;f__EF100-94H03	0	2.7647603644e-05	0	0	0	0	0	0	0	0	0	0	0.000443969643576	0	0	0.000239200787956	0	0
k__Bacteria;p__Proteobacteria;c__Alphaproteobacteria;o__Puniceispirillales;f__uncultured	0	0	0	0	0	0	0	0	0	0	0	0	0	0.000122709424084	0	0	0	0
k__Bacteria;p__Proteobacteria;c__Alphaproteobacteria;o__Rhizobiales;Other	0	0	0	0	0	0.000509866607871	0	0	0	0	0	0	0	0	0	0	0	0
k__Bacteria;p__Proteobacteria;c__Alphaproteobacteria;o__Rhizobiales;f__Beijerinckiaceae	0.000220936494566	0	0.000134634803097	0.00241510323094	0	0	6.88231245699e-05	0.000112530242503	0	0.000540004086517	0	0	0.000305229129958	0	0.000258623036507	0.00180104122696	0	0
k__Bacteria;p__Proteobacteria;c__Alphaproteobacteria;o__Rhizobiales;f__Rhizobiaceae	9.66597163728e-05	0	0	0.000206167348982	0.000357479909629	0	8.25877494838e-05	0	0	0	0	0	0	0	0	0	0	0
k__Bacteria;p__Proteobacteria;c__Alphaproteobacteria;o__Rhizobiales;f__Rhizobiales_Incertae_Sedis	0.00950026926635	0	0	0	0	0	0	0	0	0	0.00150038523405	0	0	0	0	0	0	0
k__Bacteria;p__Proteobacteria;c__Alphaproteobacteria;o__Rhizobiales;f__Xanthobacteraceae	0	0	0.000336587007742	0	0	0	0	0	0	0	0	0	0	0	0	0	0	0
k__Bacteria;p__Proteobacteria;c__Alphaproteobacteria;o__Rhodobacterales;f__Rhodobacteraceae	0.157403	0.113811	0.157913	0.562616	0.0688935281837	0.00265957446809	0.294646	0.339138	0.0198568204162	0.358709	0.104256	0.141105	0.0156776780388	0.259653	0.0284485340157	0.0190234979598	0.439445	0.0623943094887
k__Bacteria;p__Proteobacteria;c__Alphaproteobacteria;o__Rhodospirillales;f__Magnetospirillaceae	0	0	0	0	0	0	0	0	4.1541465306e-05	0	0	0	0	0	0	0	0	0
k__Bacteria;p__Proteobacteria;c__Alphaproteobacteria;o__Rhodospirillales;f__uncultured	0	0	0	0	0.000200188749392	0	0	0	0	0	0	0	0.0164130027609	0	0	0	0	0
k__Bacteria;p__Proteobacteria;c__Alphaproteobacteria;o__Rickettsiales;f__AB1	0	0	0	0	0	0	0	0	0	0	0.000148686824996	0	0	0	0	2.81412691712e-05	0	6.71050865656e-05
k__Bacteria;p__Proteobacteria;c__Alphaproteobacteria;o__Rickettsiales;f__Fokiniaceae	0	0	0	0	0	0	0	0	0	0	0	0	0	0.000204515706806	0	0	0	0
k__Bacteria;p__Proteobacteria;c__Alphaproteobacteria;o__Rickettsiales;f__Rickettsiaceae	0	0	0.000121171322787	0	0.000114393571081	0	0	0	0	0	0	0	0	0	0	0	0	0
k__Bacteria;p__Proteobacteria;c__Alphaproteobacteria;o__Sphingomonadales;f__Sphingomonadaceae	0	0.000193533225508	0.00039044092898	0.000412334697965	0	0	0	0.00029539188657	0.000664663444895	0.000890277007502	0.000189237777267	0.0204209910832	0.000652080414002	0.00043630017452	0	0.000295483326298	0.00142690185633	8.05261038787e-05
k__Bacteria;p__Proteobacteria;c__Gammaproteobacteria;Other;Other	0.00847843797898	0.00240534151702	0.00589700437563	0.0146526	0.00983784711299	0	0.000495526496903	0.000436054689698	0	0.0184185177618	0.0156121166245	0.000438532378307	0	0.0131435427574	0	0.00106936822851	0	0.00512682861361
k__Bacteria;p__Proteobacteria;c__Gammaproteobacteria;o__Alteromonadales;Other	0	0	0	0	0	0	0	0	0	0	0	0	0	0	0	0	0.00684912891039	0.0119044423567
k__Bacteria;p__Proteobacteria;c__Gammaproteobacteria;o__Alteromonadales;f__Alteromonadaceae	0	0	0.0124941097274	0	0	0	0	0	0	0	0	0	0	0	0	0	0	0
k__Bacteria;p__Proteobacteria;c__Gammaproteobacteria;o__Alteromonadales;f__Colwelliaceae	0	0.00392595971744	0	0.000279798545048	0.00310292561558	0.000110241428729	0.0383482450103	0.00177235131942	0.00984532727751	0.000175136460492	0.0190724645517	0.000292354918872	0	0.0253463132635	0.014619	0.000168847615027	0.000190253580844	0
k__Bacteria;p__Proteobacteria;c__Gammaproteobacteria;o__Alteromonadales;f__Pseudoalteromonadaceae	0	0	0	0	0.000285983927703	0	0	0	0	0	0	0	0	0	0	0	0	0
k__Bacteria;p__Proteobacteria;c__Gammaproteobacteria;o__Alteromonadales;f__Psychromonadaceae	0	0	0	0.00126645657232	0.00680641747934	0	0.000151410874054	0	0	0.00058378820164	0.00790743569295	0.00518929980997	0.00443969643576	0.000149978184991	0	0	2.71790829777e-05	0
k__Bacteria;p__Proteobacteria;c__Gammaproteobacteria;o__Alteromonadales;f__Shewanellaceae	0	6.91190091099e-05	0	0	0.00271684731318	0.0455710506008	0	0	0	0	0	0	0.000818569030343	0	0	0.0160265	0	0
k__Bacteria;p__Proteobacteria;c__Gammaproteobacteria;o__Burkholderiales;Other	0	5.52952072879e-05	0	0	0	0	0	0	0	4.3784115123e-05	1.35169840905e-05	0	5.5496205447e-05	1.36343804538e-05	0	0	0	1.34210173131e-05
k__Bacteria;p__Proteobacteria;c__Gammaproteobacteria;o__Burkholderiales;f__Alcaligenaceae	0	5.52952072879e-05	0	0	0	0	0	0	5.53886204079e-05	0	0	0	0	0	0	0	0	0
k__Bacteria;p__Proteobacteria;c__Gammaproteobacteria;o__Burkholderiales;f__Burkholderiaceae	0.0187381764454	0.00561246353972	0.00748569505217	0.0013548140076	0.00597706	0.00132289714475	0.000316586373021	0	0.0049157400612	0.000262704690738	0	0.000833211518784	0.000485591797661	0.00076352530541	0.00310347643808	0.0109329	0.00264996059033	0.0146155
k__Bacteria;p__Proteobacteria;c__Gammaproteobacteria;o__Burkholderiales;f__Comamonadaceae	0.000234745025477	0.000304123640083	0.0109727364524	0.000250346066622	0.00248806017102	0.00450611839929	0.0135581555403	0.000661115174703	0.00955453702037	0.00211623223095	0.00670442410889	0.000950153486332	0	9.54406631763e-05	0.00788119674407	0.000619107921767	0.00638708449977	0.00103341833311
k__Bacteria;p__Proteobacteria;c__Gammaproteobacteria;o__Burkholderiales;f__Neisseriaceae	0.000510915643685	0	0	0	0	0	0	0	0	0	0	0	0	0	0	0	0	0.0202388941082
k__Bacteria;p__Proteobacteria;c__Gammaproteobacteria;o__Burkholderiales;f__Oxalobacteraceae	0.00168464077107	0.000649718685633	0.000430831369909	0.000456513415604	0	2.75603571822e-05	0	0.000281325606257	0.000761593530609	0.00086108759742	0.000567713331801	0.000628563075574	0.00055496205447	0.000627181500873	0.000680586938175	0.00022513015337	0.0002446117468	0
k__Bacteria;p__Proteobacteria;c__Gammaproteobacteria;o__Burkholderiales;f__Rhodocyclaceae	0.00979024841547	0	0.00363513968361	0	0	0	0.00933241569167	0.000661115174703	0.00130163257959	0	0.00679904299753	0	0	0	0.000190564342689	0.000379907133812	0.00468839181366	0.000644208831029
k__Bacteria;p__Proteobacteria;c__Gammaproteobacteria;o__Burkholderiales;f__Sutterellaceae	0	0	0	0.00555179218331	0	0	0	0	0	0	0	0	0	0	2.7223477527e-05	0	4.07686244666e-05	6.71050865656e-05
k__Bacteria;p__Proteobacteria;c__Gammaproteobacteria;o__Burkholderiales;f__TRA3-20	0	9.67666127538e-05	0	0	0	0	0	0	0	0	0	0	0	0	5.4446955054e-05	0	5.43581659555e-05	0
k__Bacteria;p__Proteobacteria;c__Gammaproteobacteria;o__Cellvibrionales;Other	0.000676618014609	0.000967666127538	0	0.000412334697965	0	0	0	0	0	0.00650923844829	0.00293318554764	0	0	0.000640815881326	0	0	0	0
k__Bacteria;p__Proteobacteria;c__Gammaproteobacteria;o__Cellvibrionales;f__BD2-7	0	0	0	0	0	0	0	0	0	0.000175136460492	0.000162203809086	0.000950153486332	0	0	0	0	0	0
k__Bacteria;p__Proteobacteria;c__Gammaproteobacteria;o__Cellvibrionales;f__Cellvibrionaceae	0.000372830334581	0.000898547118429	0	0	0.000100094374696	0	6.88231245699e-05	0	0	0.00102162935287	0.00264932888174	0.0131267358573	0	0.000940772251309	0	0	0	0
k__Bacteria;p__Proteobacteria;c__Gammaproteobacteria;o__Cellvibrionales;f__Halieaceae	0.0116267830266	0.00250210812978	0	0.0247695343563	0.000958046157806	0	0.0265657	0.000351657007821	0.000609274824487	0.0596923436177	0.00336572903854	0.0157433123812	0.00283030647779	0.00693989965096	0.00728228023848	0	0	0
k__Bacteria;p__Proteobacteria;c__Gammaproteobacteria;o__Cellvibrionales;f__Porticoccaceae	0	0	0	0.000574323329308	0	0	0	0	0	0	0	0	0	0	0	0	0	0
k__Bacteria;p__Proteobacteria;c__Gammaproteobacteria;o__EV818SWSAP88;f__EV818SWSAP88	0	6.91190091099e-05	0	0.0152269313463	0.0731975862957	0.0427461139896	0	0.0020818094863	0	0	0	0	0	0	0	0	0	0
k__Bacteria;p__Proteobacteria;c__Gammaproteobacteria;o__Enterobacterales;f__Enterobacteriaceae	0	0.140865	0.000242342645574	0.0160810532206	0.00966625675637	0	0.0166827253957	0	0.0327623689713	0.0176449983946	0.000135169840905	0.0185353018565	0.00031910318132	0.0284140488656	0.0476138621948	0	0.000353328078711	0.0296336062274
k__Bacteria;p__Proteobacteria;c__Gammaproteobacteria;o__Enterobacterales;f__Erwiniaceae	0	0	0	0	0	0	0.000151410874054	0	0	0	0	0	0	0	0	0	0	0
k__Bacteria;p__Proteobacteria;c__Gammaproteobacteria;o__Francisellales;f__Francisellaceae	0.000828511854624	0	0.00113093234601	0.000235619827408	0	0	0.0044322092223	0.00921341360491	0.000290790257142	0	0.00108135872724	0.00657798567461	0.0132497190505	0.0083715095986	0.0219148994093	0.00690868158154	0	0.000161052207757
k__Bacteria;p__Proteobacteria;c__Gammaproteobacteria;o__Gammaproteobacteria_Incertae_Sedis;f__Unknown_Family	0.00740137256797	0.000345595045549	9.42443621676e-05	0.000176714870556	0	0	0	0	0	0	0	0	0	0	0	0	0	0
k__Bacteria;p__Proteobacteria;c__Gammaproteobacteria;o__Granulosicoccales;f__Granulosicoccaceae	0	0	4.0390440929e-05	0	0	0	0	0	0	0	0	0	0	0	0	0	0	0
k__Bacteria;p__Proteobacteria;c__Gammaproteobacteria;o__Legionellales;f__Legionellaceae	0.000469490050953	0.00519774948506	0.00289464826658	0.00724530969281	0.0189321	0.000179142321684	0.00341362697866	0.000562651212513	0	0.00413030152661	0.00052716237953	0.000219266189154	0	0.0117528359511	0	0	0	0
k__Bacteria;p__Proteobacteria;c__Gammaproteobacteria;o__Nitrosococcales;f__Nitrosococcaceae	0	0.000110590414576	0	0	0	0	0	0	0	0	0	0	0	0	0	0	0	0
k__Bacteria;p__Proteobacteria;c__Gammaproteobacteria;o__Oceanospirillales;f__Alcanivoracaceae1	0	0.000152061820042	0	0	0	0	0	0	0	0	0	0	0	0	0	0	0	0
k__Bacteria;p__Proteobacteria;c__Gammaproteobacteria;o__Oceanospirillales;f__Endozoicomonadaceae	0	0.000884723316607	0	0.000809943156717	0	0	0.00638678596008	0.00935407640803	0	0.00631950728276	0.00447412173396	0.00333284607514	0.00770009850576	0.0058082460733	0.000367516946615	0	0	0
k__Bacteria;p__Proteobacteria;c__Gammaproteobacteria;o__Oceanospirillales;f__Halomonadaceae	0.0372554163962	0.00427155476299	0.0355435880175	0.00446205048155	0.0147138730803	0.00921893947746	0.0155677907777	0.0210572216283	0.0451832670978	0.0119238740185	0.00217623443857	0.0364858938752	0.0128889937151	0.0101303446771	0.0198459151172	0.0144224004503	0.00380507161688	0.0132062810361
k__Bacteria;p__Proteobacteria;c__Gammaproteobacteria;o__Oceanospirillales;f__Kangiellaceae	0	0	0	0	0	0	0	0	0.000110777240816	0	0	0	0	0	0	0	0	0
k__Bacteria;p__Proteobacteria;c__Gammaproteobacteria;o__Oceanospirillales;f__Oleiphilaceae	0	0	0	0	0	0	0	0	0	0.0014594705041	0	0.000950153486332	0	0	0	0	0	0
k__Bacteria;p__Proteobacteria;c__Gammaproteobacteria;o__Oceanospirillales;f__Saccharospirillaceae	0.000400447396401	0.000152061820042	0	0	0	0	0.000192704748796	0	0	0.00058378820164	0	0	0.000346851284043	0	0	0	0	0
k__Bacteria;p__Proteobacteria;c__Gammaproteobacteria;o__Pasteurellales;f__Pasteurellaceae	0	0.0198786	0.00628744530461	0.000103083674491	0.000142991963852	0.0285663102194	0.00996558843772	0.0408484780285	0.0145395128571	0	0.0403887484624	0	0.0377512937553	5.4537521815e-05	0	5.62825383425e-05	0.00262278150735	0.0151120654946
k__Bacteria;p__Proteobacteria;c__Gammaproteobacteria;o__Piscirickettsiales;f__Piscirickettsiaceae	0	0	0	0	0	0	0	0	0	0	0	0	0	0.00681719022688	0	0	0	0
k__Bacteria;p__Proteobacteria;c__Gammaproteobacteria;o__Pseudomonadales;f__Moraxellaceae	0.000400447396401	0	0.00958599798048	0	0.00311722481197	0	0.00459738472127	0	0.000387720342856	0	0.000229788729539	0	0.0077972168653	6.81719022688e-05	0.000884763019628	0.000408048402983	0.00655015899764	0
k__Bacteria;p__Proteobacteria;c__Gammaproteobacteria;o__Pseudomonadales;f__Pseudomonadaceae	9.66597163728e-05	2.7647603644e-05	0.00434870414002	0	0	0	0	0	0	0	0.0223300577175	0	0.000138740513617	0	0	0	0	0
k__Bacteria;p__Proteobacteria;c__Gammaproteobacteria;o__Steroidobacterales;f__Steroidobacteraceae	0	0	0	0	0	0	0	0	0	0	0	2.92354918872e-05	0	0	0	0	0	0
k__Bacteria;p__Proteobacteria;c__Gammaproteobacteria;o__Vibrionales;f__Vibrionaceae	0.0249520153551	0.00804545266039	0.00372938404578	0.00413807321886	0.270998	0.293518	0.0113695801789	0.00074551285658	0.0167827519836	0.16098	0.0298725	0.00268966525362	0.169472	0.0072534904014	0.0815887621485	0.338905	0	0.0163333780701
k__Bacteria;p__Proteobacteria;c__Gammaproteobacteria;o__Xanthomonadales;f__Rhodanobacteraceae	0	0	0	0	0	0	0	0	2.7694310204e-05	0	0	0	0	0	0	0	0	0
k__Bacteria;p__Proteobacteria;c__Gammaproteobacteria;o__Xanthomonadales;f__Xanthomonadaceae	4.14255927312e-05	0.000400890252837	0	0	0	0	0	0	0	0.000102162935287	0	0	0	0	0.000190564342689	0	0	5.36840692524e-05
k__Bacteria;p__Proteobacteria;c__Gammaproteobacteria;o__uncultured;f__uncultured	0	0	0	0.000132536152917	0.00504761632396	0	0	0	0	0	0	0	0	0	0	0	0	0
k__Bacteria;p__Verrucomicrobiota;c__Verrucomicrobiae;o__Pedosphaerales;f__Pedosphaeraceae	0	0	0	0	0	0	2.75292498279e-05	0	0	0	0	0	0	0	0	0	0	0
k__Bacteria;p__Verrucomicrobiota;c__Verrucomicrobiae;o__Verrucomicrobiales;f__Akkermansiaceae	0	0	0	0	0	0	0	0	0	0	0	0	0	0	0	4.22119037569e-05	0	0
k__Bacteria;p__Verrucomicrobiota;c__Verrucomicrobiae;o__Verrucomicrobiales;f__Rubritaleaceae	0.000538532705505	0.000926194722072	0.00123864018849	0.00434424056784	0.000614865444562	0	0.00275292498279	0.000225060485005	0	0.00183893283517	0.000594747299982	0.00061394532963	0	0.000954406631763	0	0	0	0

## Sheet: genus
Taxonomy	HS0-2	HS0-1	HS0-3	HS1-1	HS1-2	HS1-3	HS2-1	HS2-2	HS2-3	HS3-1	HS3-2	HS3-3	HS4-1	HS4-2	HS4-3	HS5-1	HS5-2	HS5-3
Muribaculaceae	0.293086	0.196022	0.233322	0.0559892	0.198745	0.182518	0.165547	0.196211	0.318208	0.104425	0.108393	0.193554	0.231627	0.20712	0.207906	0.171366	0.060854	0.143538
Other	0.137367	0.175687	0.195974	0.229729	0.0901707	0.018741	0.198307	0.129522	0.0885664	0.271126	0.246104	0.156922	0.0438975	0.215287	0.0662211	0.0367103	0.0279401	0.0603677
Prevotellaceae_UCG-001	0.0792472	0.0575347	0.117173	0.0278031	0.100395	0.121252	0.085905	0.0666038	0.151432	0.0192796	0.0916992	0.108259	0.166211	0.0792976	0.116898	0.148614	0.0662762	0.0808214
Vibrio	0.024952	0.00804545	0.00372938	0.00413807	0.270998	0.293518	0.0113696	0.000745513	0.0167828	0.16098	0.0298725	0.00268966	0.169472	0.00725349	0.0815888	0.338905	0	0.0163334
uncultured	0.0560488	0.0312141	0.0505958	0.0542367	0.0439414	0.000564987	0.0475293	0.0601755	0.0512345	0.0397414	0.0662467	0.0691712	0.0265827	0.0905459	0.0075409	0.0187702	0.0612888	0.0627567
Alistipes	0.0507878	0.0308824	0.0369842	0.0114128	0.0132411	0.0436556	0.0303785	0.0290187	0.0977471	0.0240083	0.0134088	0.0356819	0.0359893	0.0164294	0.0467291	0.0663149	0.000258201	0.110428
Citreicella	0	0.000152062	0	0.234825	0	0	0.000757054	0.000154729	0	0	0	0.00058471	0	0	0	0.000126636	0.43443	0
Clostridia_UCG-014	0.0284594	0.0488671	0.0429485	0.0218685	0.0153287	0.0414508	0.0224776	0.0185956	0.0288021	0.010012	0.0862113	0.051396	0.00391248	0.0210788	0.0640977	0.0424933	0.0587204	0.0610254
Sedimentitalea	0.00738756	0.00399508	0.000430831	0.0293641	0.0108102	0.000592548	0.0478183	0.166362	0.0115901	0.0767681	0.015531	0.0288408	0.0029413	0.0415576	0	0	0.00028538	0
Lachnospiraceae_NK4A136_group	0.00851986	0.0392181	0.0630899	0.0122375	0.00571968	0.0388601	0.000110117	0.0290891	0.0642093	0.0146239	0.00162204	0.0212542	0.00108218	0.0178474	0.0209076	0.00358801	0.0450357	0.0166018
Bacteroides	0.0157003	0.0576038	0.023588	0.039805	0.0105385	0.0335961	0.0173159	0.00891802	0.00048465	0.00666978	0.000148687	0.0392048	0.000332977	0.000286322	0.0263659	0.0129591	0.0380235	0.0638304
Lutibacter	0.000345213	0.0206251	0.000552003	0.0539275	0.0115252	0	0.00897454	0.00264446	0.00110777	0.0147552	0.0653817	0.00194416	0.0762379	0.0678447	0	0.00192768	0	0.00611998
Halomonas	0.0372554	0.00427155	0.0355436	0.00446205	0.0147139	0.00921894	0.0155678	0.0210572	0.0451833	0.0119239	0.00217623	0.0364859	0.012889	0.0101303	0.0198459	0.0144224	0.00380507	0.0132063
Alloprevotella	0	0.0124552	8.08E-05	0.000323977	0.000114394	0.0456262	0	0.000126597	0.000373873	0.00189731	0.0250605	0.043137	0.0399711	0.0135389	0.0459396	0.000168848	0.0202348	0.0586901
Nitriliruptoraceae	0.00555103	0.0040089	0.0113228	0.00182605	0.0137415	0.00738618	0.0366001	0.0341811	0.0177659	0.00828979	0.0341034	0.0038737	0.0261387	0.022824	0.0228541	0.0248206	0.00826244	0.0168434
Rodentibacter	0	0.0198786	0.00628745	0	0.000142992	0.0285663	0.00996559	0.0408485	0.0145395	0	0.0403887	0	0.0376126	5.45E-05	0	5.63E-05	0.00262278	0.014186
Streptococcus	0.0297022	0.0221043	0	0.00435897	0.0320016	0.0103076	0	0.0252912	0	0	0.0121518	0.0134191	0	0	0.0399096	0	0.000163074	0.00543551
Halocynthiibacter	0.00853367	0.00875047	0.0118883	0.0334875	0.012283	0.0015296	0.0360496	0.0101277	0	0.0177618	0.00478501	0.00983774	0.0013874	0.00338133	0.00593472	0.00021106	0.0013046	0.0210978
Nesterenkonia	0.0179649	0	0.0253787	0.00108974	0.000457574	0.00525025	0.00320716	0.00122377	0.0031433	0.00792492	0.0142604	0.00828826	0.00751974	0.0178747	0.0190564	0.0213029	0.0162395	0.00295262
Citrobacter	0	0.113162	0.000175025	0	0	0	0.000220234	0	0.0162289	0.00812925	0	0.0180968	0	0.0141116	0	0	0	0
Shimia	0.00505392	0.000940019	0.00026927	0.01103	0.00147282	0	0.0111769	0.0598942	0.000941607	0.014405	0.016315	0.00317205	0	0.0113438	0	0	0	0
EV818SWSAP88	0	6.91E-05	0	0.0152269	0.0731976	0.0427461	0	0.00208181	0	0	0	0	0	0	0	0	0	0
Escherichia-Shigella	0	0	6.73E-05	0.0160811	0.00955186	0	0.0164625	0	0.000235402	0	0.00013517	0.000233884	0.000124866	0.0141389	0.0355266	0	0	0.0294323
Psychroserpens	0	0.0132432	0.00165601	0.00991076	0.00383219	0	0.00242257	0.00526079	0	0.0168569	0.0310891	0.0159041	0	0.00639452	0	0	0	0
Colwellia	0	0.00392596	0	0.000279799	0.00104384	0.000110241	0.0383482	0.00177235	0.000249249	0.000175136	0.0188697	0	0	0.0253463	0.014619	0.000168848	0.000190254	0
Halioglobus	0.00527486	0.000566776	0	0.0110594	0.000872251	0	0.0157743	0.000154729	0.000609275	0.0411571	0.00282505	0.00505774	0.00283031	0.00627182	0.00664253	0	0	0
Staphylococcus	0	8.29E-05	0.00137327	0.0014579	0.00154431	0	0.00728149	0.00037979	0	0.000204326	0	0	0	0	0.0173686	0	0.0515451	0.0130721
Lactobacillus	0	8.29E-05	0	0.00914499	0	0	0	0.0159793	0.000207707	0.000102163	9.46E-05	0.0361643	2.77E-05	0.00914867	0	0.000112565	0.0089691	0
Ralstonia	0.0187382	0.00561246	0.00748569	0.00135481	0.00597706	0.0013229	0.000316586	0	0.00491574	0.000262705	0	0.000833212	0.000485592	0.000763525	0.00310348	0.0109329	0.00264996	0.0146155
Prevotella	0.00353498	0	0	0	0	0	0	0	0	0.00820222	0	0.0174097	0.0328399	0	0	0	0.0140924	0
Francisella	0.000828512	0	0.00113093	0.00023562	0	0	0.00443221	0.00921341	0.00029079	0	8.11E-05	0.00657799	0.0132497	0.00831697	0.0218196	0.00690868	0	0.000161052
Thalassobius	0.000745661	0.0013962	0.000215416	0.0185256	0.00193039	0.000165362	0.00823125	0.000309458	0	0.0170758	0	0.003786	0.00388473	0.00365401	0	0.00415084	0.00284021	0
Shewanella	0	6.91E-05	0	0	0.00271685	0.0455711	0	0	0	0	0	0	0.000818569	0	0	0.0159561	0	0
Ruminococcus	0	0	0.00484685	0	0	0	0	0.0150369	0.0265727	0	0	0	0	2.73E-05	0	0	4.08E-05	0
