# Supplementary material for: Effects of Undaria pinnatifida-derived brown algae polysaccharide (UPS) on the nutritional composition, digestive capacity, immune performance and intestinal microbiota of juvenile sea cucumber (Apostichopus japonicus)
Source: PeerJ. 2025 Aug 19;13:e19944. doi: 10.7717/peerj.19944 (PMC12372788; doi:10.7717/peerj.19944)
Supplement: Supplemental Information 14 [file peerj-13-19944-s014.xlsx]

## Sheet: Correlation analysis
Sample		Cellulase	Lipase	Pepsin	Amylase	T-SOD	T-AOC	H\-(2)O\-(2)	MDA	Saccharides content	Protein content	Lipid content	EV818SWSAP88	Ralstonia	Lachnospiraceae_UCG-001	Finegoldia	BD2-7
HS0-1	1	3.38303	43.2069	2.45252	1.5946	190.802	2.81533	37.7474	0.495868	2.35877	0.035416	2.72389	0	1357	0	0	0
HS0-2	2	1.72637	38.5108	1.14225	0.774881	226.125	2.97933	38.5353	1.65289	2.67183	0.042542	2.37017	5	406	0	0	0
HS0-3	3	2.40416	63.3472	1.79738	0.657423	242.875	2.02267	35.4348	1.05096	3.32422	0.040319	2.20435	0	556	4	0	0
HS1-1	4	2.09325	42.5896	1.35744	1.02097	294.975	2.84267	48.9	0.661157	2.86438	0.046154	2.71595	1034	92	0	22	0
HS1-2	5	5.67969	63.6929	0.734903	1.06577	265.368	3.198	53.1895	1.21019	4.0918	0.044113	2.65449	5119	418	6	0	0
HS1-3	6	5.5994	68.4974	1.35744	0.933914	257.692	2.02267	60.6821	1.11465	2.99814	0.041676	2.28151	3102	96	0	0	0
HS2-1	7	15.4709	65.5823	1.36791	0.705015	367.349	2.624	62.1974	0.661157	4.47175	0.047924	2.63221	0	23	0	0	0
HS2-2	8	15.9884	63.8396	1.60803	0.964214	314.714	3.25267	61.125	0.991736	4.93771	0.044719	2.5085	148	0	0	0	0
HS2-3	9	14.9534	67.325	0.775961	1.71707	331.411	2.56933	70.8696	0.66879	3.95647	0.045518	2.39571	0	355	0	0	0
HS3-1	10	3.90486	43.9784	0.94496	1.39546	328.969	3.772	50.6158	0.578512	2.53302	0.045558	2.50087	0	18	6	0	12
HS3-2	11	3.90486	59.4523	0.736896	1.03928	263.175	2.89733	55.3342	0.495868	5.46534	0.051664	2.35018	0	0	14	0	12
HS3-3	12	4.90486	66.634	0.840928	1.6267	356.383	3.08867	48.7228	0.43757961783439	3.0443	0.052426	2.50779	0	57	13	0	65
HS4-1	13	5.73206	77.8693	1.85017	1.41344	327.872	3.66267	55.3342	1.73554	2.74603	0.046341	1.88509	0	35	16	0	0
HS4-2	14	2.66013	81.6176	0.917703	1.10462	297.169	3.444	45.8974	1.75159	2.6897	0.040522	2.40038	0	56	11	0	0
HS4-3	15	4.1961	74.1209	1.38394	1.32969	280.72	3.772	55.8098	2.13376	3.31237	0.037713	1.92869	0	228	8	0	0
HS5-1	16	4.62341	70.5171	0.794069	1.25684	285.106	4.56467	42.4658	1.57025	2.73631	0.041073	2.57379	0	777	1299	376	0
HS5-2	17	4.01734	86.9097	1.17398	1.22003	245.63	3.25267	37.7474	1.81529	3.32536	0.038389	2.33174	0	195	8	19	0
HS5-3	18	6.9271	75.6264	0.984022	1.28274	251.113	3.25267	44.2935	1.33758	3.6521	0.04338	2.10127	0	1089	13	28	0

## Sheet: Sheet1
Cellulase	3.38303	1.72637	2.40416	2.09325	5.67969	5.5994	15.4709	15.9884	14.9534	3.90486	3.90486	4.90486	5.73206	2.66013	4.1961	4.62341	4.01734	6.9271
Lipase	43.2069	38.5108	63.3472	42.5896	63.6929	68.4974	65.5823	63.8396	67.325	43.9784	59.4523	66.634	77.8693	81.6176	74.1209	70.5171	86.9097	75.6264
Pepsin	2.45252	1.14225	1.79738	1.35744	0.734903	1.35744	1.36791	1.60803	0.775961	0.94496	0.736896	0.840928	1.85017	0.917703	1.38394	0.794069	1.17398	0.984022
Amylase	1.5946	0.774881	0.657423	1.02097	1.06577	0.933914	0.705015	0.964214	1.71707	1.39546	1.03928	1.6267	1.41344	1.10462	1.32969	1.25684	1.22003	1.28274
T-SOD	190.802	226.125	242.875	294.975	265.368	257.692	367.349	314.714	331.411	328.969	263.175	356.383	327.872	297.169	280.72	285.106	245.63	251.113
T-AOC	2.81533	2.97933	2.02267	2.84267	3.198	2.02267	2.624	3.25267	2.56933	3.772	2.89733	3.08867	3.66267	3.444	3.772	4.56467	3.25267	3.25267
H\-(2)O\-(2)	37.7474	38.5353	35.4348	48.9	53.1895	60.6821	62.1974	61.125	70.8696	50.6158	55.3342	48.7228	55.3342	45.8974	55.8098	42.4658	37.7474	44.2935
MDA	0.495868	1.65289	1.05096	0.661157	1.21019	1.11465	0.661157	0.991736	0.66879	0.578512	0.495868	0.43757961783439	1.73554	1.75159	2.13376	1.57025	1.81529	1.33758
Saccharides content	2.35877	2.67183	3.32422	2.86438	4.0918	2.99814	4.47175	4.93771	3.95647	2.53302	5.46534	3.0443	2.74603	2.6897	3.31237	2.73631	3.32536	3.6521
Protein content	0.035416	0.042542	0.040319	0.046154	0.044113	0.041676	0.047924	0.044719	0.045518	0.045558	0.051664	0.052426	0.046341	0.040522	0.037713	0.041073	0.038389	0.04338
Lipid content	2.72389	2.37017	2.20435	2.71595	2.65449	2.28151	2.63221	2.5085	2.39571	2.50087	2.35018	2.50779	1.88509	2.40038	1.92869	2.57379	2.33174	2.10127
EV818SWSAP88	0	5	0	1034	5119	3102	0	148	0	0	0	0	0	0	0	0	0	0
Ralstonia	1357	406	556	92	418	96	23	0	355	18	0	57	35	56	228	777	195	1089
Lachnospiraceae_UCG-001	0	0	4	0	6	0	0	0	0	6	14	13	16	11	8	1299	8	13
Finegoldia	0	0	0	22	0	0	0	0	0	0	0	0	0	0	0	376	19	28
BD2-7	0	0	0	0	0	0	0	0	0	12	12	65	0	0	0	0	0	0
